# Supplementary material for: Anionic glycolipids related to glucuronosyldiacylglycerol inhibit protein kinase Akt
Source: Royal Society of Chemistry journal article supplement (doi:10.1039/c4ob01602e), 2014-11-06

## Anionic glycolipids related to glucuronosyldiacylglycerol inhibit protein kinase Akt

*Maria Vetro,<sup>a</sup> Barbara Costa,<sup>b</sup> Giulia Donvito,<sup>b</sup> Noemi Arrighetti,<sup>c</sup> Laura Cipolla,<sup>b</sup> Paola Perego,<sup>\*c</sup> Federica Compostella,<sup>a</sup> Fiamma Ronchetti,<sup>a</sup> Diego Colombo<sup>\*a</sup>*

**SUPPLEMENTARY INFORMATIONS :** <sup>1</sup>H and <sup>13</sup>C NMR spectra of the prepared compounds.

|      |     |                                 |           |      |     |                                 |                                                                                                    |
|------|-----|---------------------------------|-----------|------|-----|---------------------------------|----------------------------------------------------------------------------------------------------|
| Page | S1  | <sup>1</sup> H NMR of compound  | <b>1a</b> | Page | S19 | <sup>1</sup> H NMR of compound  | <b>5b</b>                                                                                          |
| Page | S2  | <sup>13</sup> C NMR of compound | <b>1a</b> | Page | S20 | <sup>13</sup> C NMR of compound | <b>5b</b>                                                                                          |
| Page | S3  | <sup>1</sup> H NMR of compound  | <b>1b</b> | Page | S21 | <sup>1</sup> H NMR of compound  | <b>6a</b>                                                                                          |
| Page | S4  | <sup>13</sup> C NMR of compound | <b>1b</b> | Page | S22 | <sup>13</sup> C NMR of compound | <b>6a</b>                                                                                          |
| Page | S5  | <sup>1</sup> H NMR of compound  | <b>2a</b> | Page | S23 | <sup>1</sup> H NMR of compound  | <b>6b</b>                                                                                          |
| Page | S6  | <sup>13</sup> C NMR of compound | <b>2a</b> | Page | S24 | <sup>13</sup> C NMR of compound | <b>6b</b>                                                                                          |
| Page | S7  | <sup>1</sup> H NMR of compound  | <b>2b</b> | Page | S25 | <sup>1</sup> H NMR of compound  | <b>7a</b>                                                                                          |
| Page | S8  | <sup>13</sup> C NMR of compound | <b>2b</b> | Page | S26 | <sup>13</sup> C NMR of compound | <b>7a</b>                                                                                          |
| Page | S9  | <sup>1</sup> H NMR of compound  | <b>3a</b> | Page | S27 | <sup>1</sup> H NMR of compound  | <b>7b</b>                                                                                          |
| Page | S10 | <sup>13</sup> C NMR of compound | <b>3a</b> | Page | S28 | <sup>13</sup> C NMR of compound | <b>7b</b>                                                                                          |
| Page | S11 | <sup>1</sup> H NMR of compound  | <b>3b</b> | Page | S29 | <sup>1</sup> H NMR of compound  | <b>8b</b>                                                                                          |
| Page | S12 | <sup>13</sup> C NMR of compound | <b>3b</b> | Page | S30 | <sup>13</sup> C NMR of compound | <b>8b</b>                                                                                          |
| Page | S13 | <sup>1</sup> H NMR of compound  | <b>4a</b> | Page | S31 | <sup>1</sup> H NMR of compound  | <b>1,3-di-O-decanoyl-2-O-(2',3',4',6'-tetra-O-chloroacetyl-β-D-glucopyranosyl)-sn-glycerol</b>     |
| Page | S14 | <sup>13</sup> C NMR of compound | <b>4a</b> | Page | S32 | <sup>13</sup> C NMR of compound |                                                                                                    |
| Page | S15 | <sup>1</sup> H NMR of compound  | <b>4b</b> | Page | S33 | <sup>1</sup> H NMR of compound  | <b>1-O-octadecanoyl-3-O-acetyl-2-O-(2',3',4',6'-tetra-O-acetyl-β-D-glucopyranosyl)-sn-glycerol</b> |
| Page | S16 | <sup>13</sup> C NMR of compound | <b>4b</b> | Page | S34 | <sup>13</sup> C NMR of compound |                                                                                                    |
| Page | S17 | <sup>1</sup> H NMR of compound  | <b>5a</b> |      |     |                                 |                                                                                                    |
| Page | S18 | <sup>13</sup> C NMR of compound | <b>5a</b> |      |     |                                 |                                                                                                    |

Compound 1a (Pyd5)

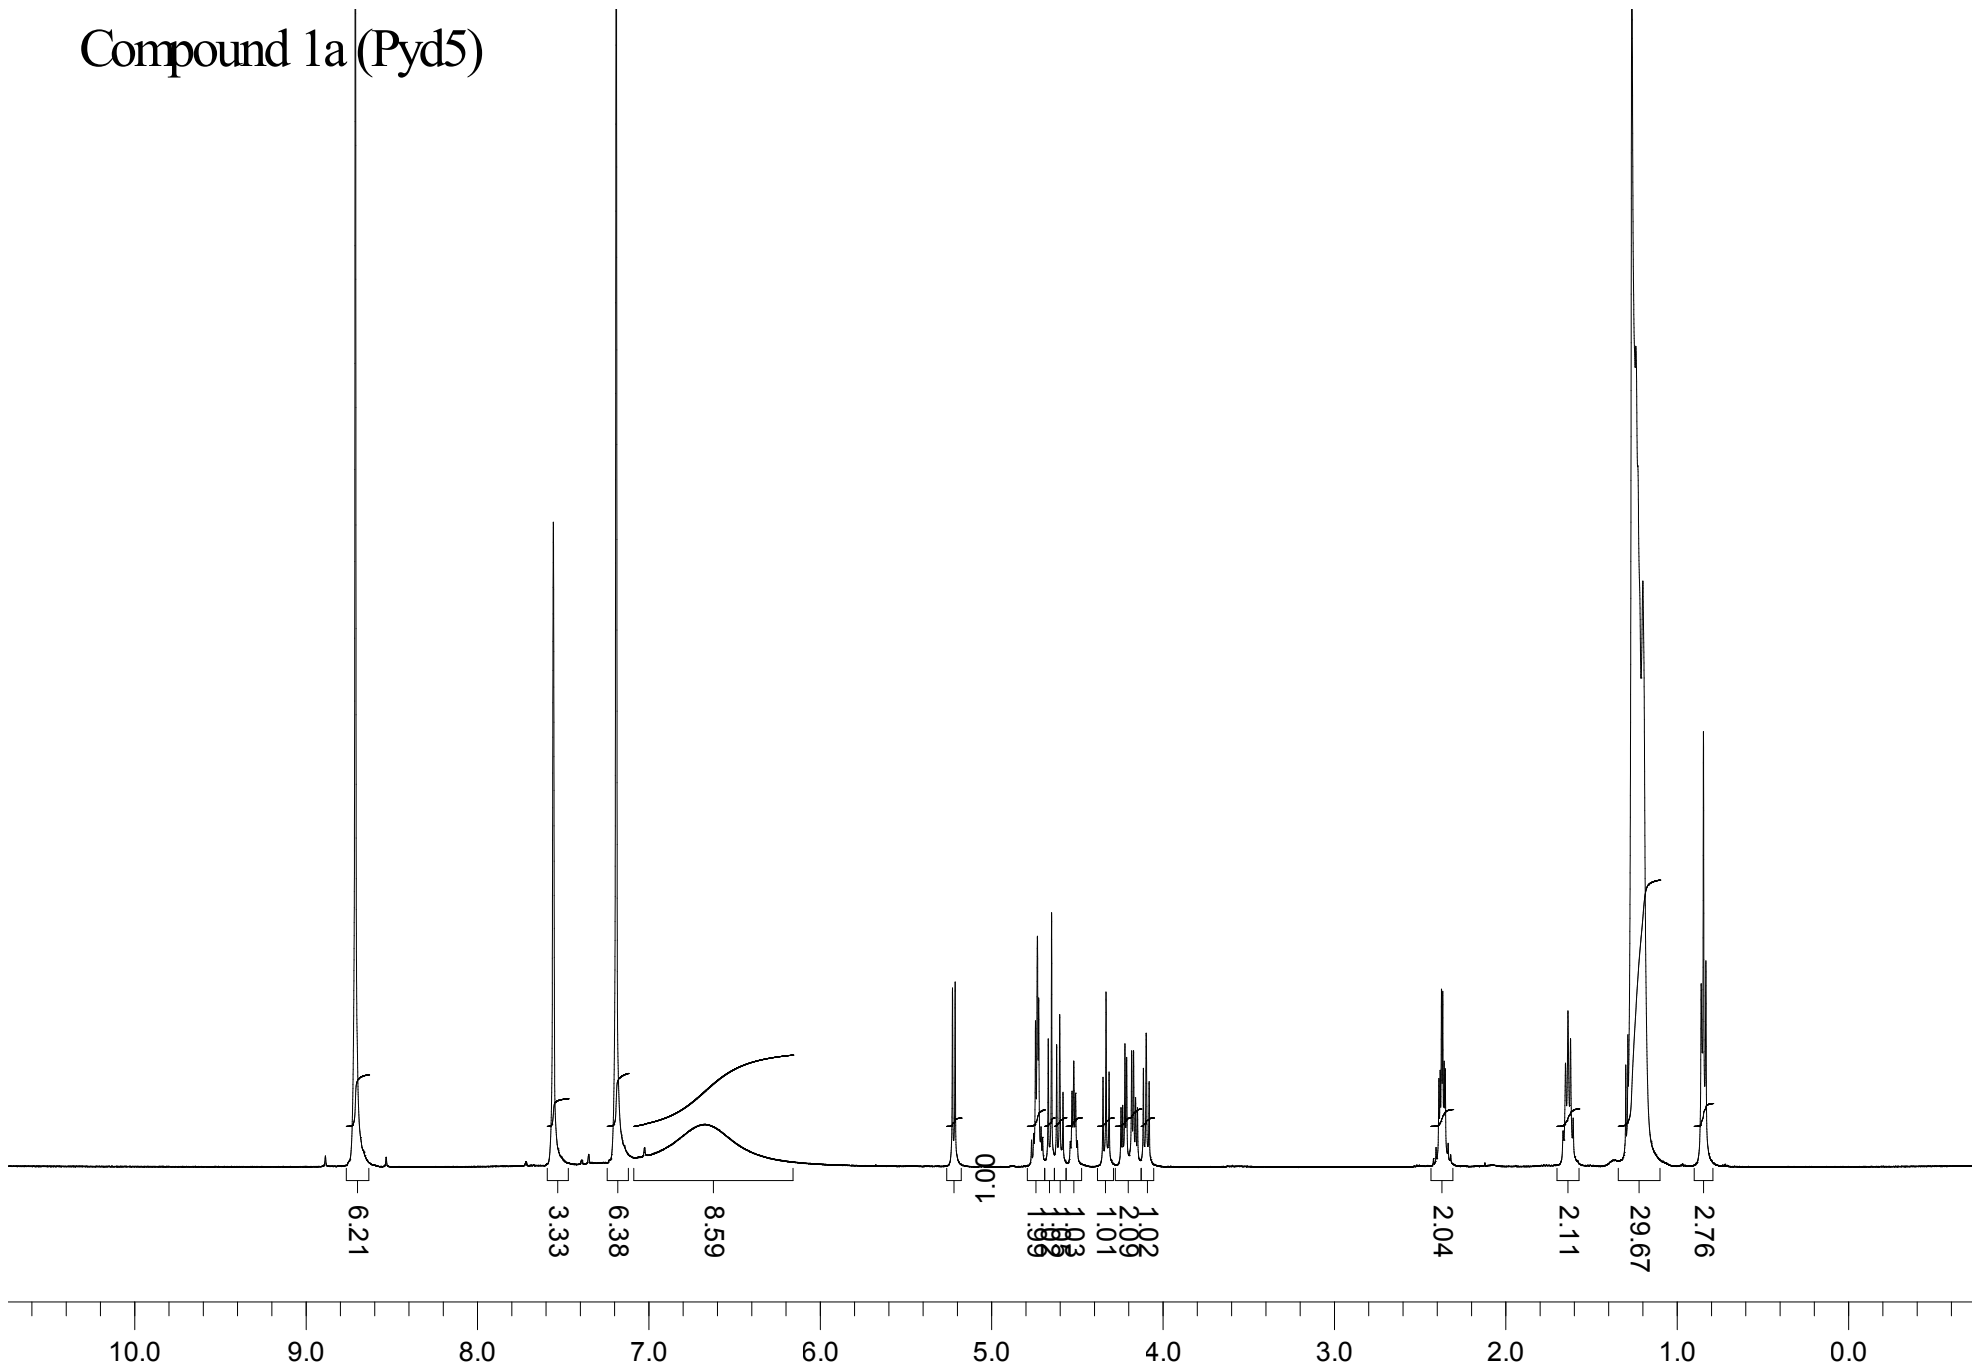

# Compound 1a (Pyd5)

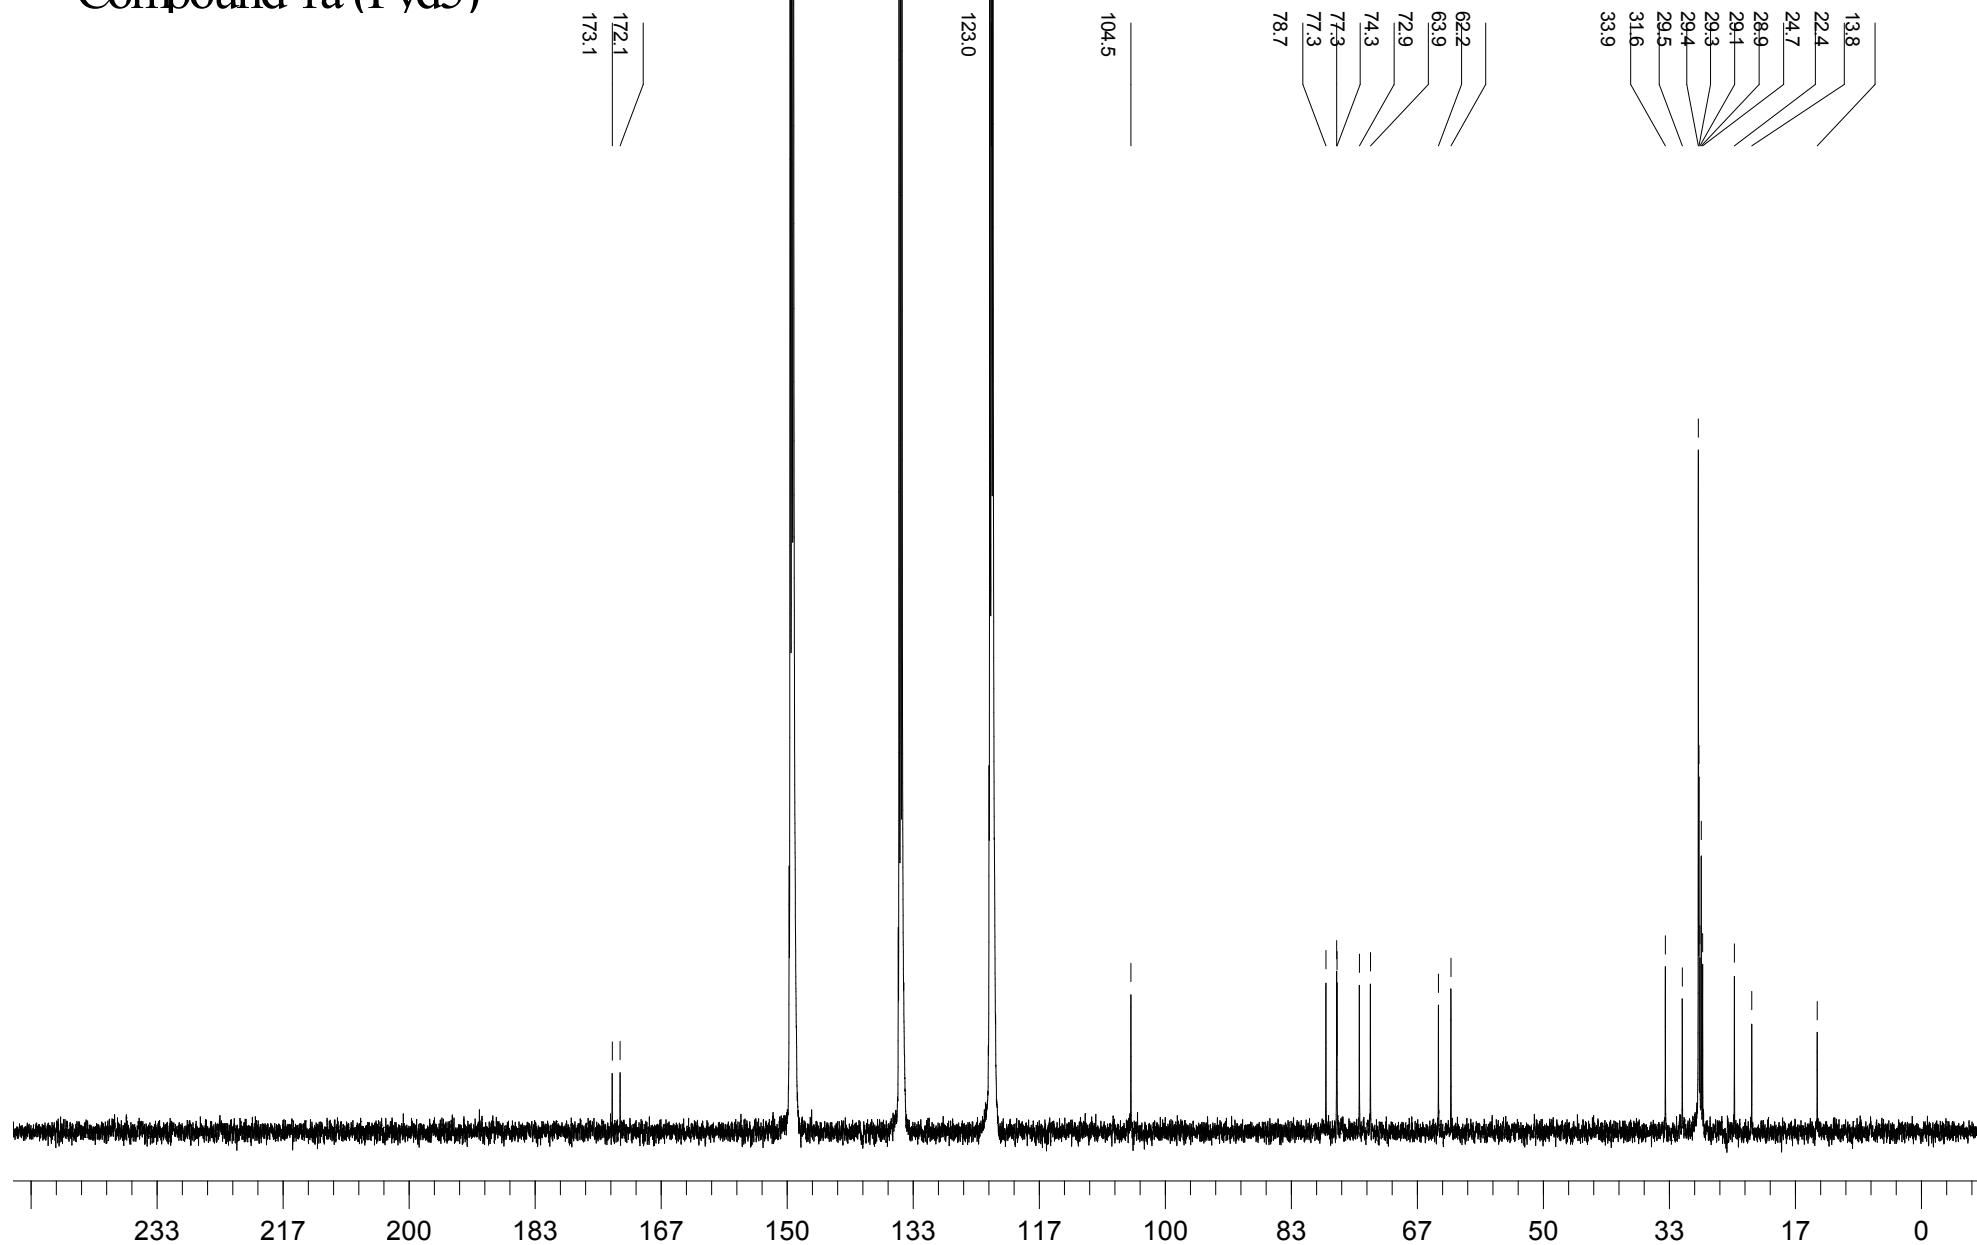

# Compound 1b (Pyd5)

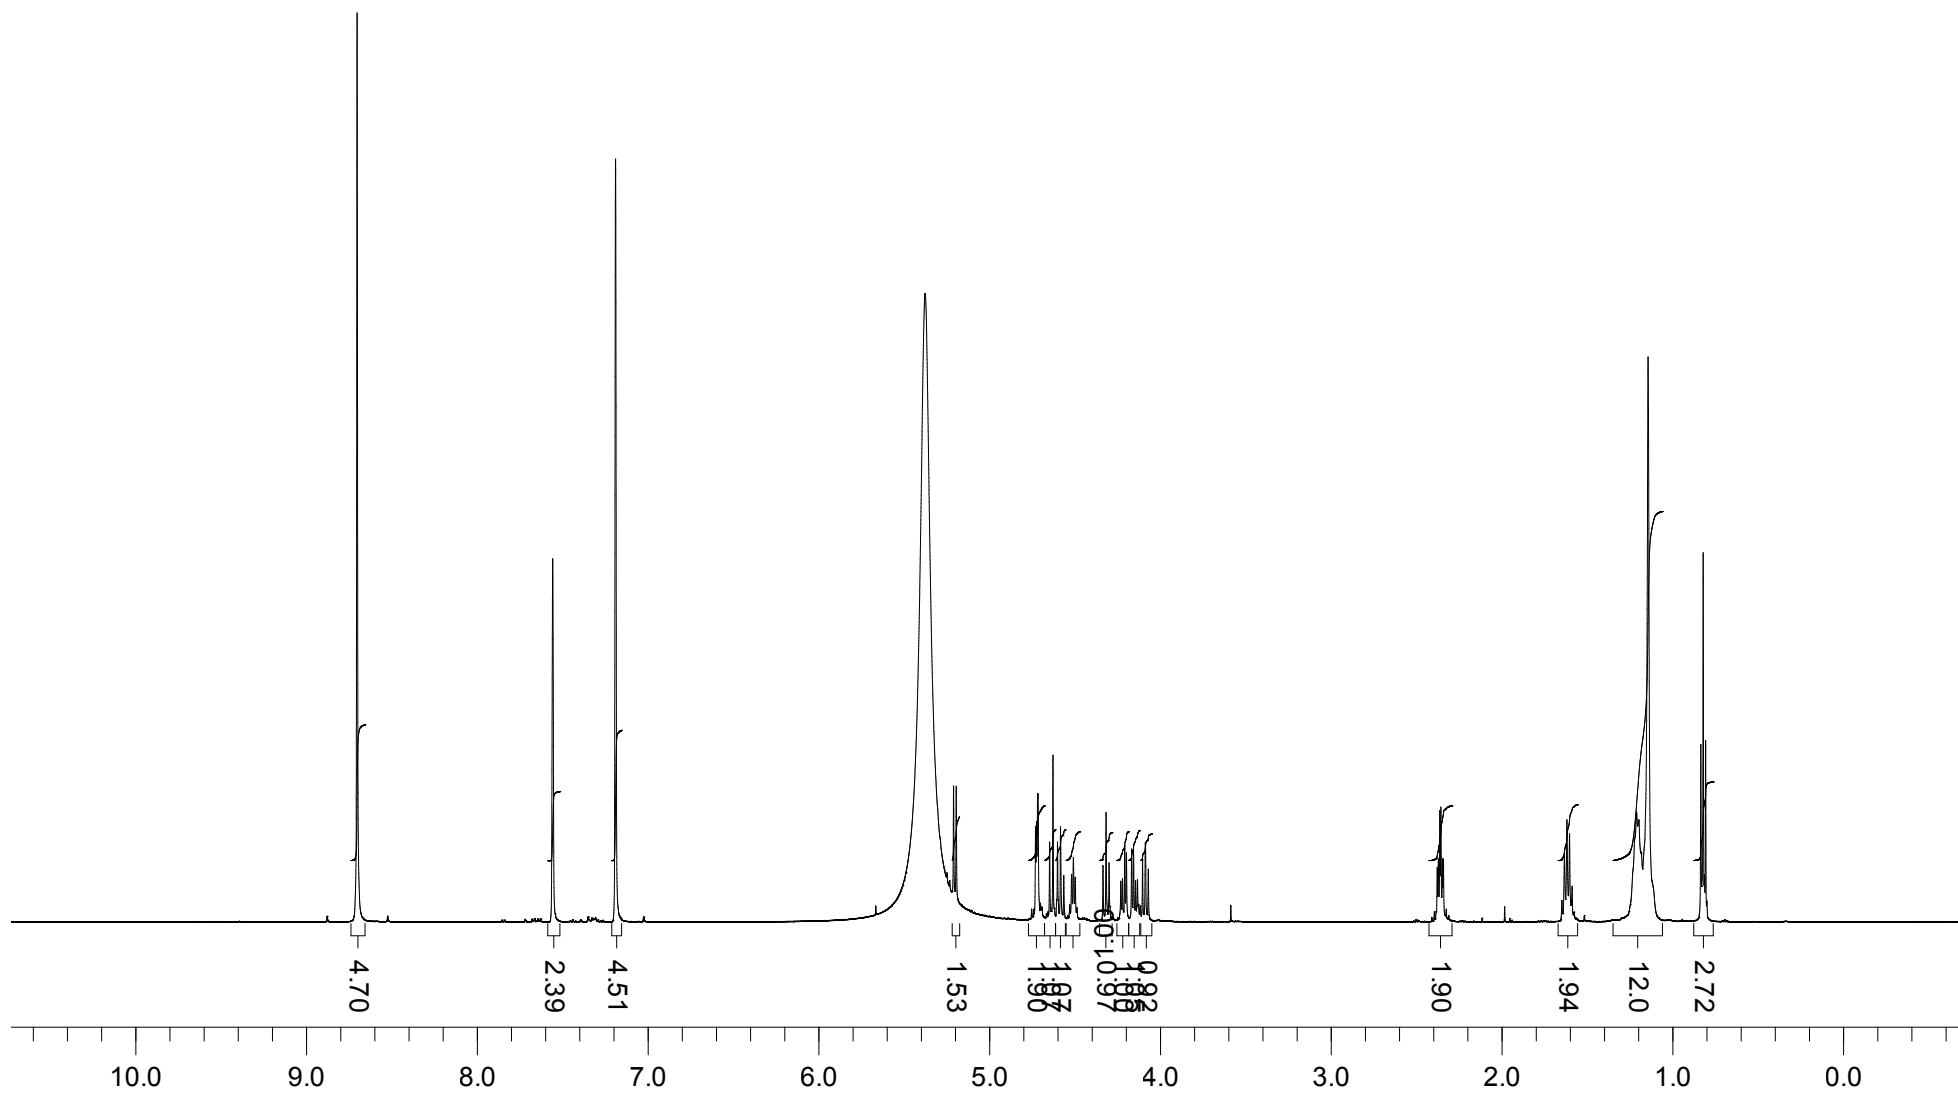

# Compound 1b (Pvd5)

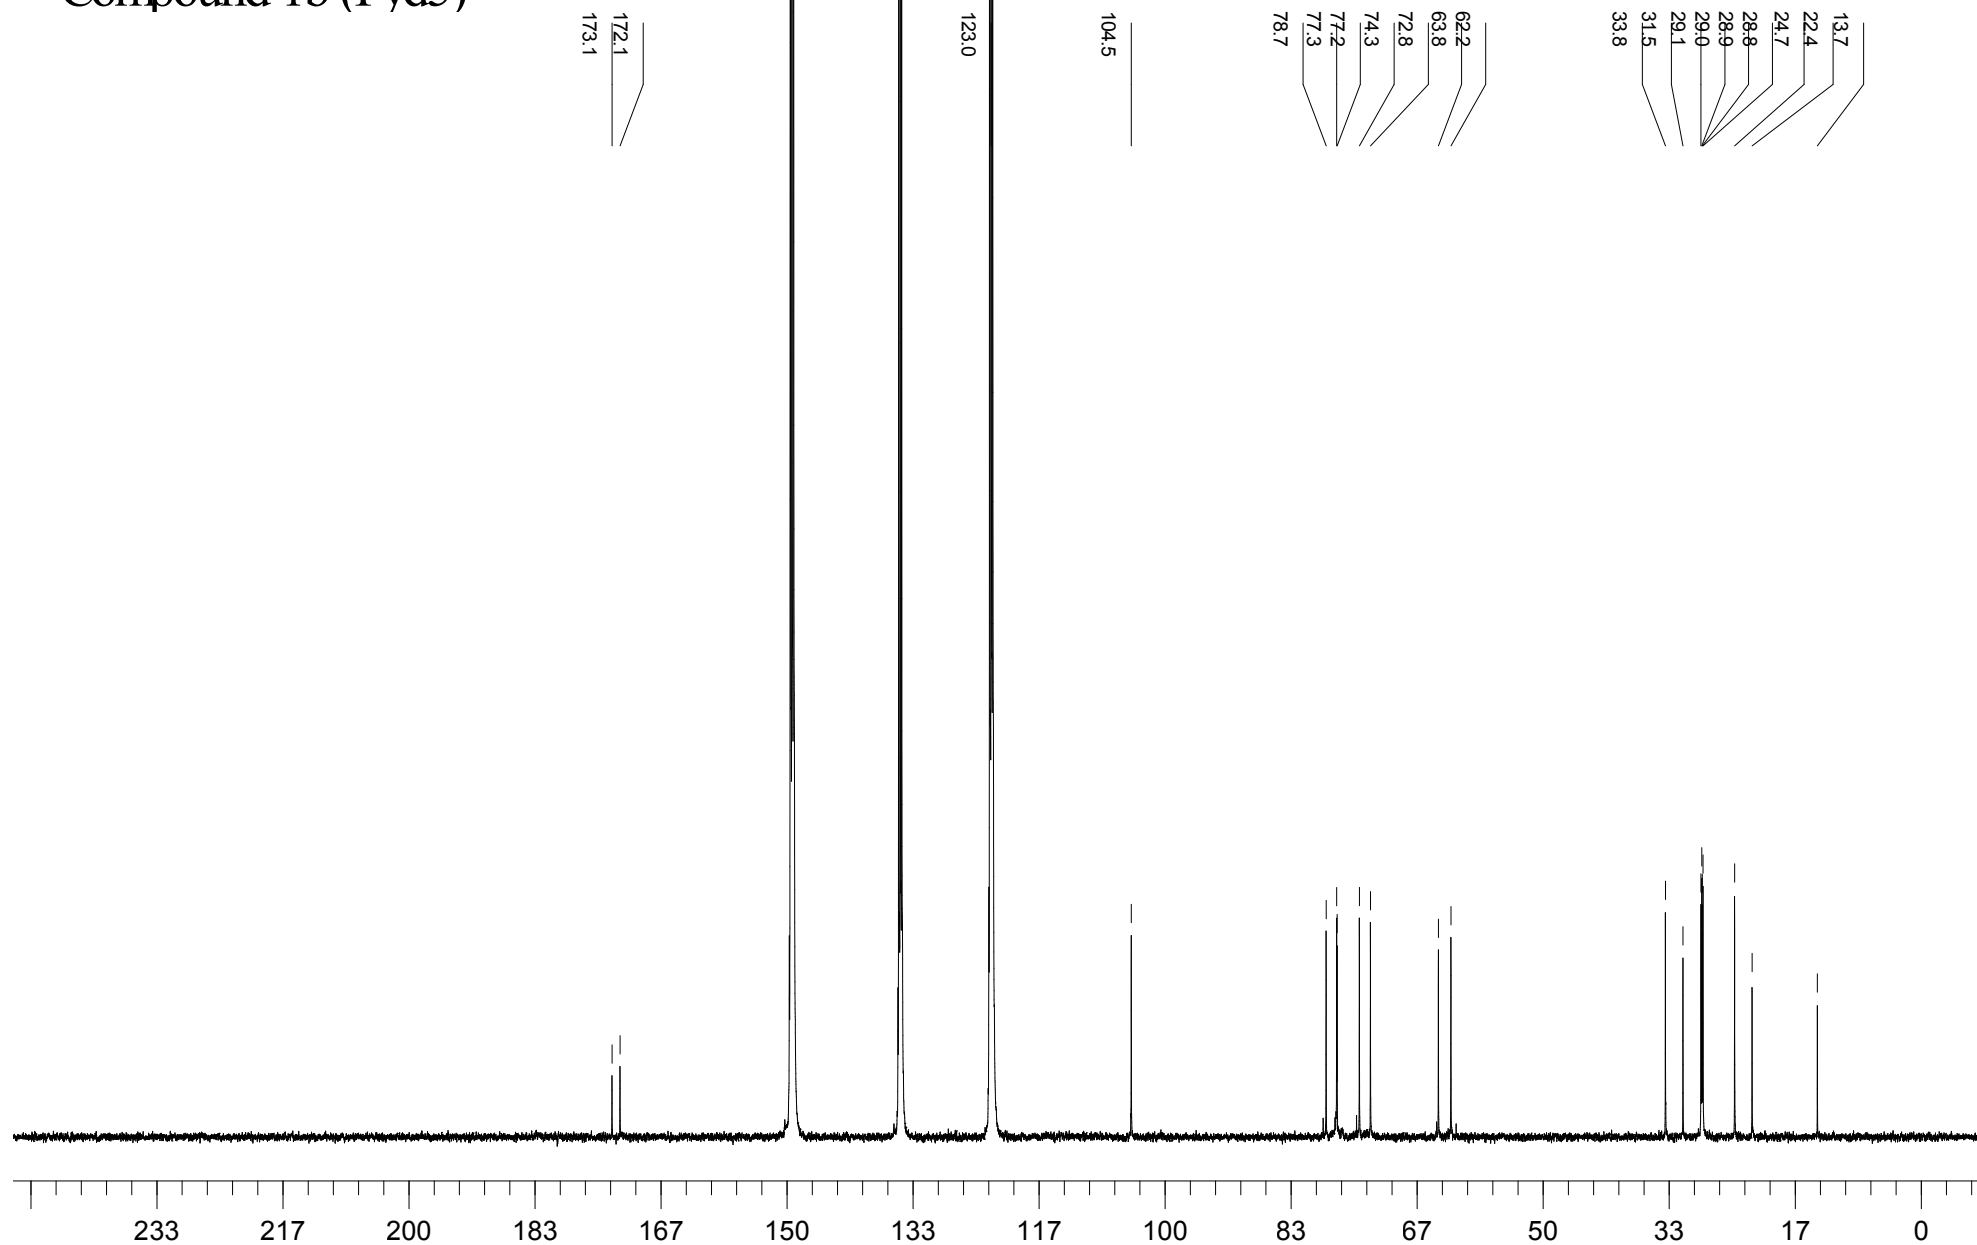

Compound 2a (CDCl<sub>3</sub>:CD<sub>3</sub>OD:D<sub>2</sub>O 65:35:6)

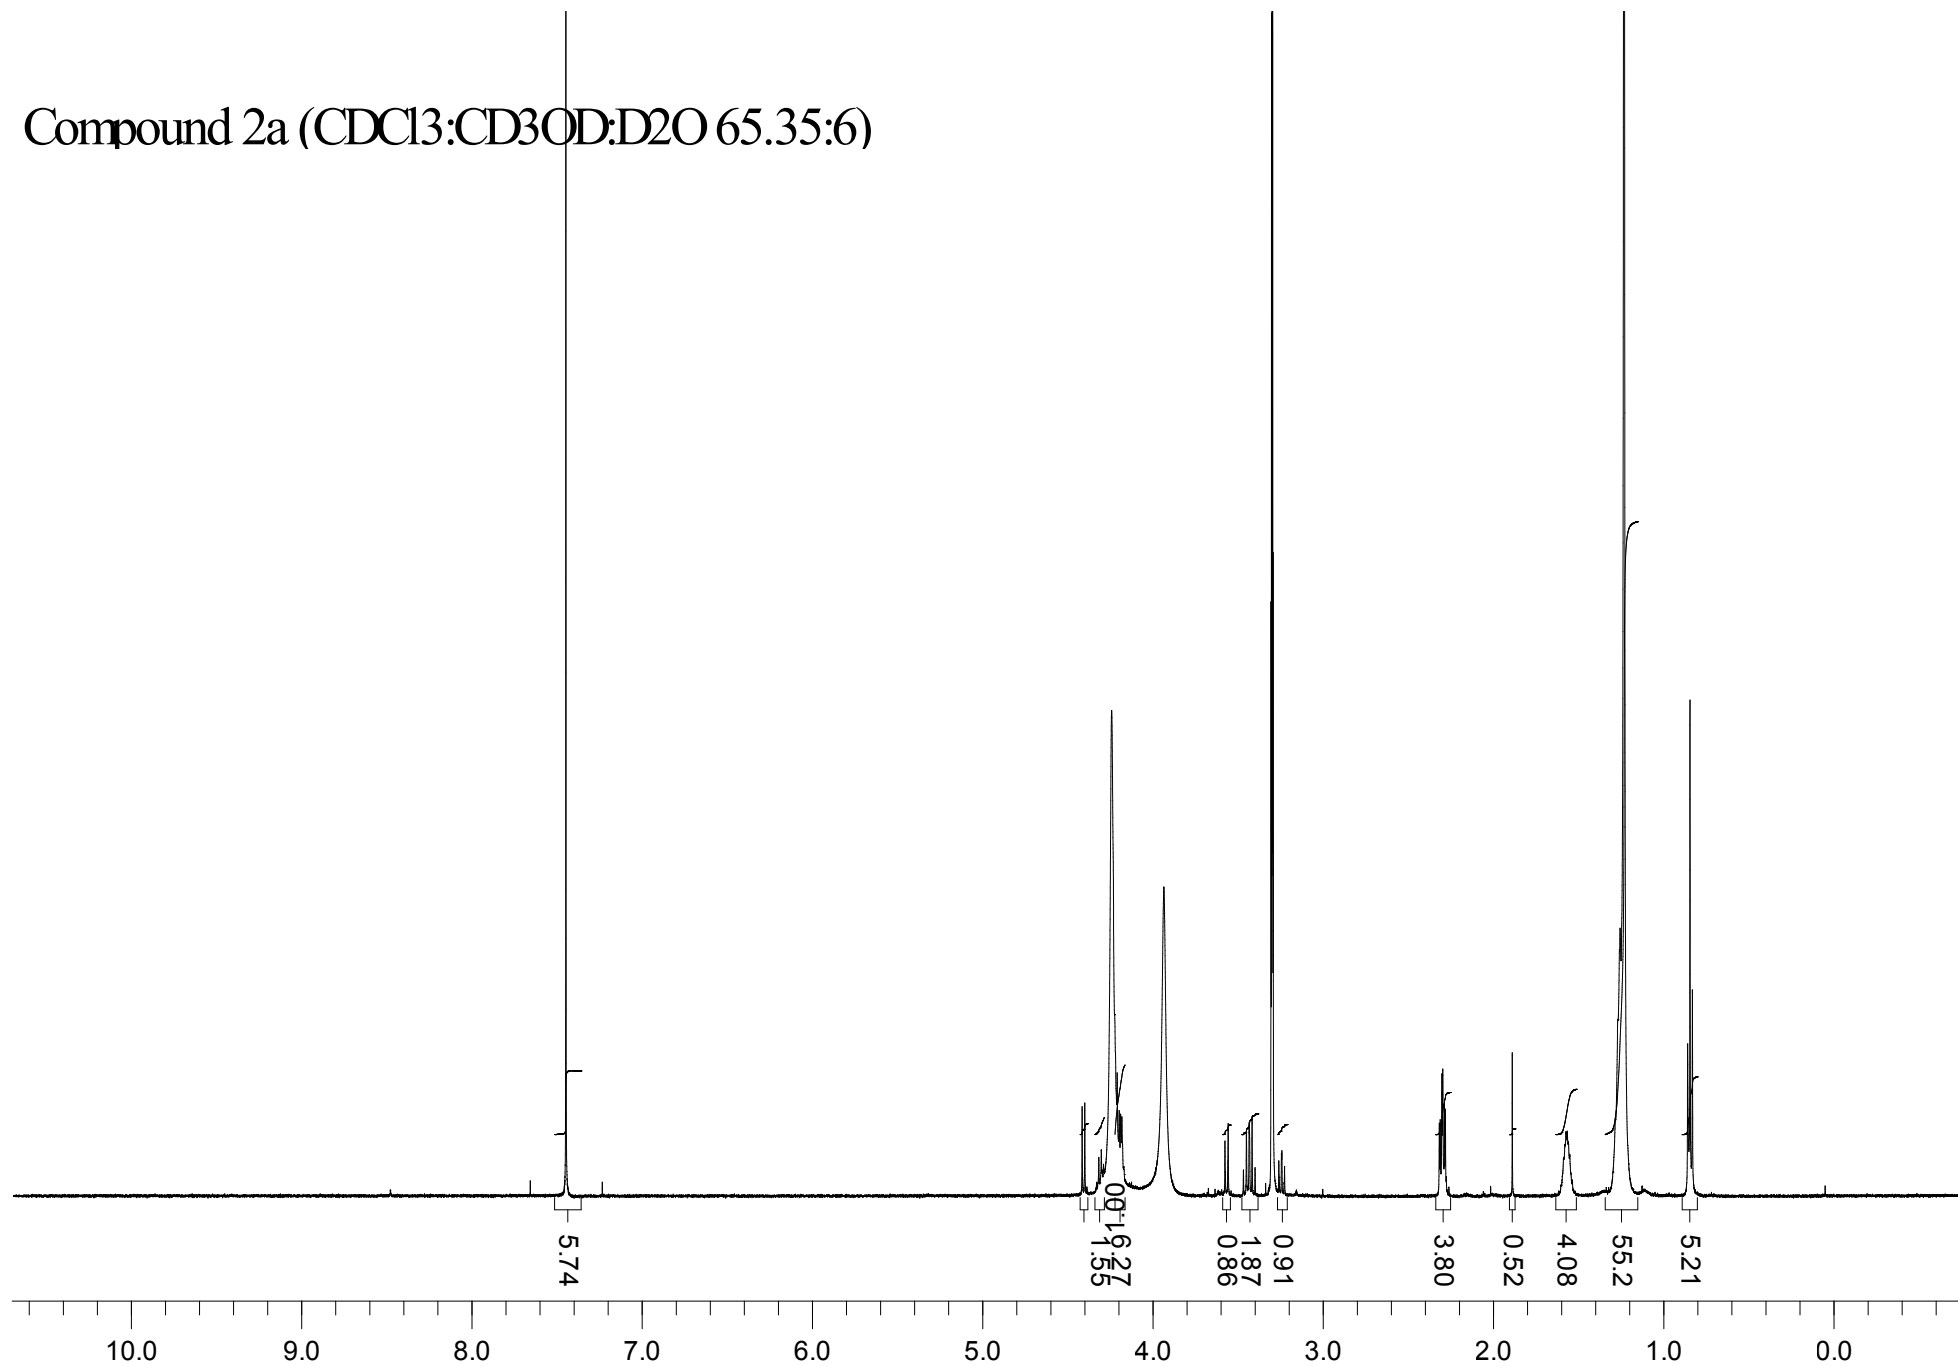

Compound 2a (CDCl<sub>3</sub>:CD<sub>3</sub>OD:D<sub>2</sub>O 65.35:6)

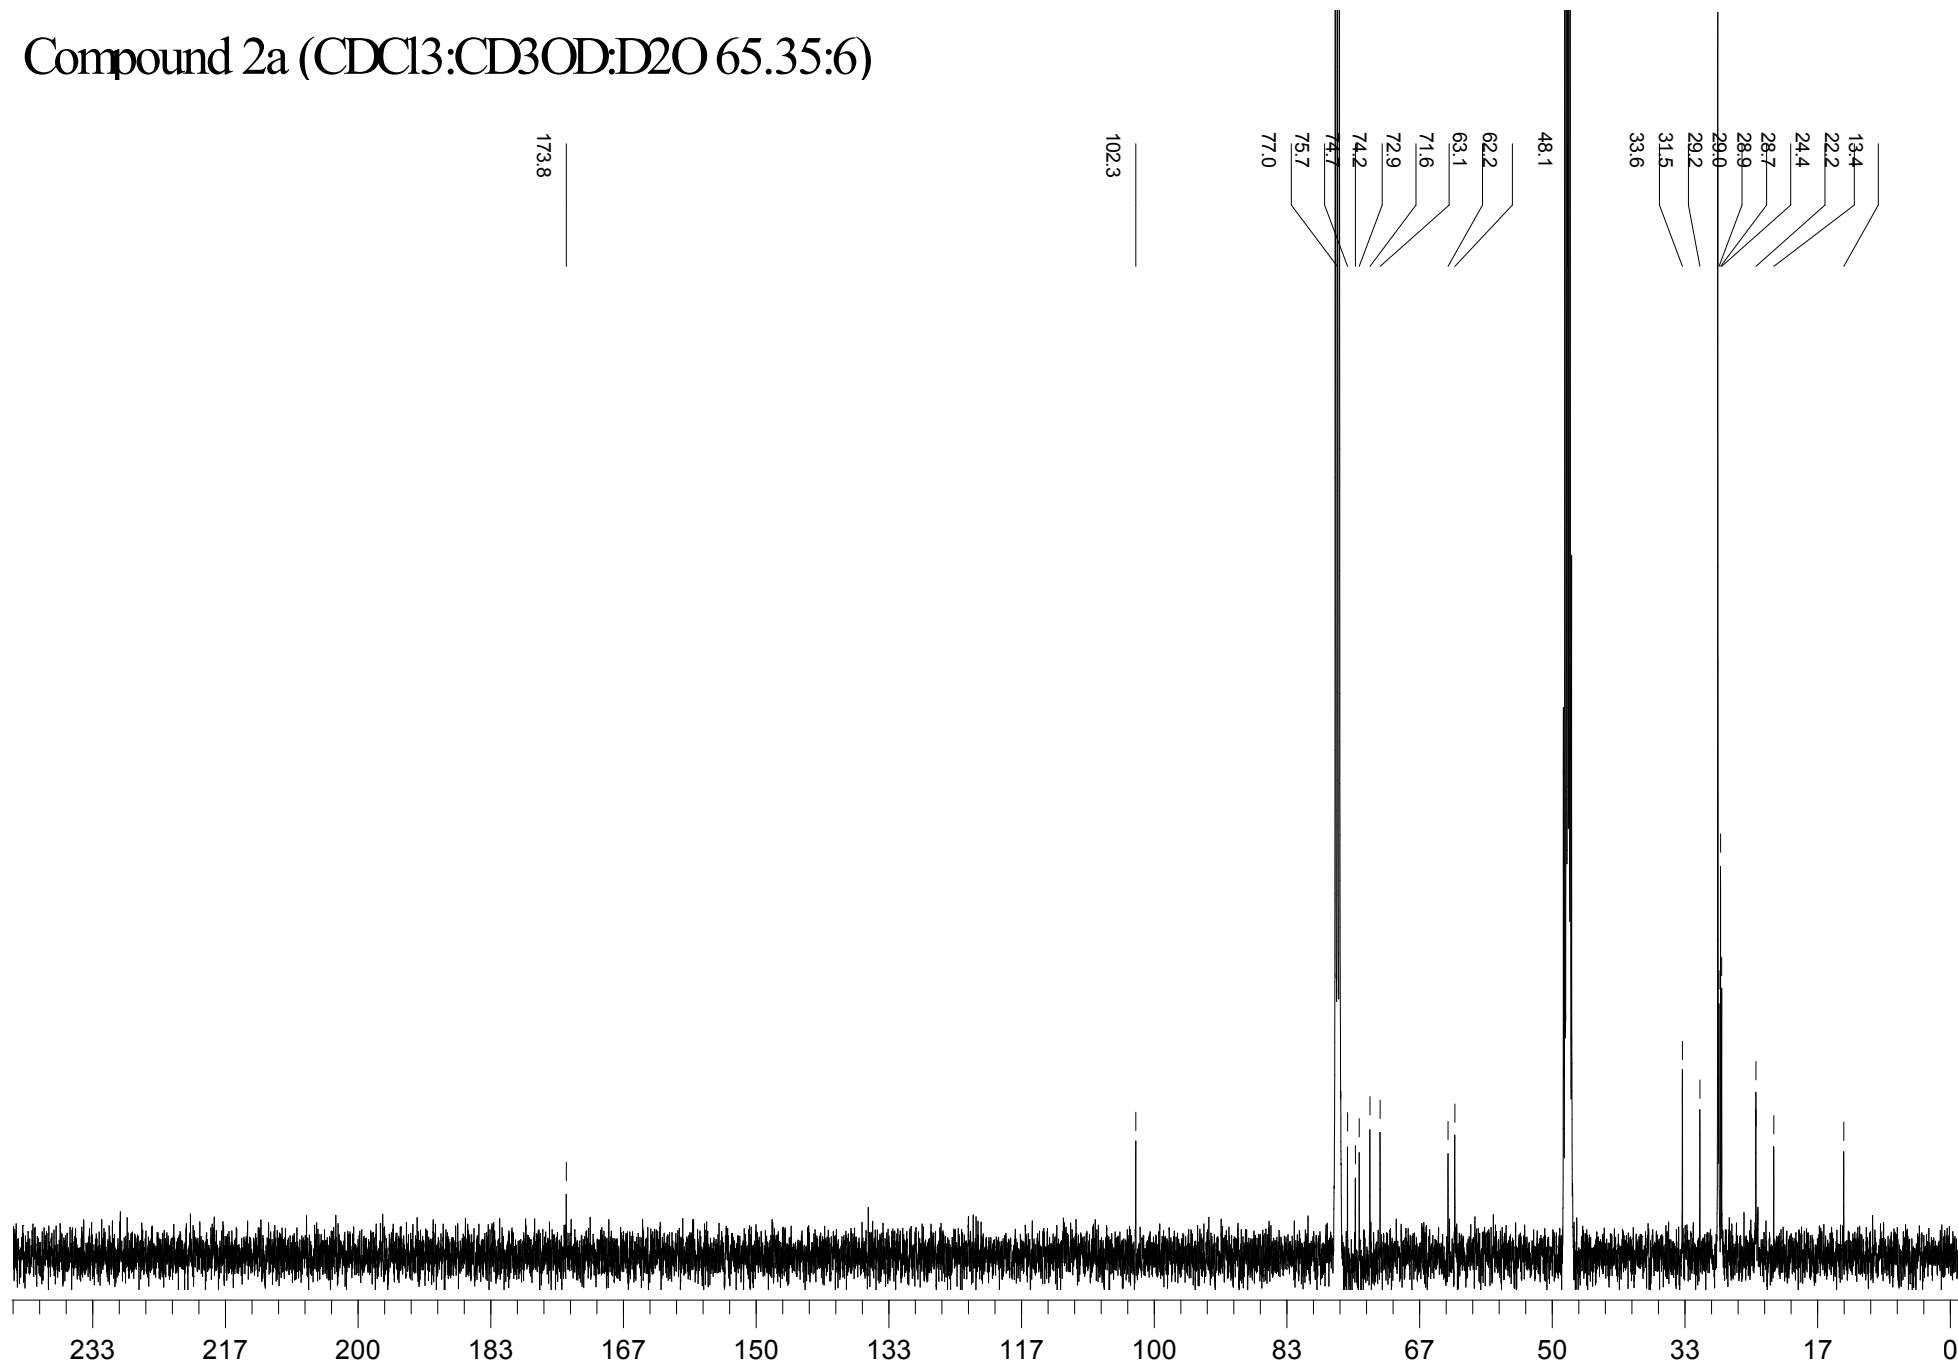

Compound 2b (CD3OD)

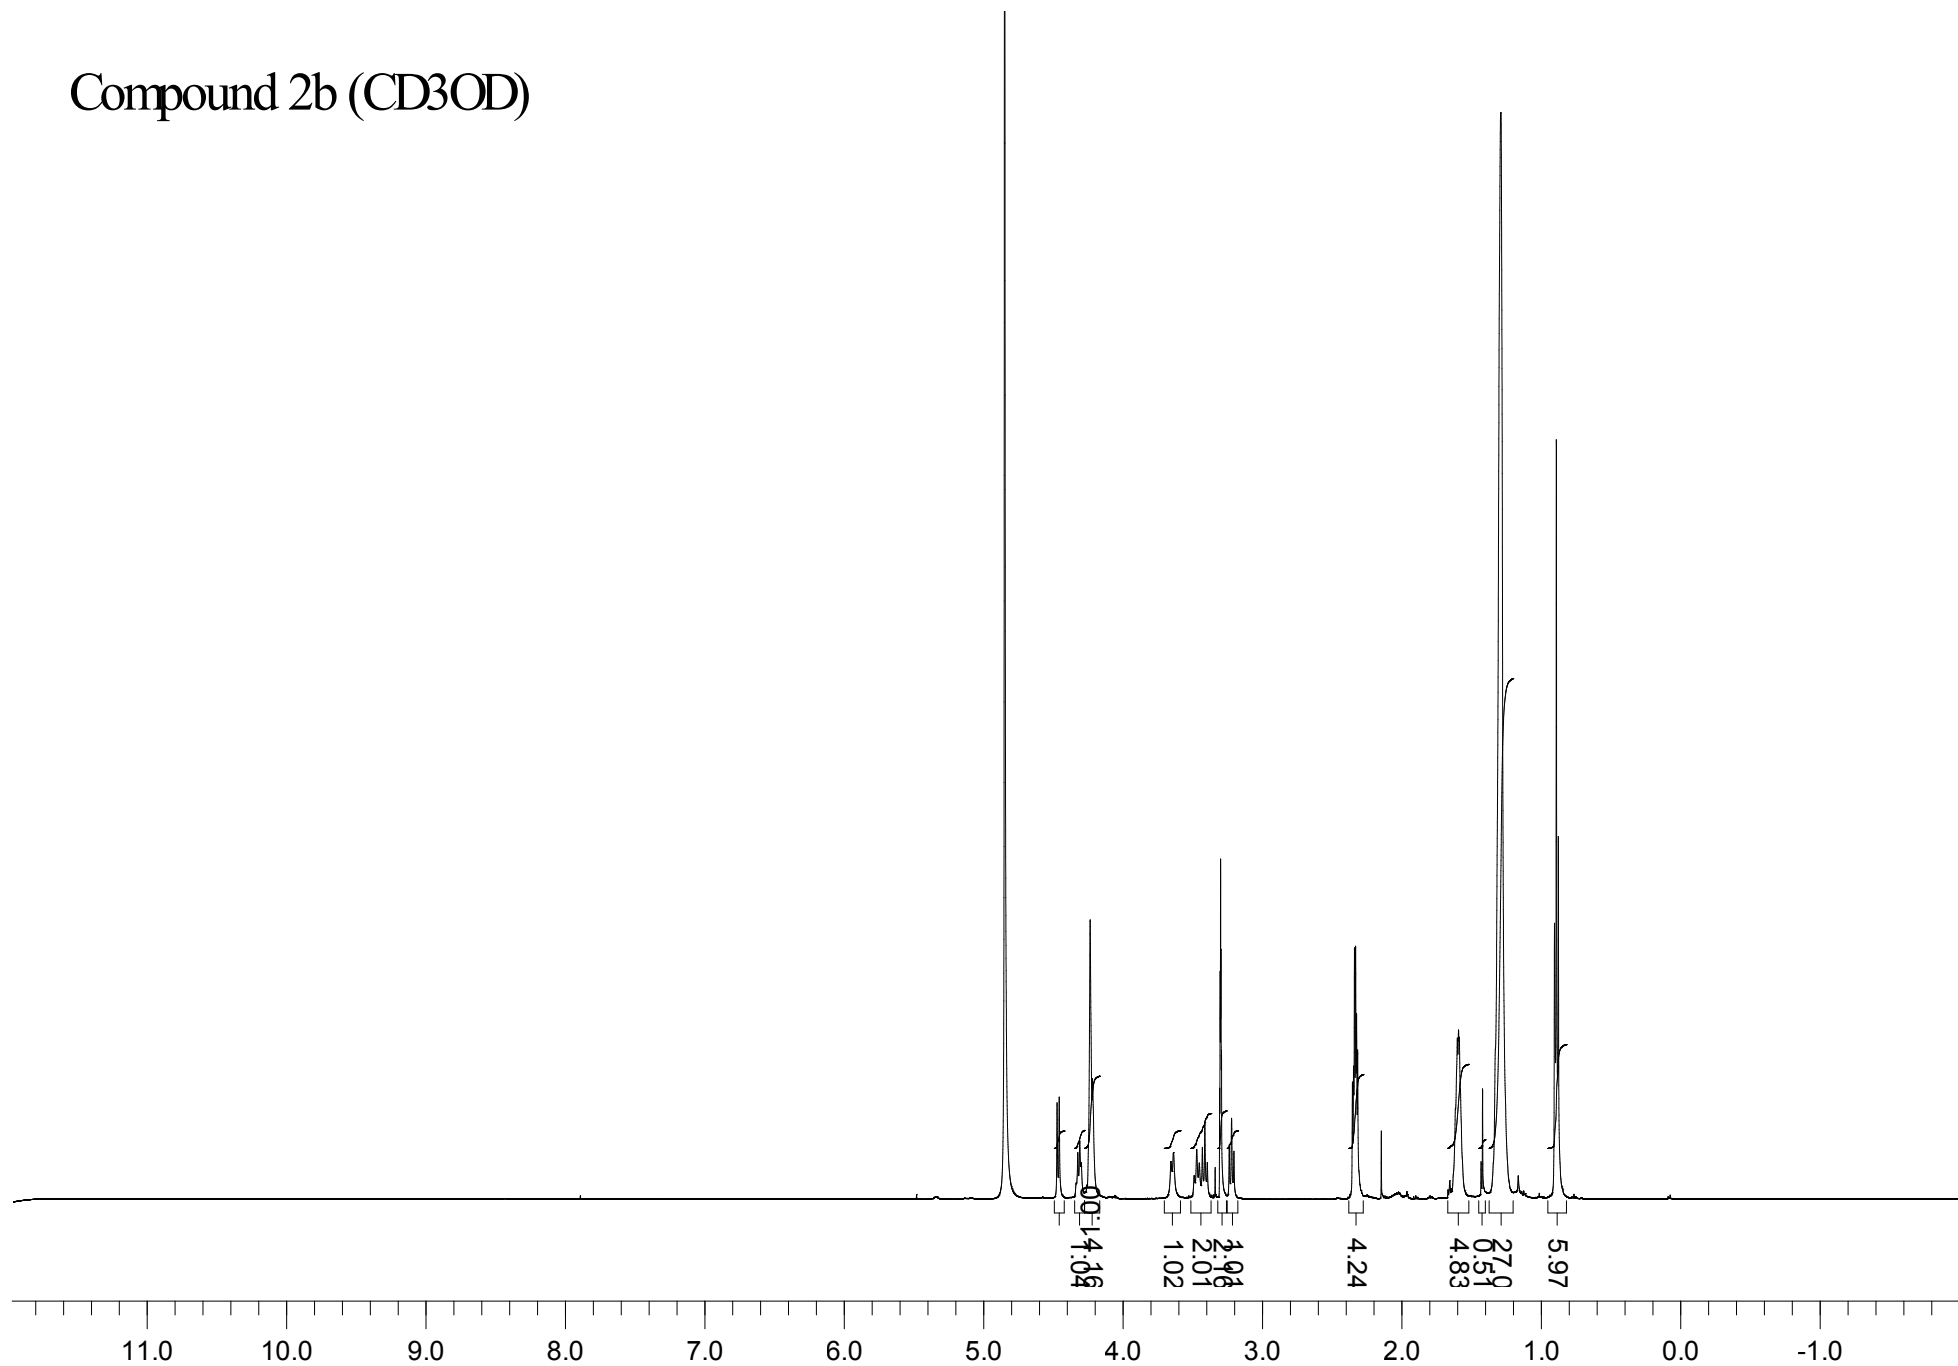



# Compound 2b (CD3OD)

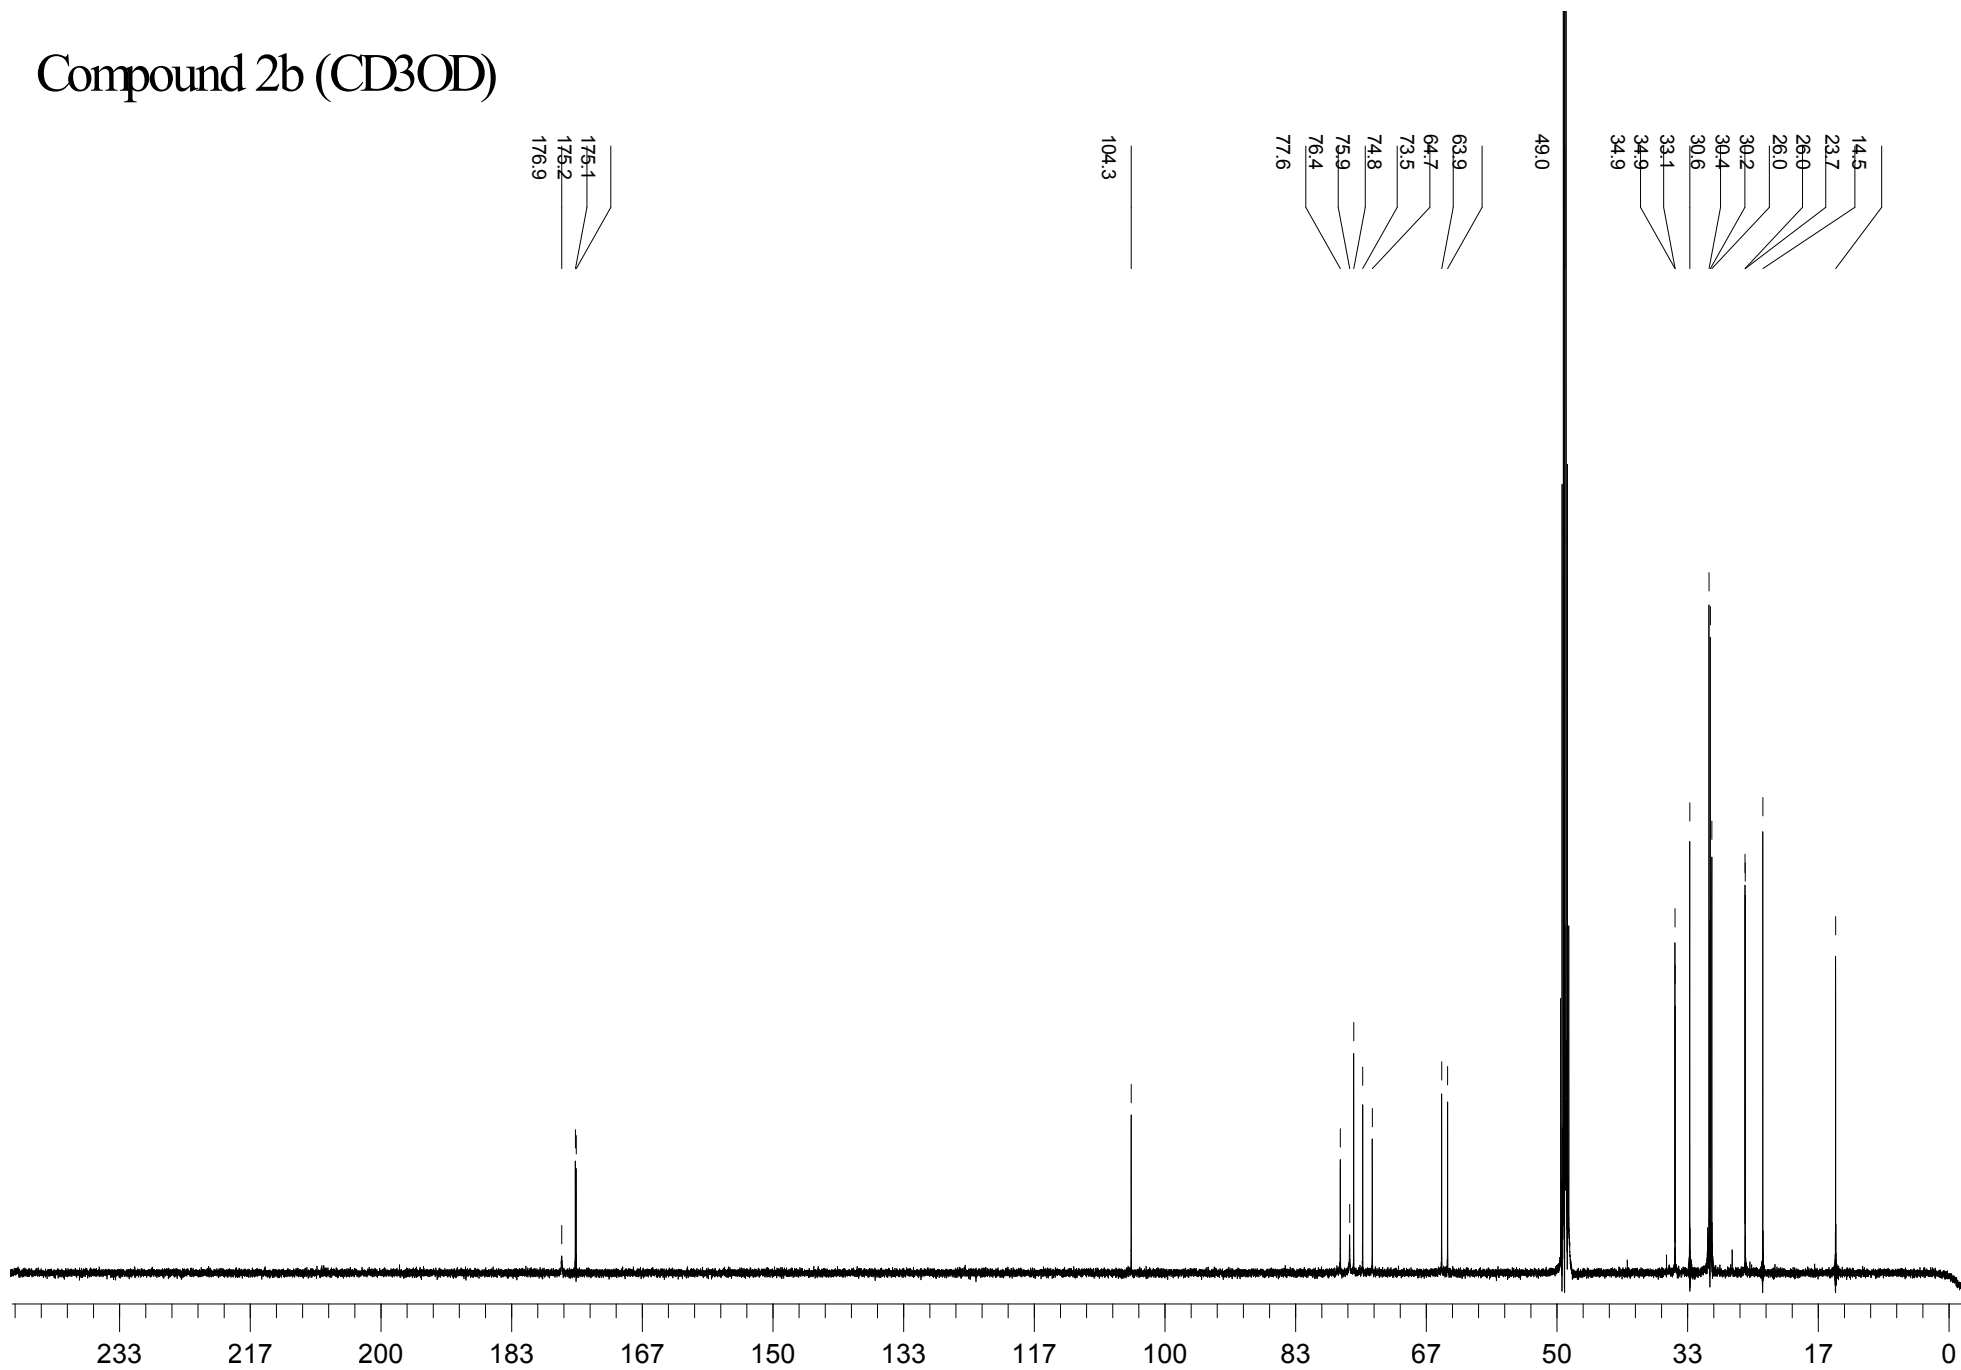

# Compound 3a (CD3OD)

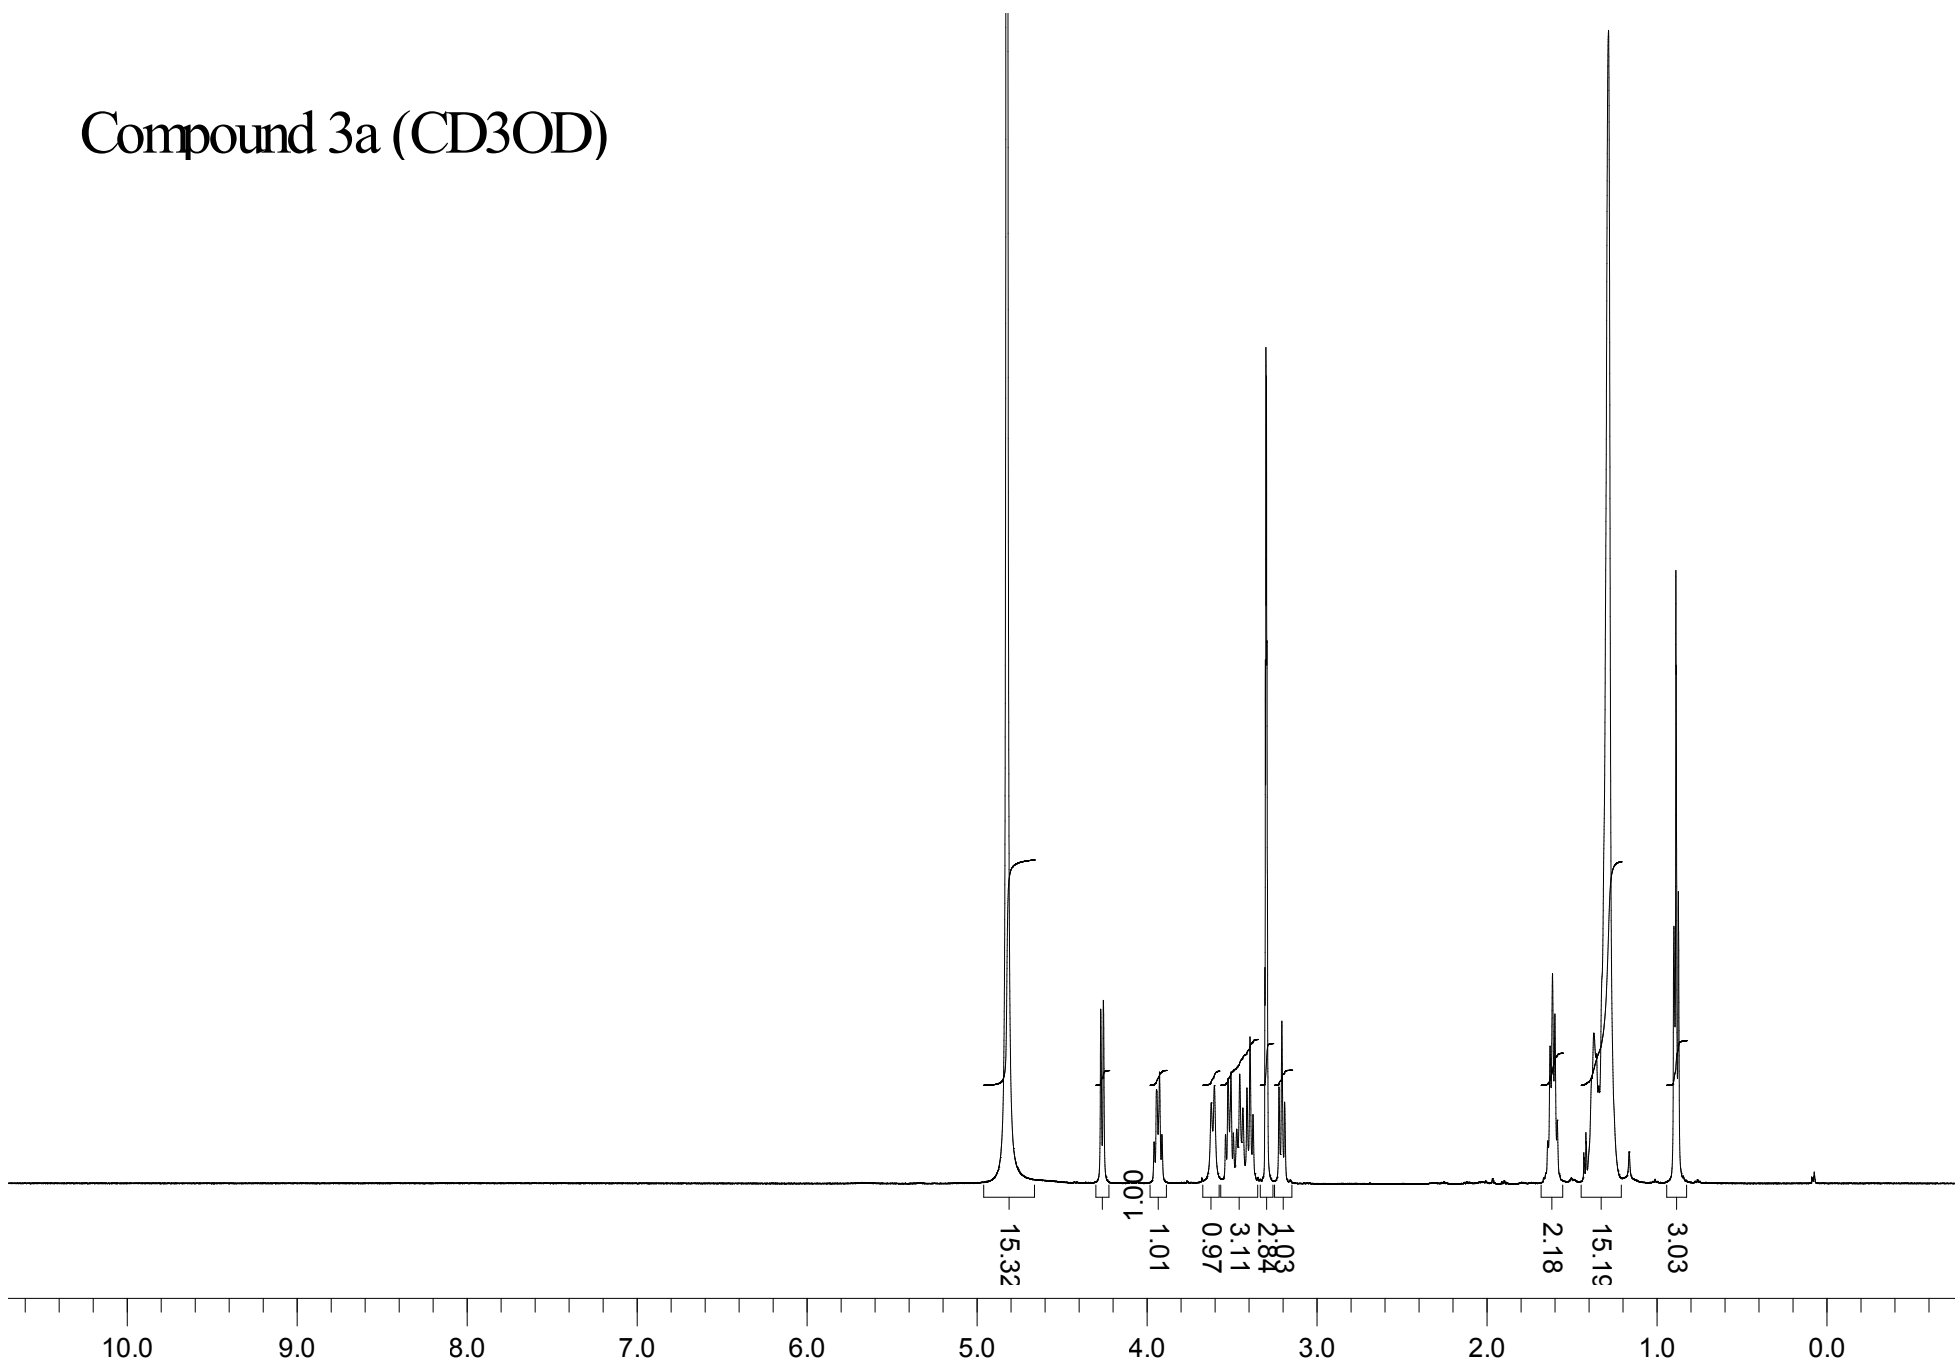

# Compound 3a (CD3OD)

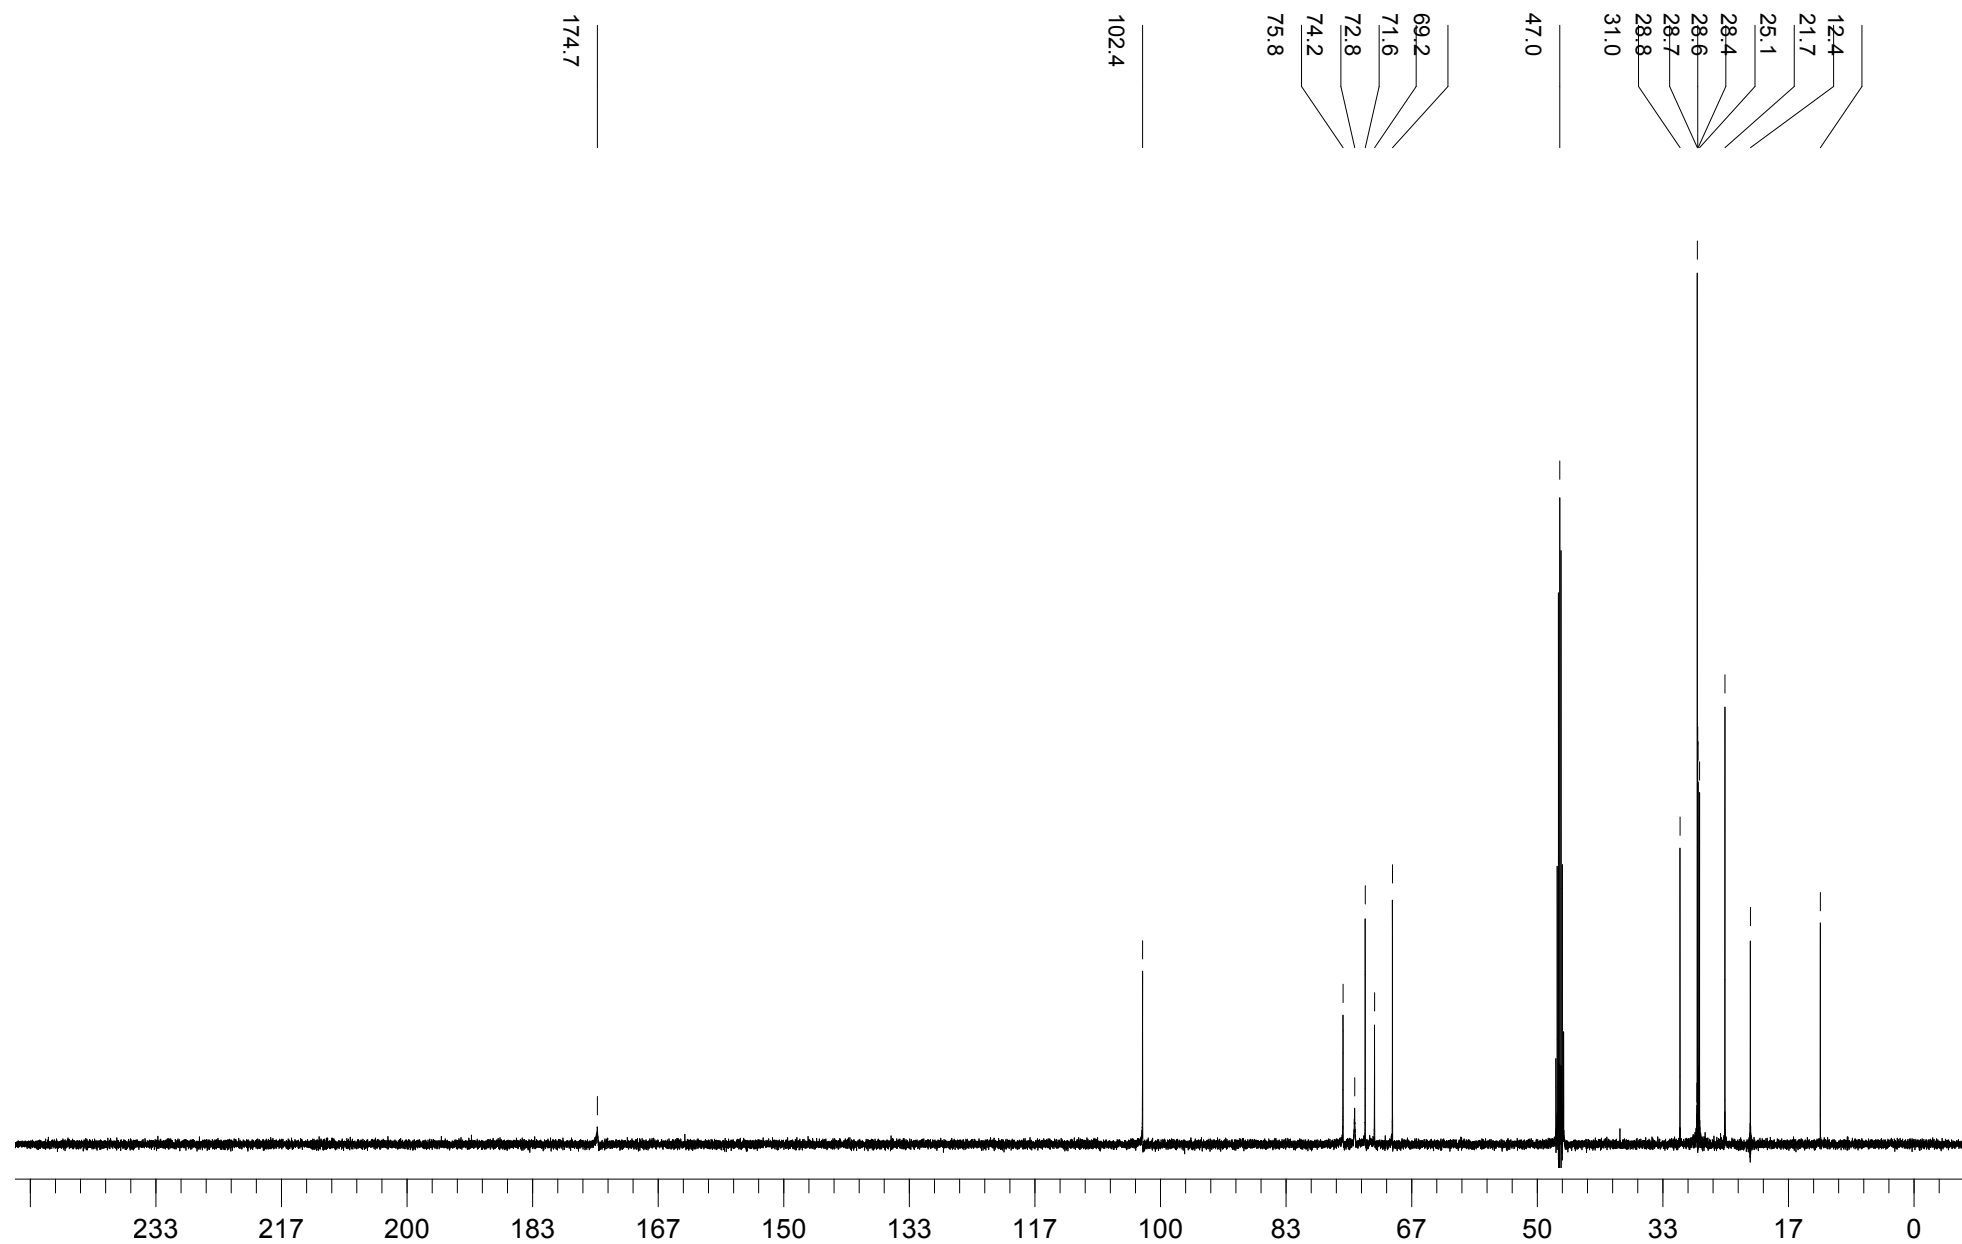

Compound 3b (CD3OD)

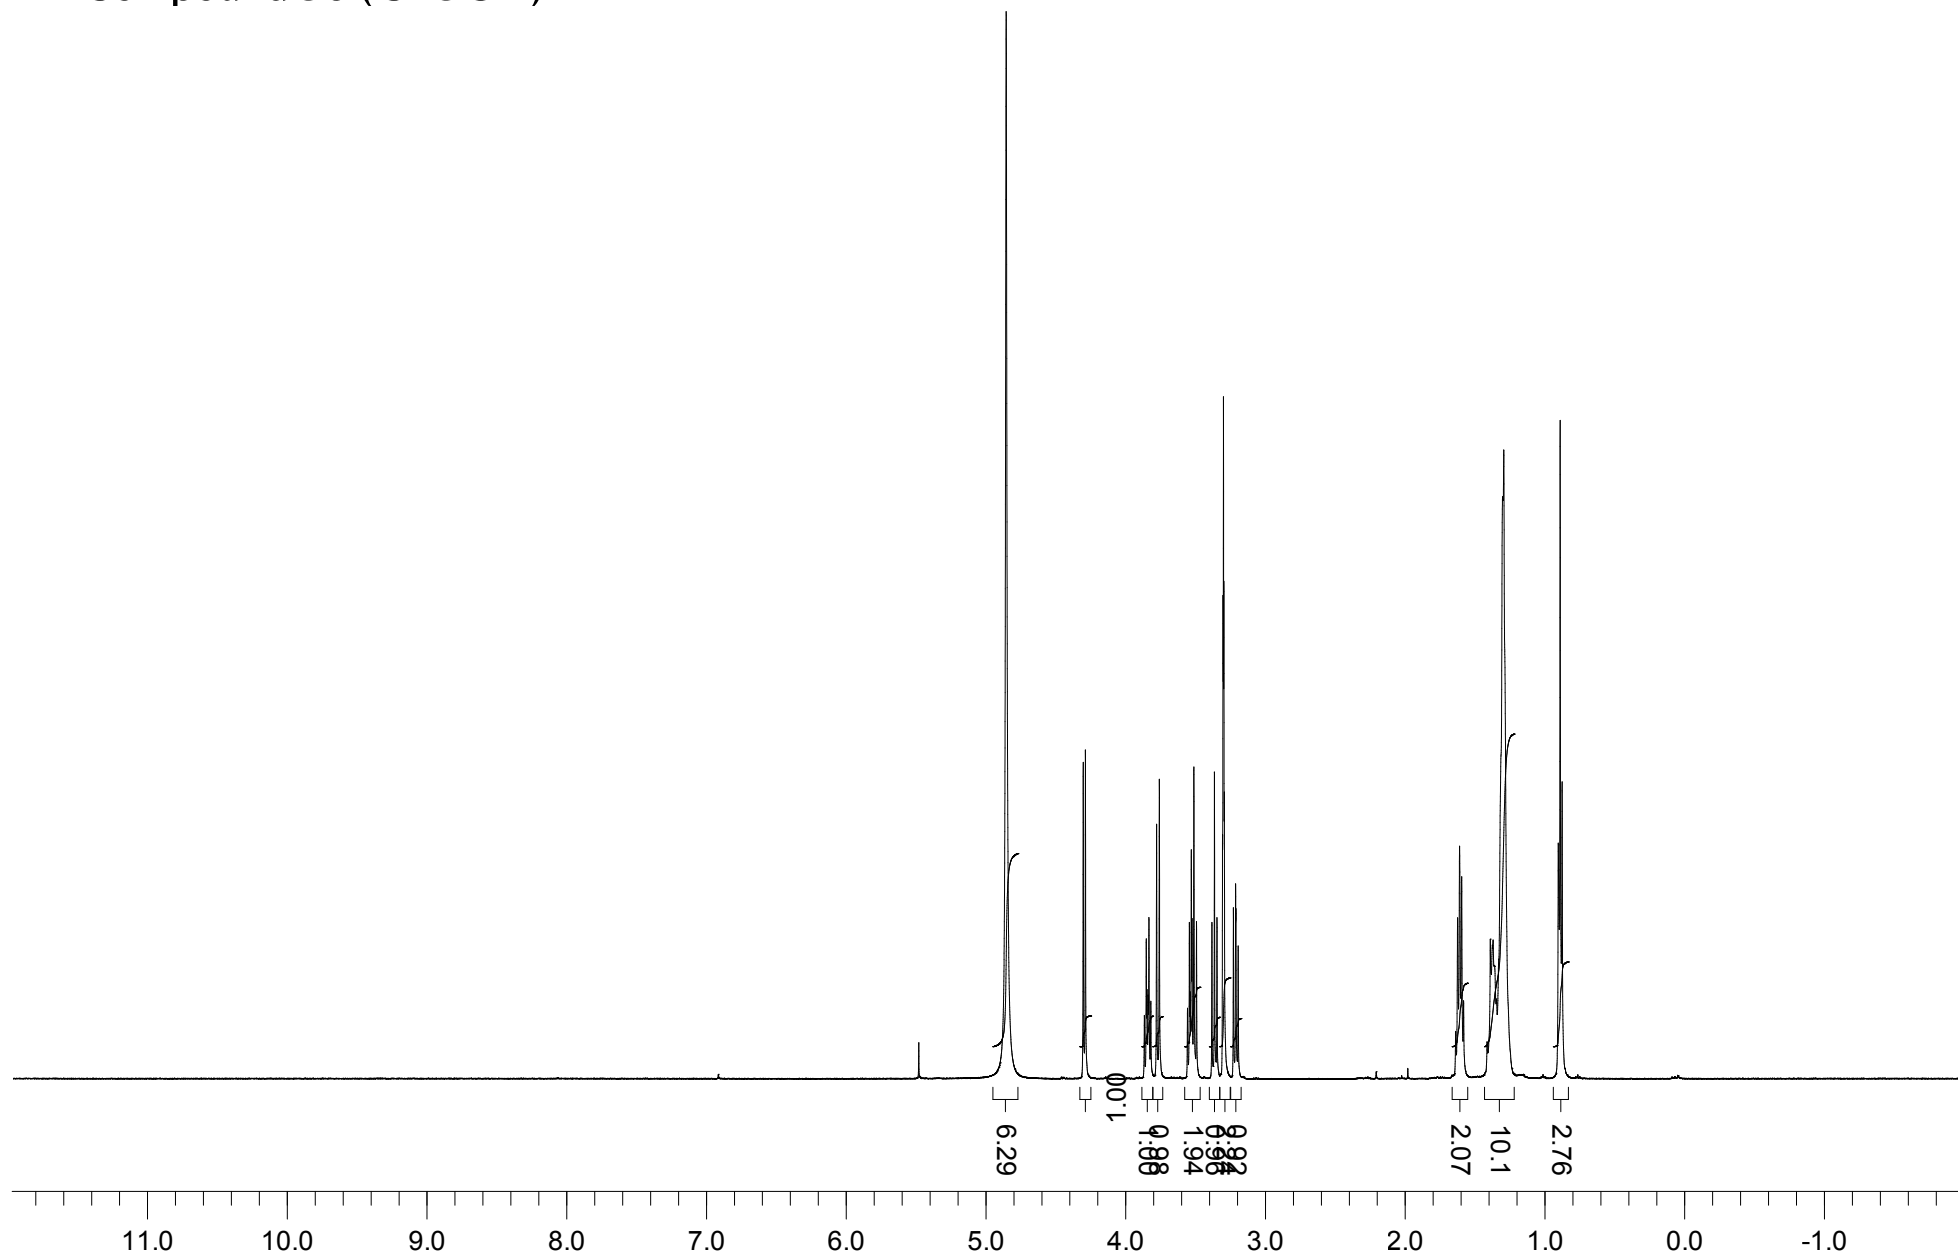

# Compound 3b (CD3OD)

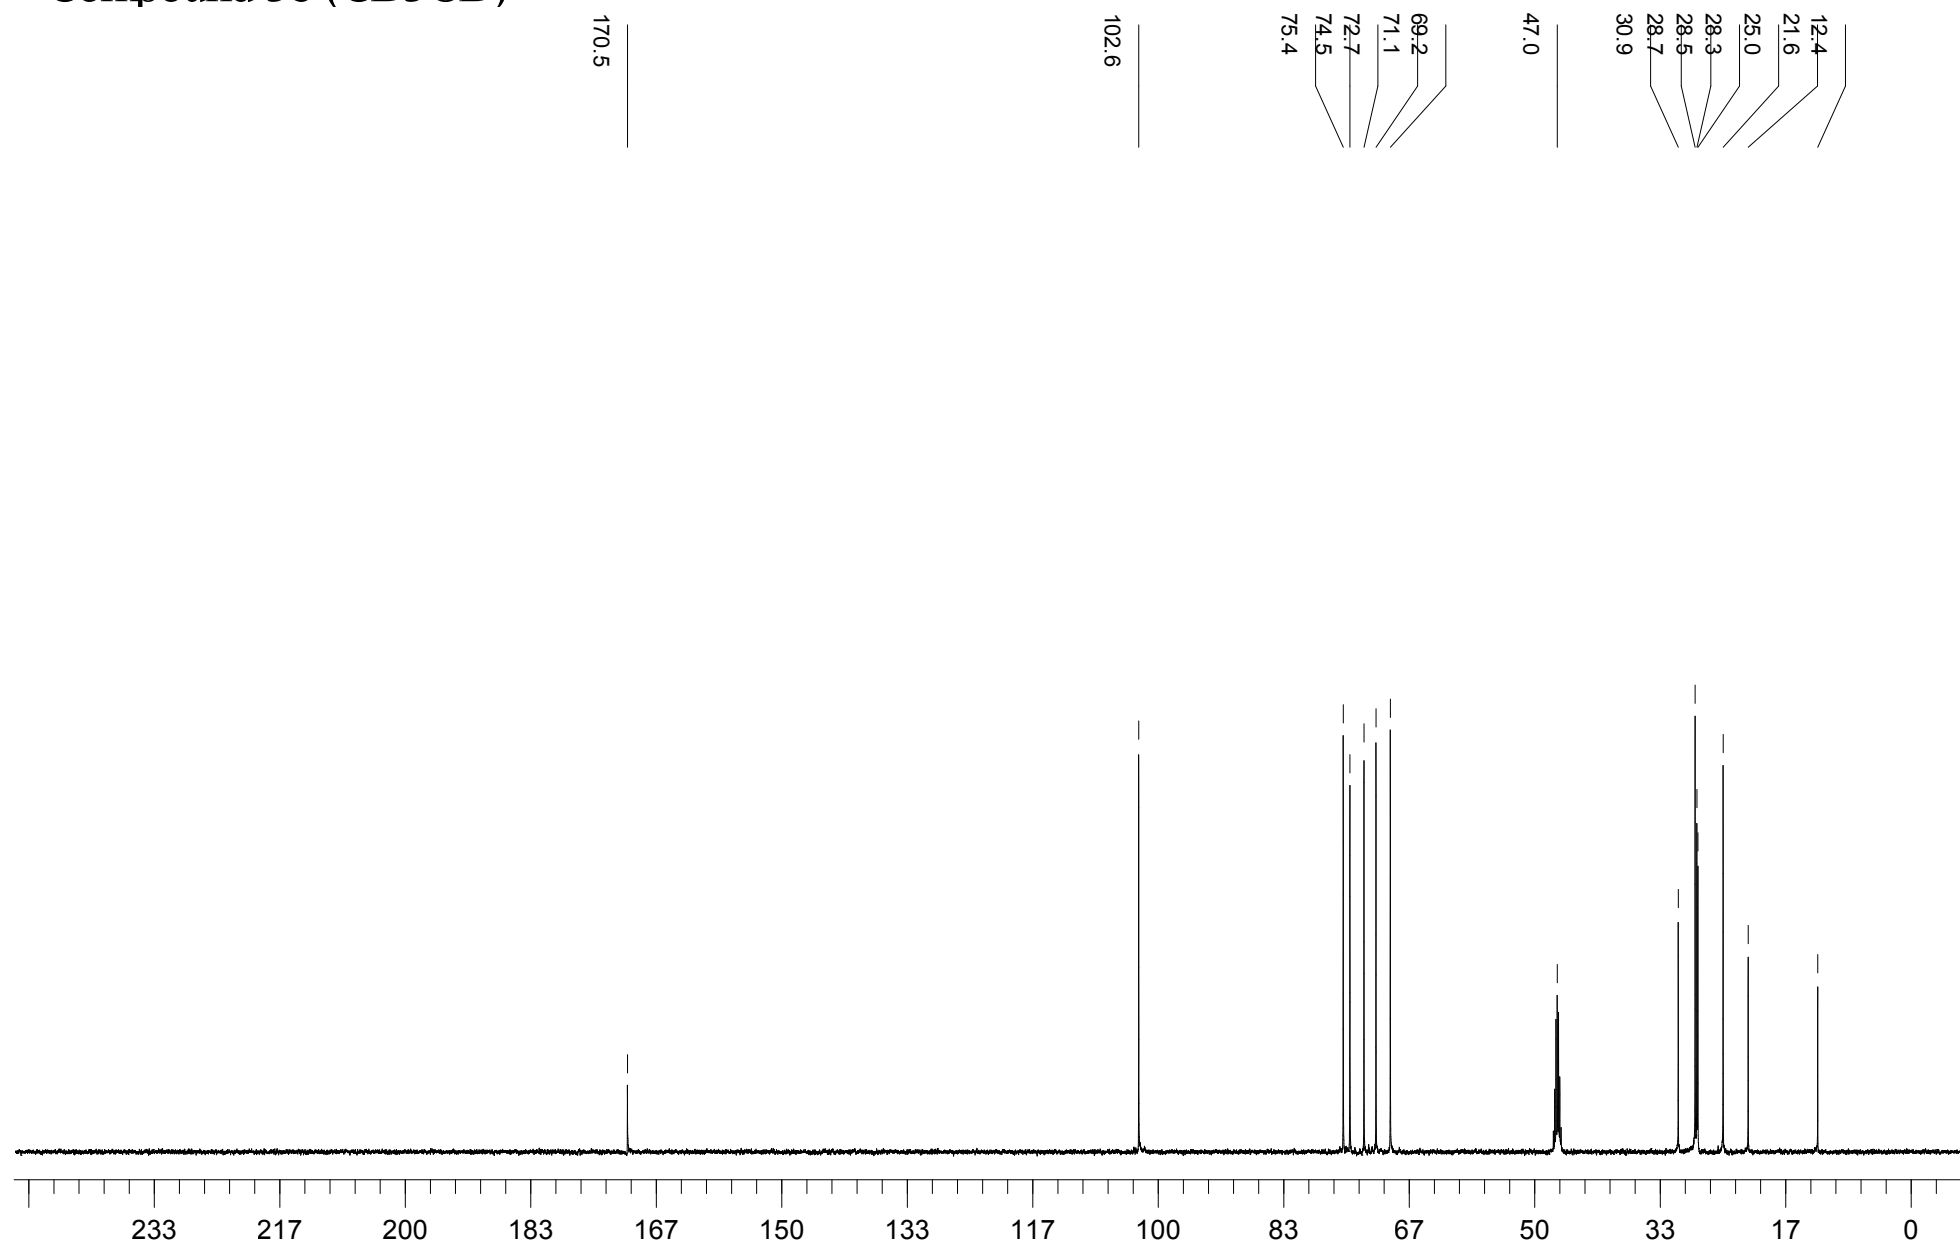

Compound 4a (CDCl<sub>3</sub>)

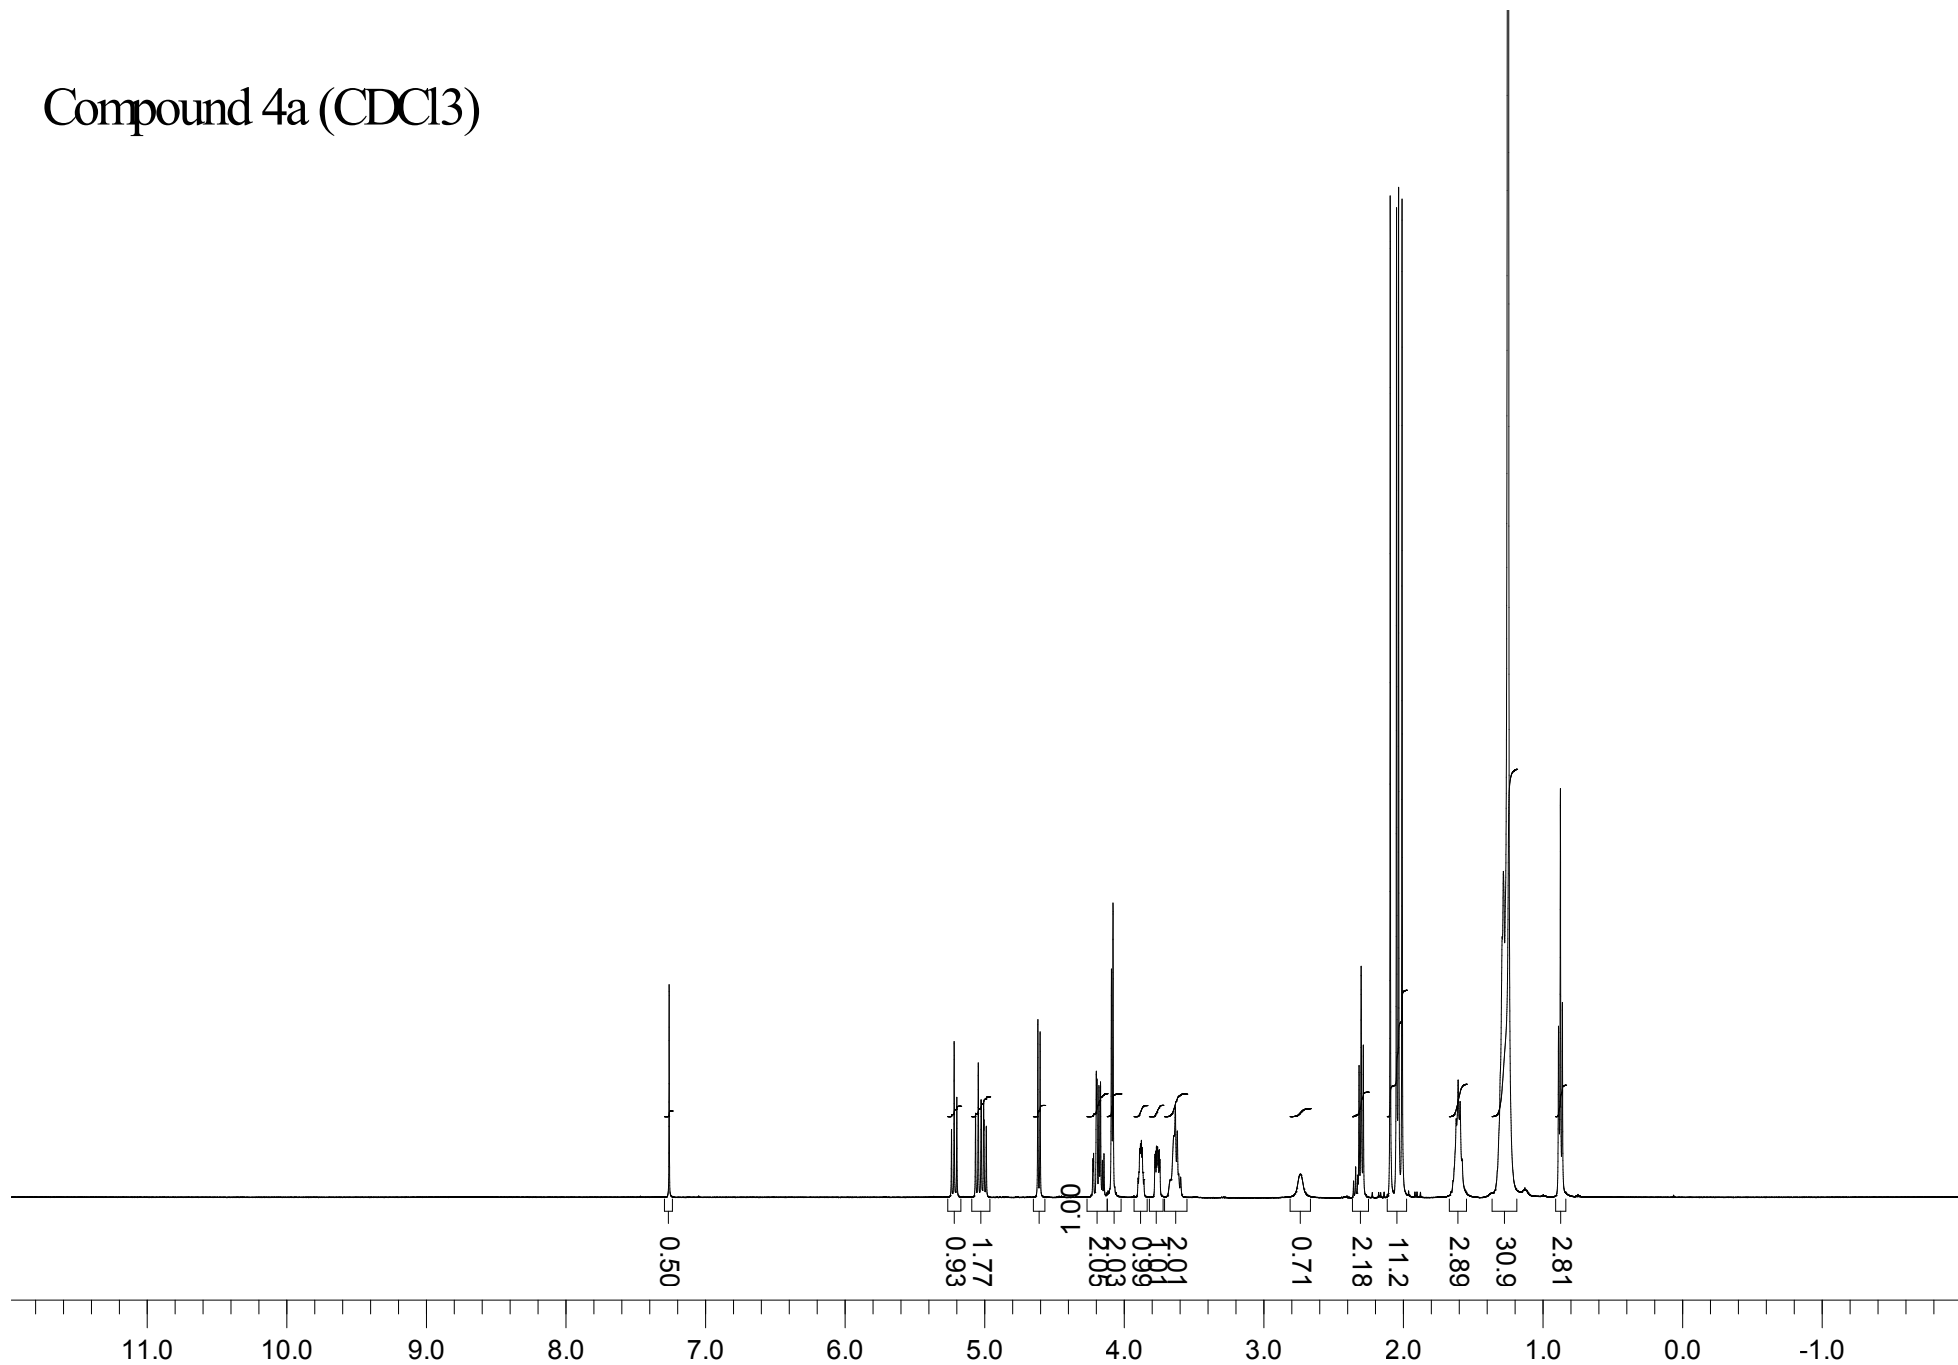

# Compound 4a (CDCl<sub>3</sub>)

169.2  
169.4  
170.2  
170.6  
173.4

101.2

81.5  
77.3  
77.0  
76.8  
72.5  
72.0  
71.2  
68.4  
63.1  
62.8  
61.9  
34.1  
31.9  
29.7  
29.6  
29.5  
29.4  
29.3  
29.2  
24.9  
22.7  
20.6  
20.4

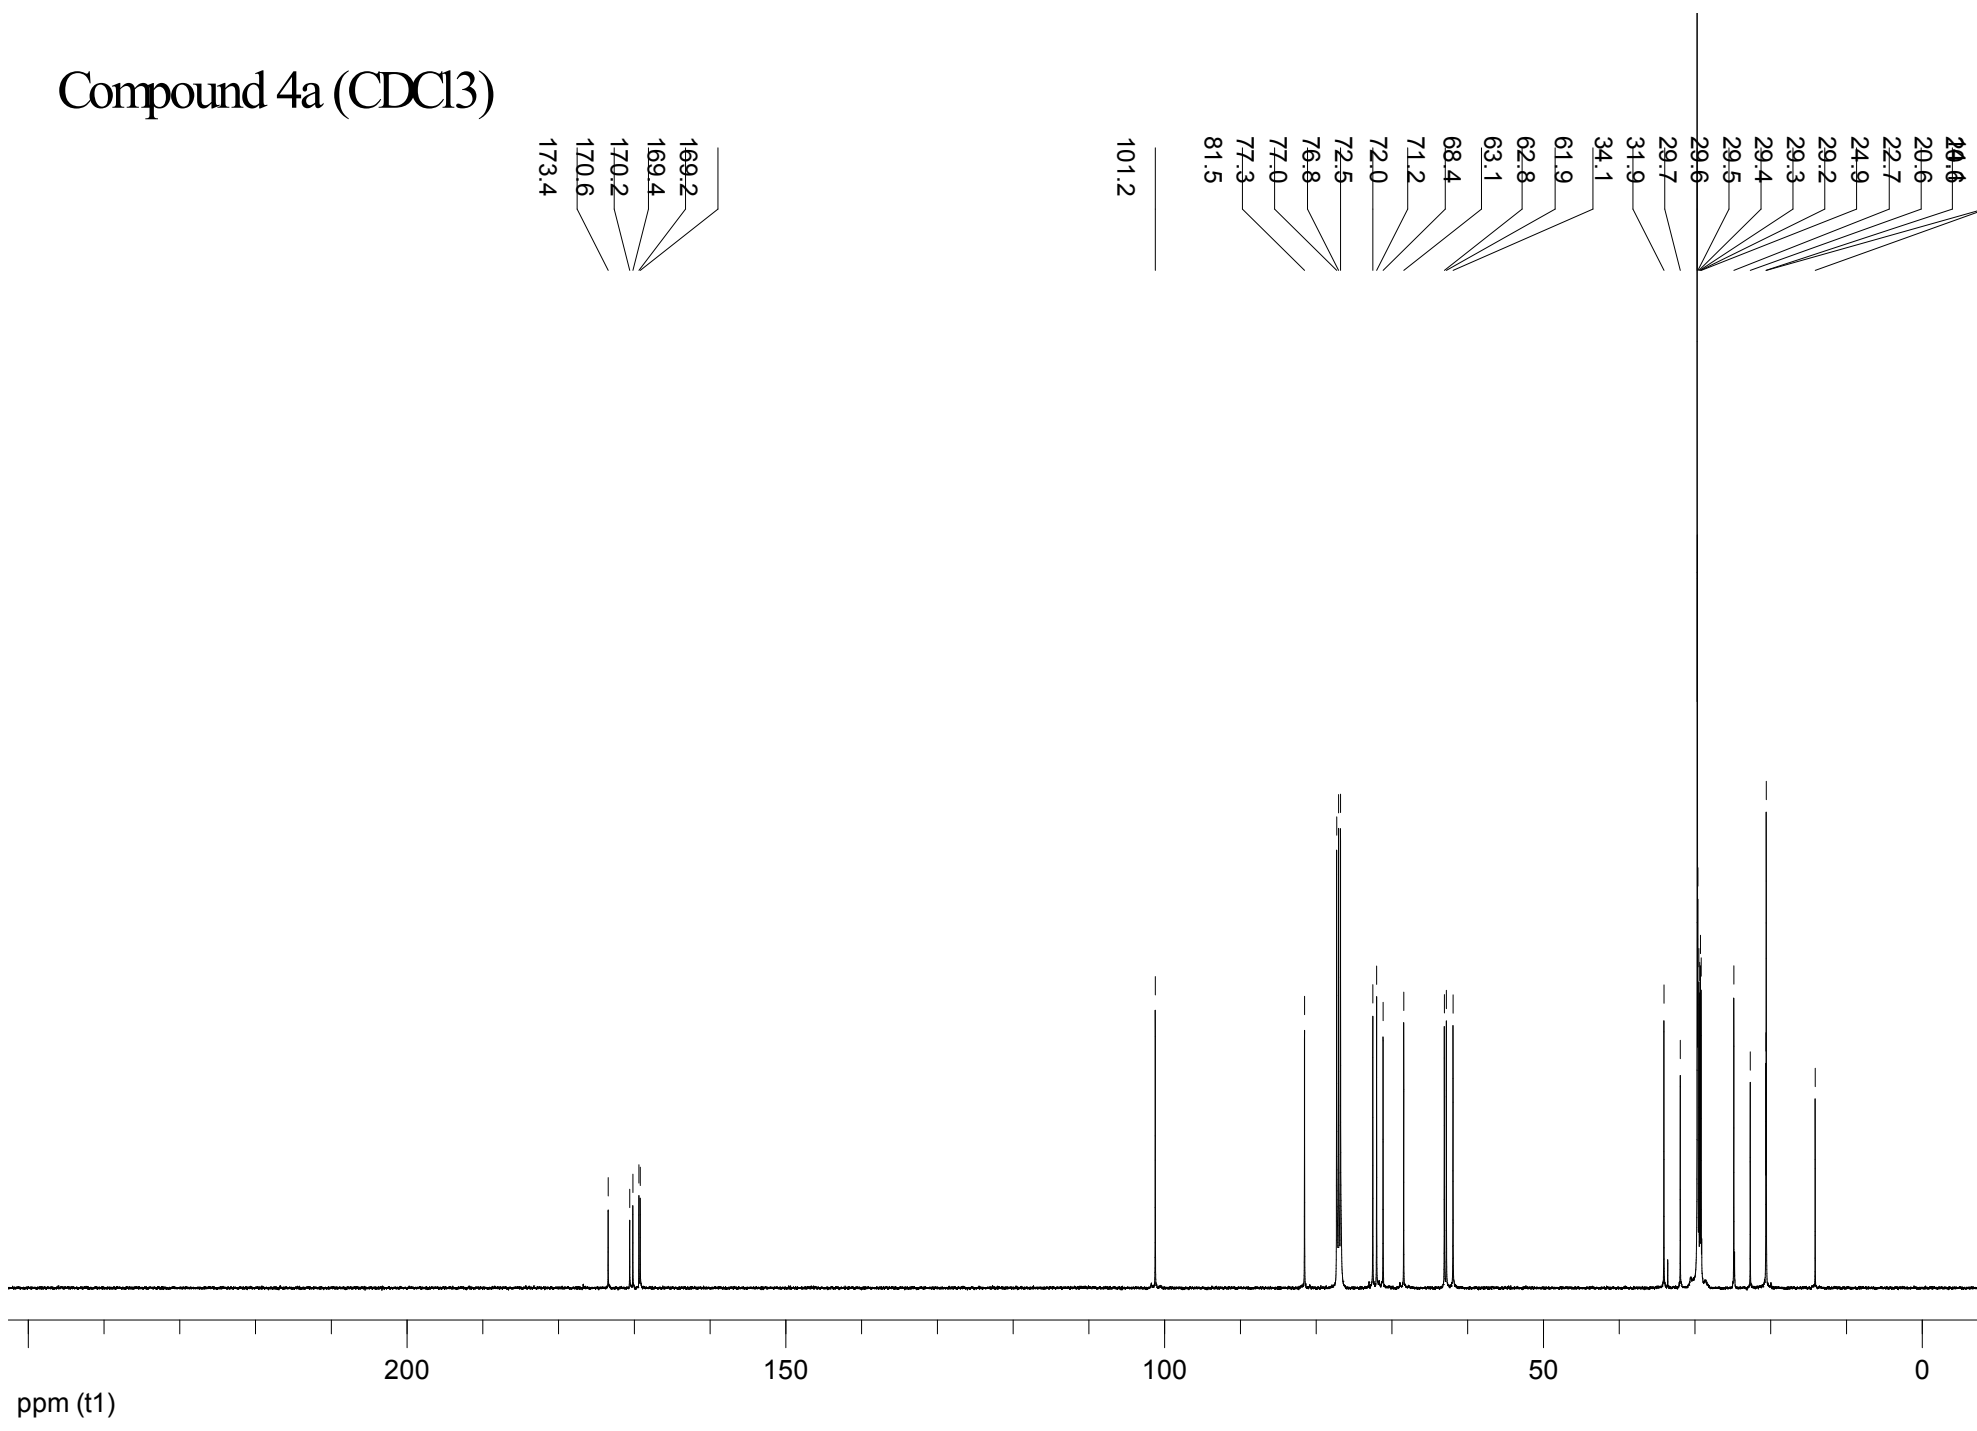

Compound 4b (CDCl<sub>3</sub>)

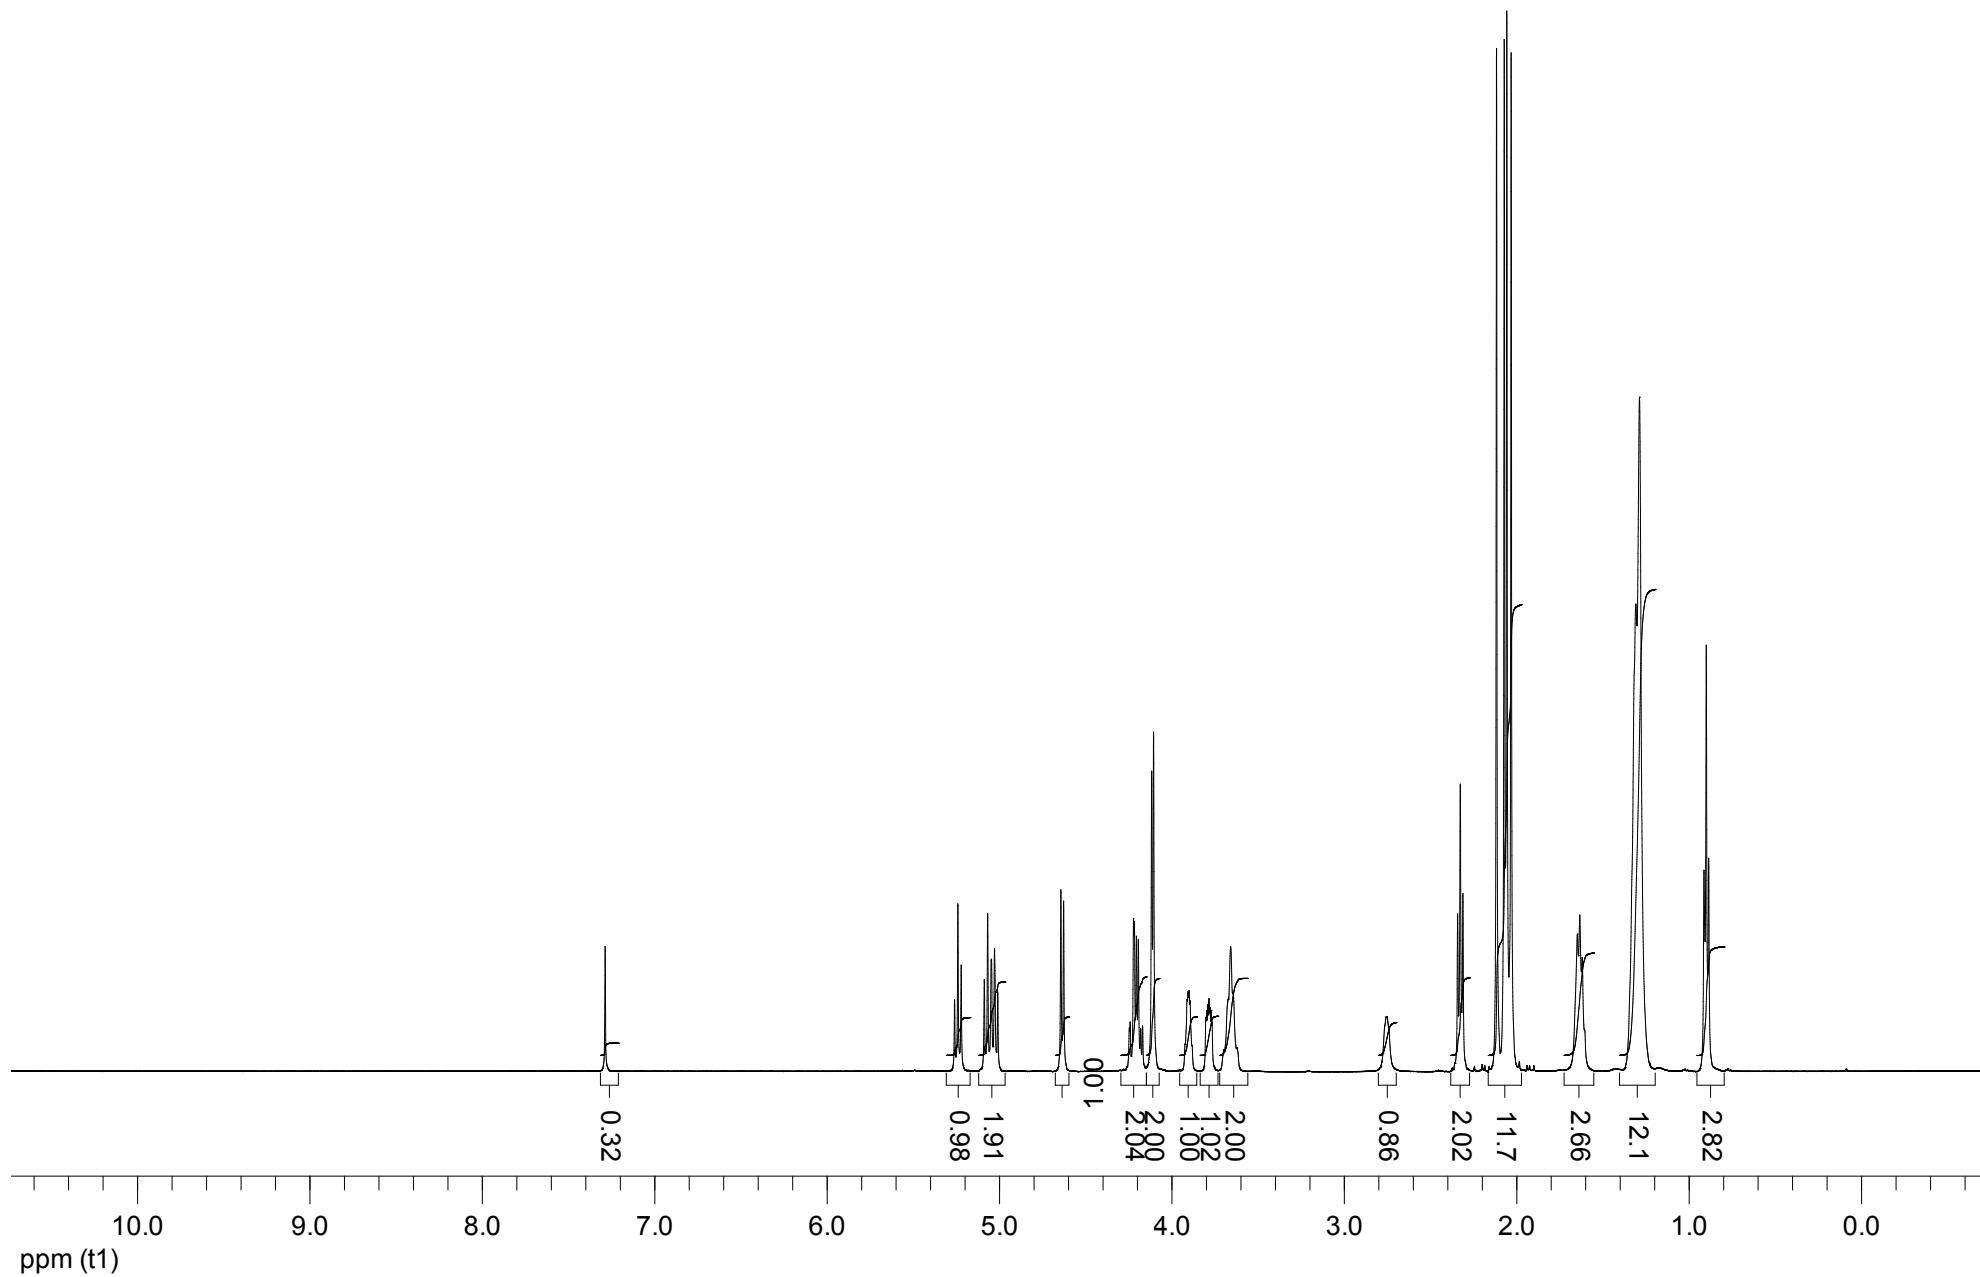



# Compound 4b (CDCl<sub>3</sub>)

169.2  
169.4  
170.2  
170.6  
173.4

14.1  
20.6  
20.6  
20.6  
22.7  
24.9  
29.1  
29.2  
29.4  
34.8  
34.1  
61.9  
62.8  
63.1  
68.4  
71.2  
72.0  
72.5  
76.8  
77.0  
77.3  
81.5  
101.2

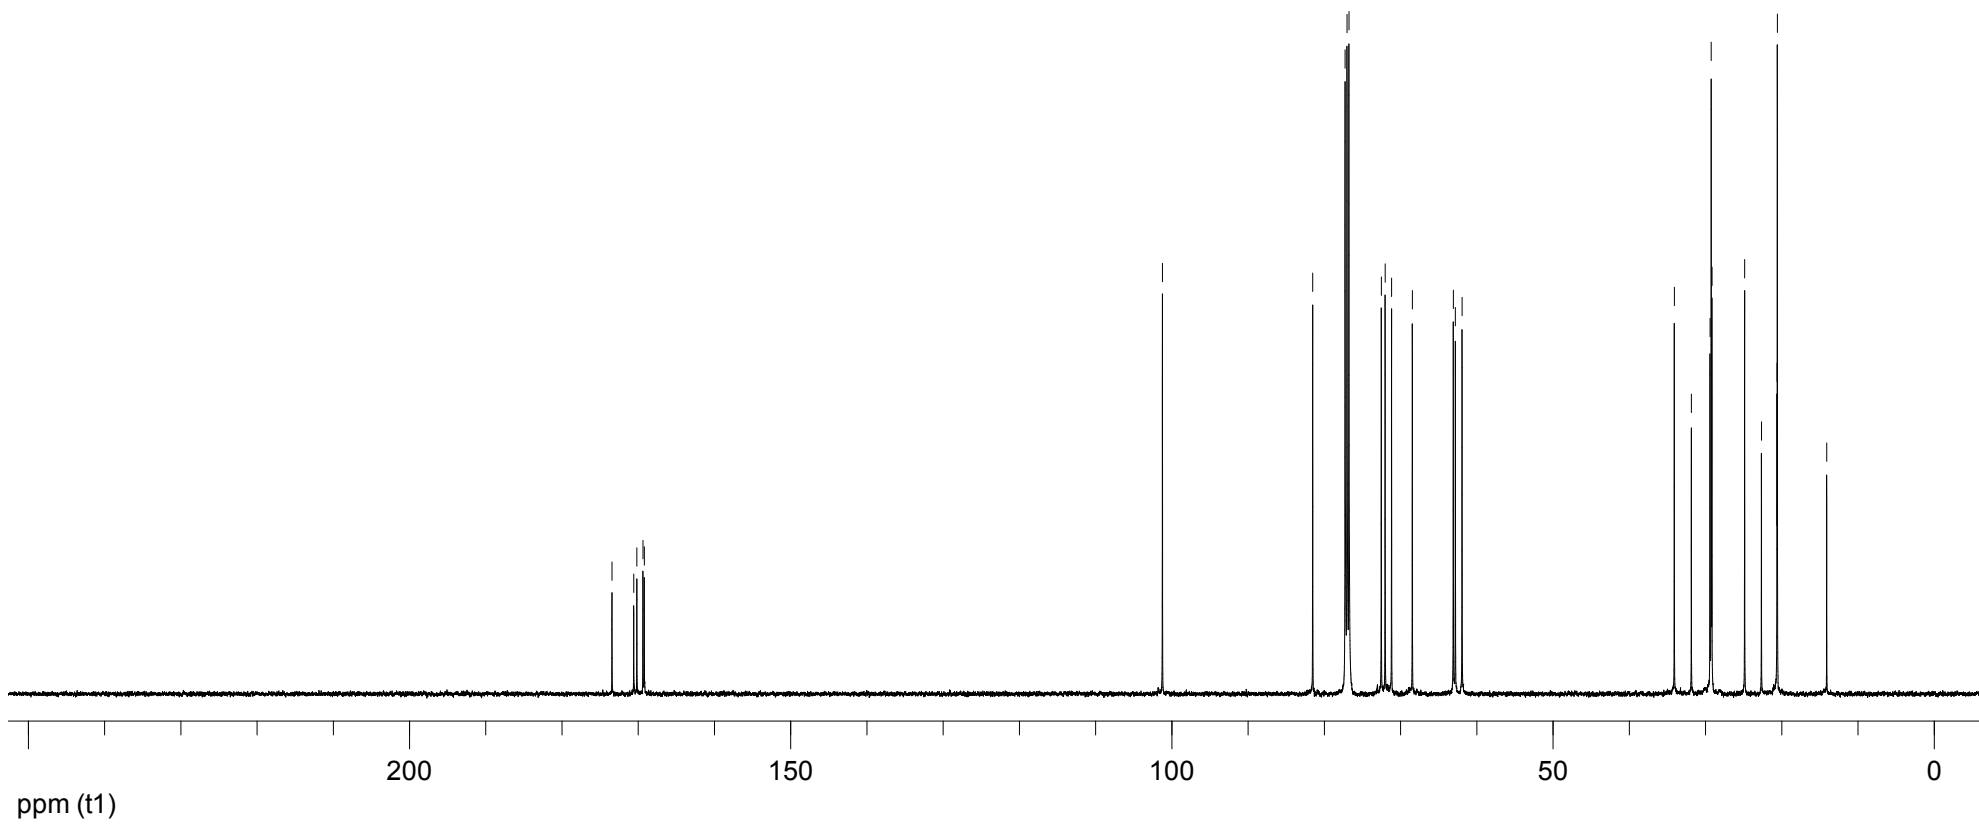

# Compound 5a (Pyd5)

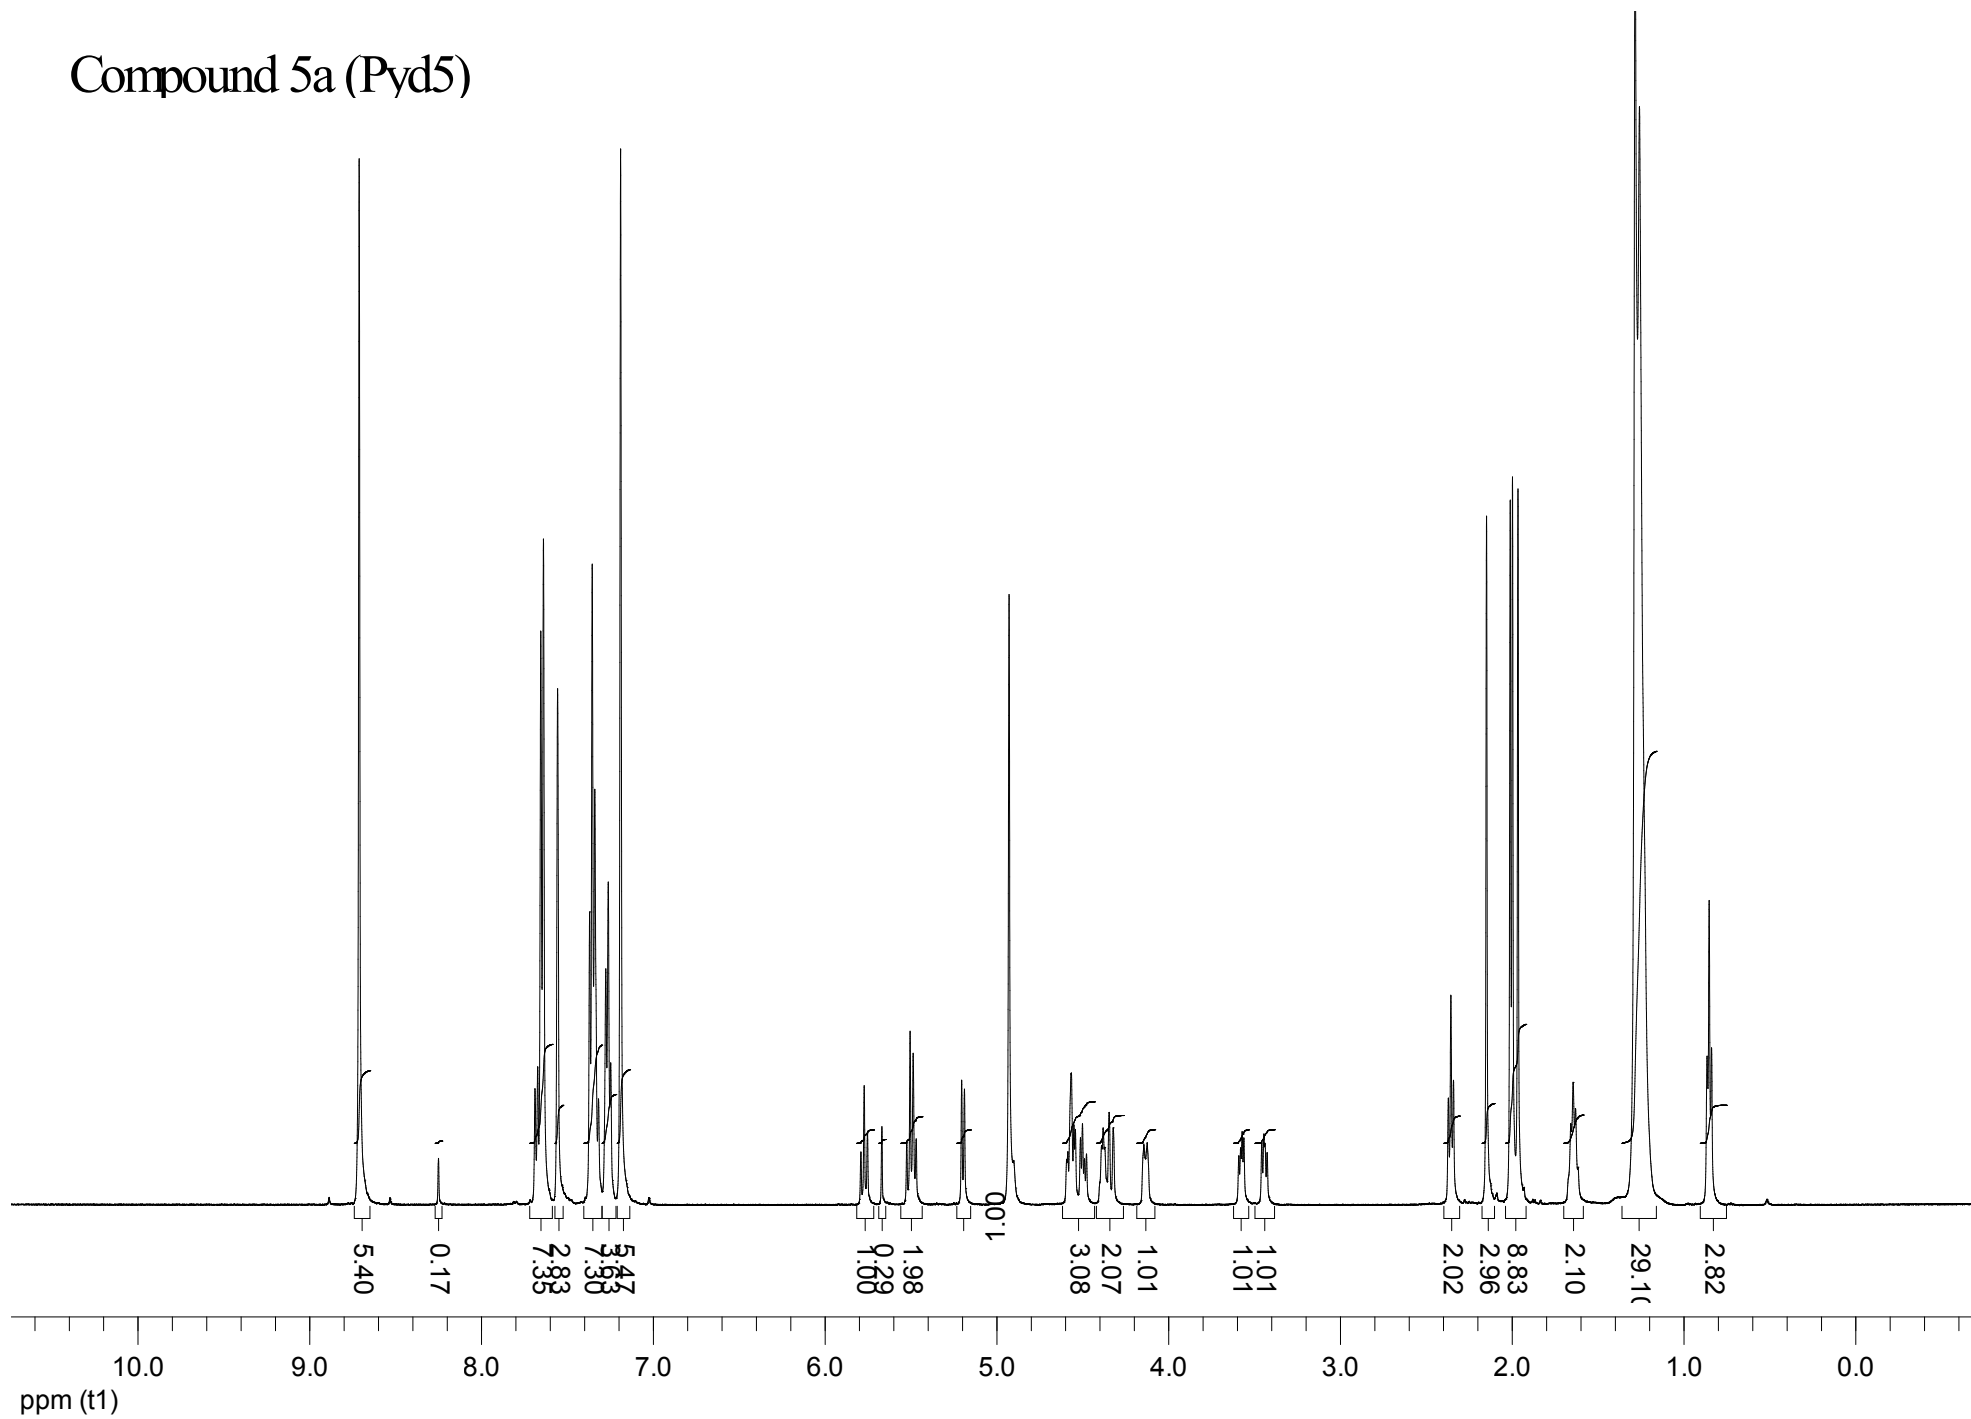

# Compound 5a (Pyd5)

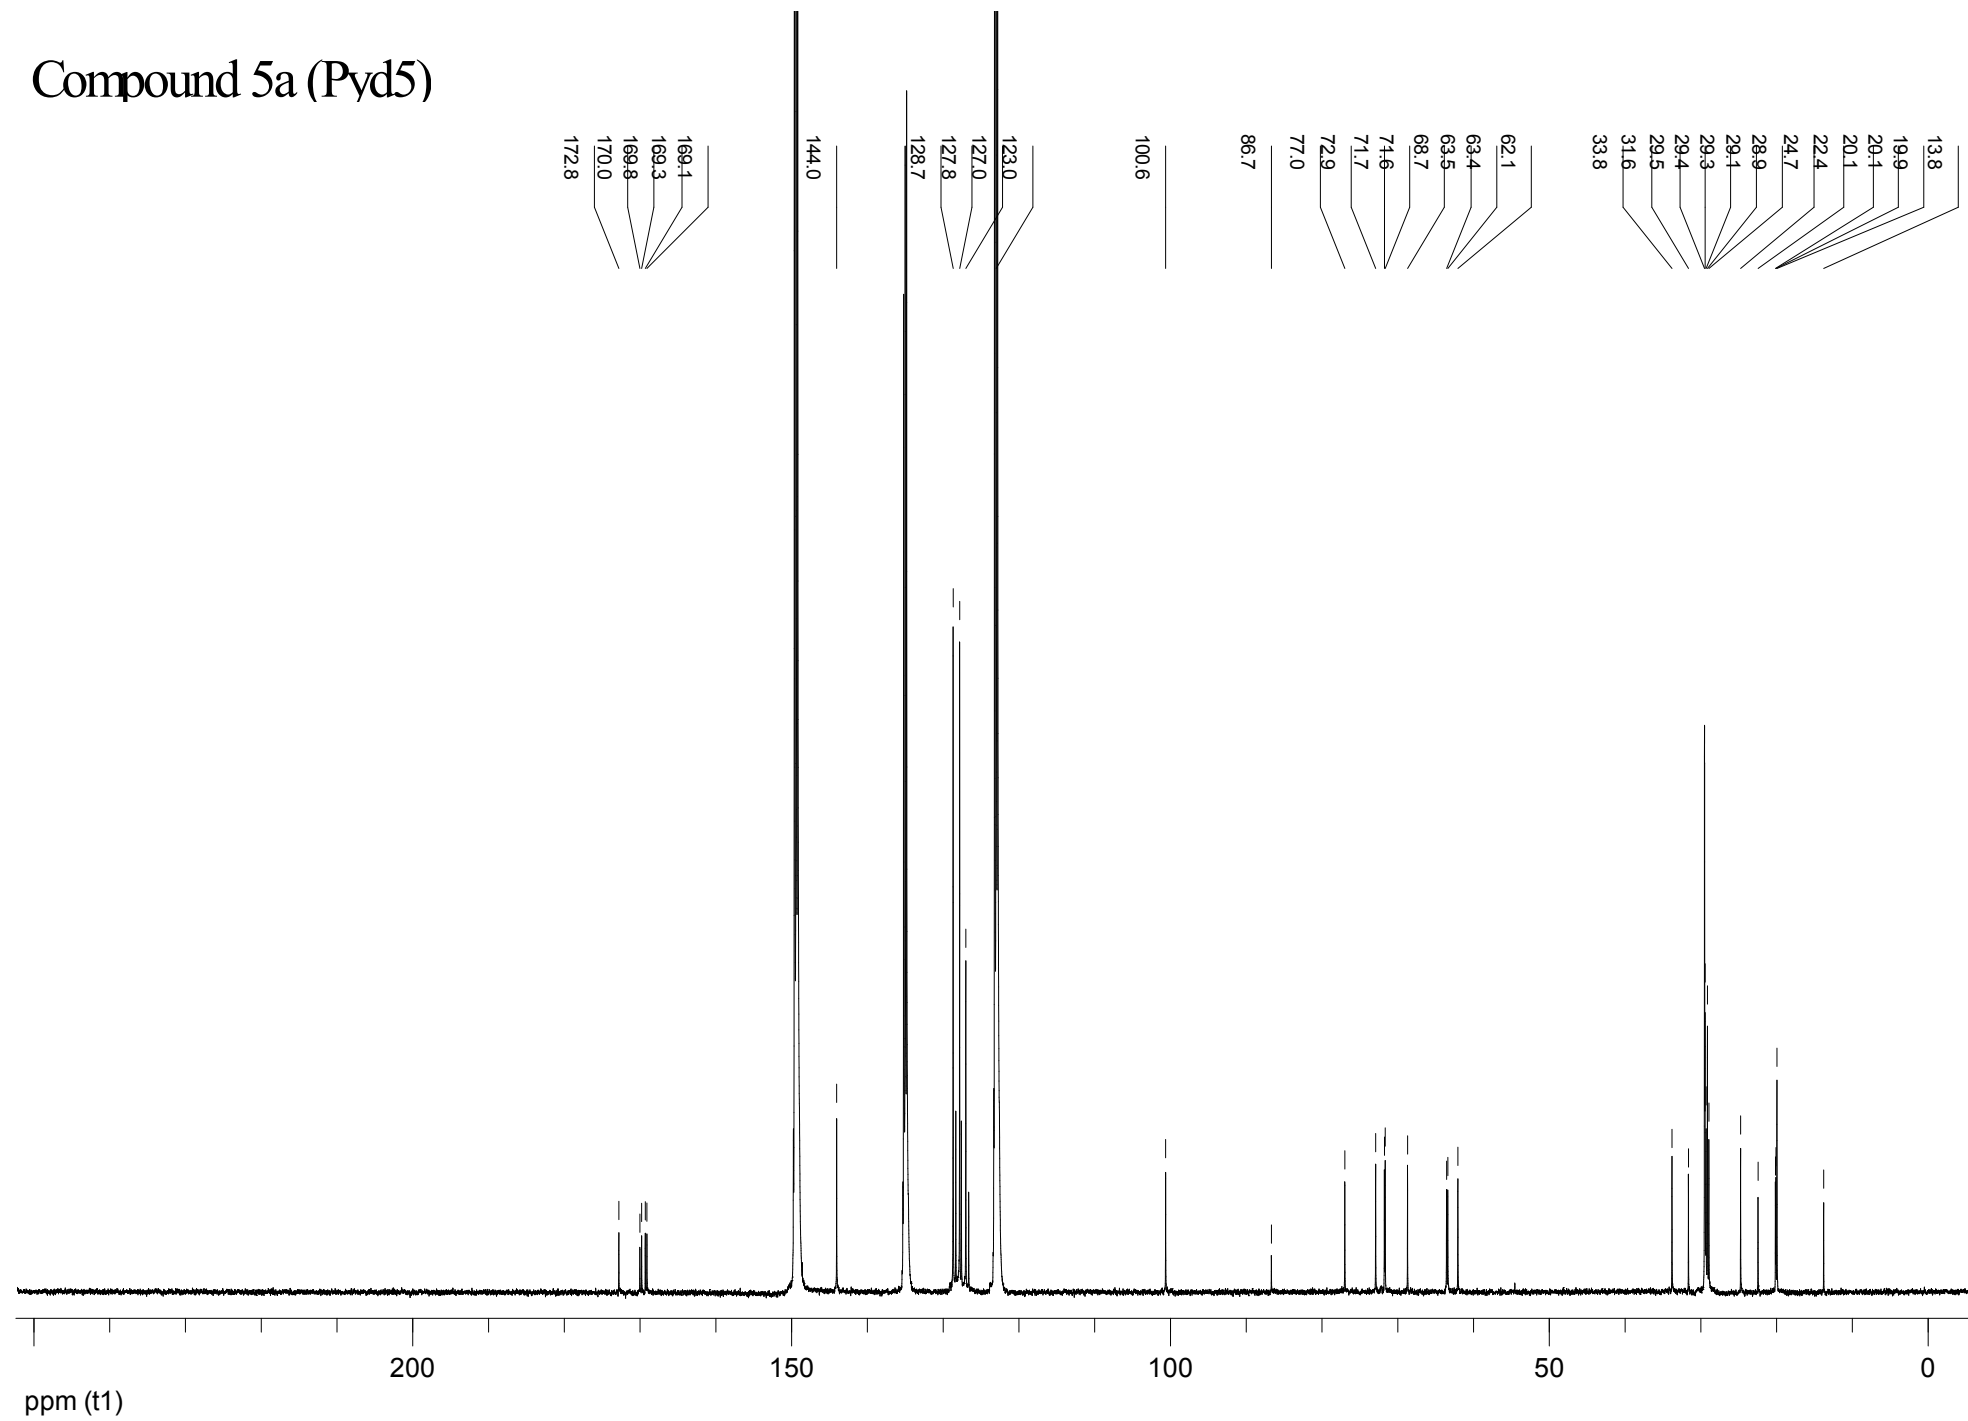

# Compound 5b (Pvd5)

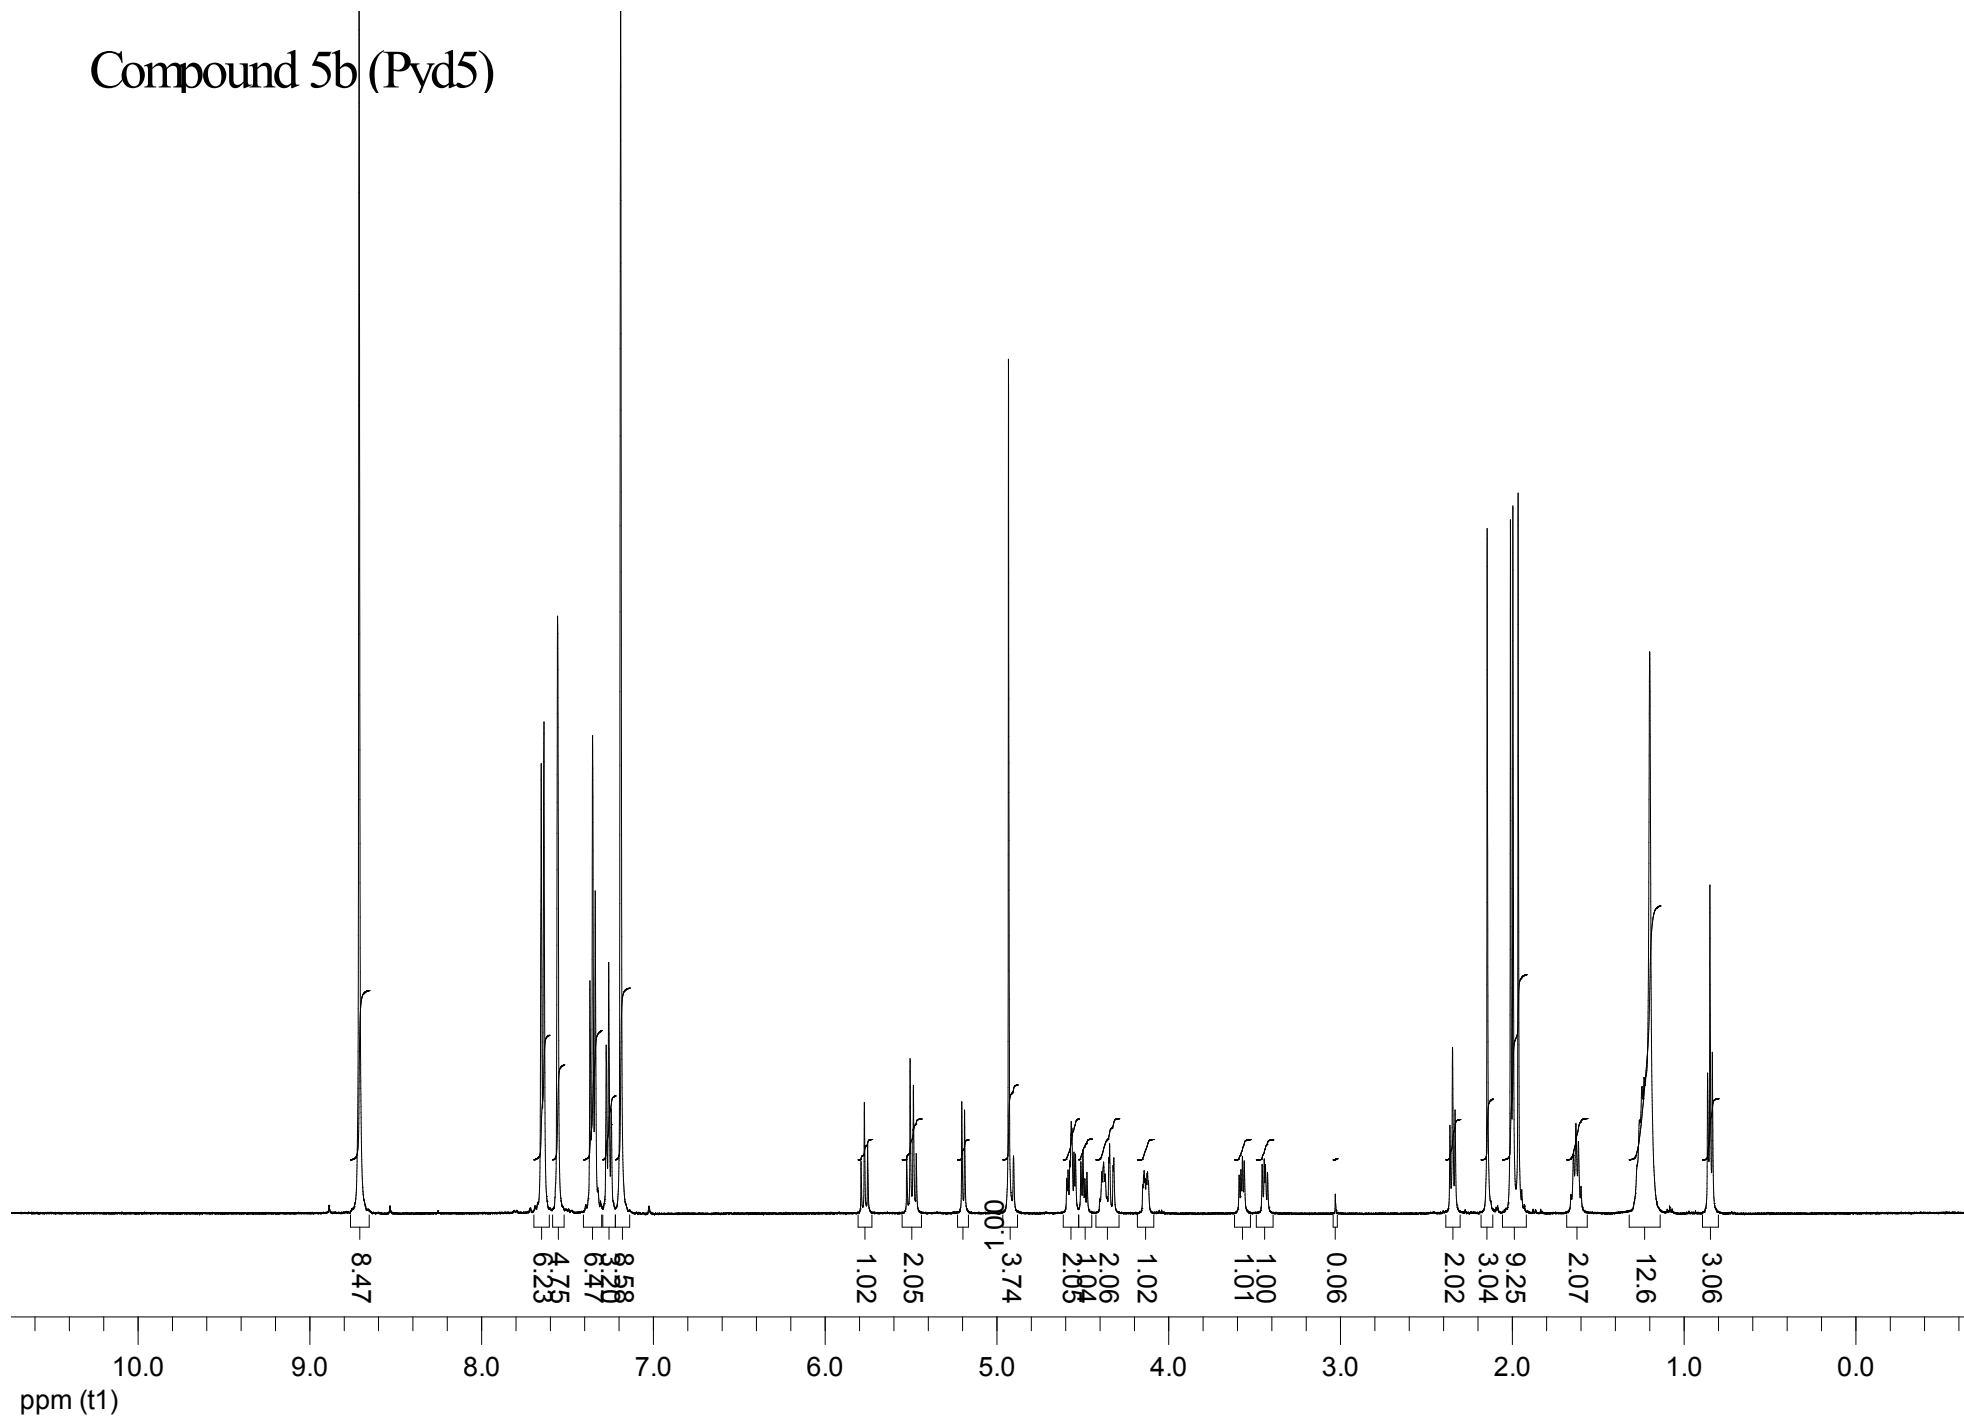

# Compound 5b (Pvd5)

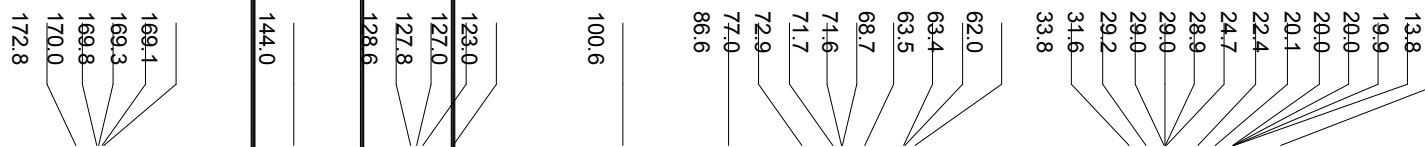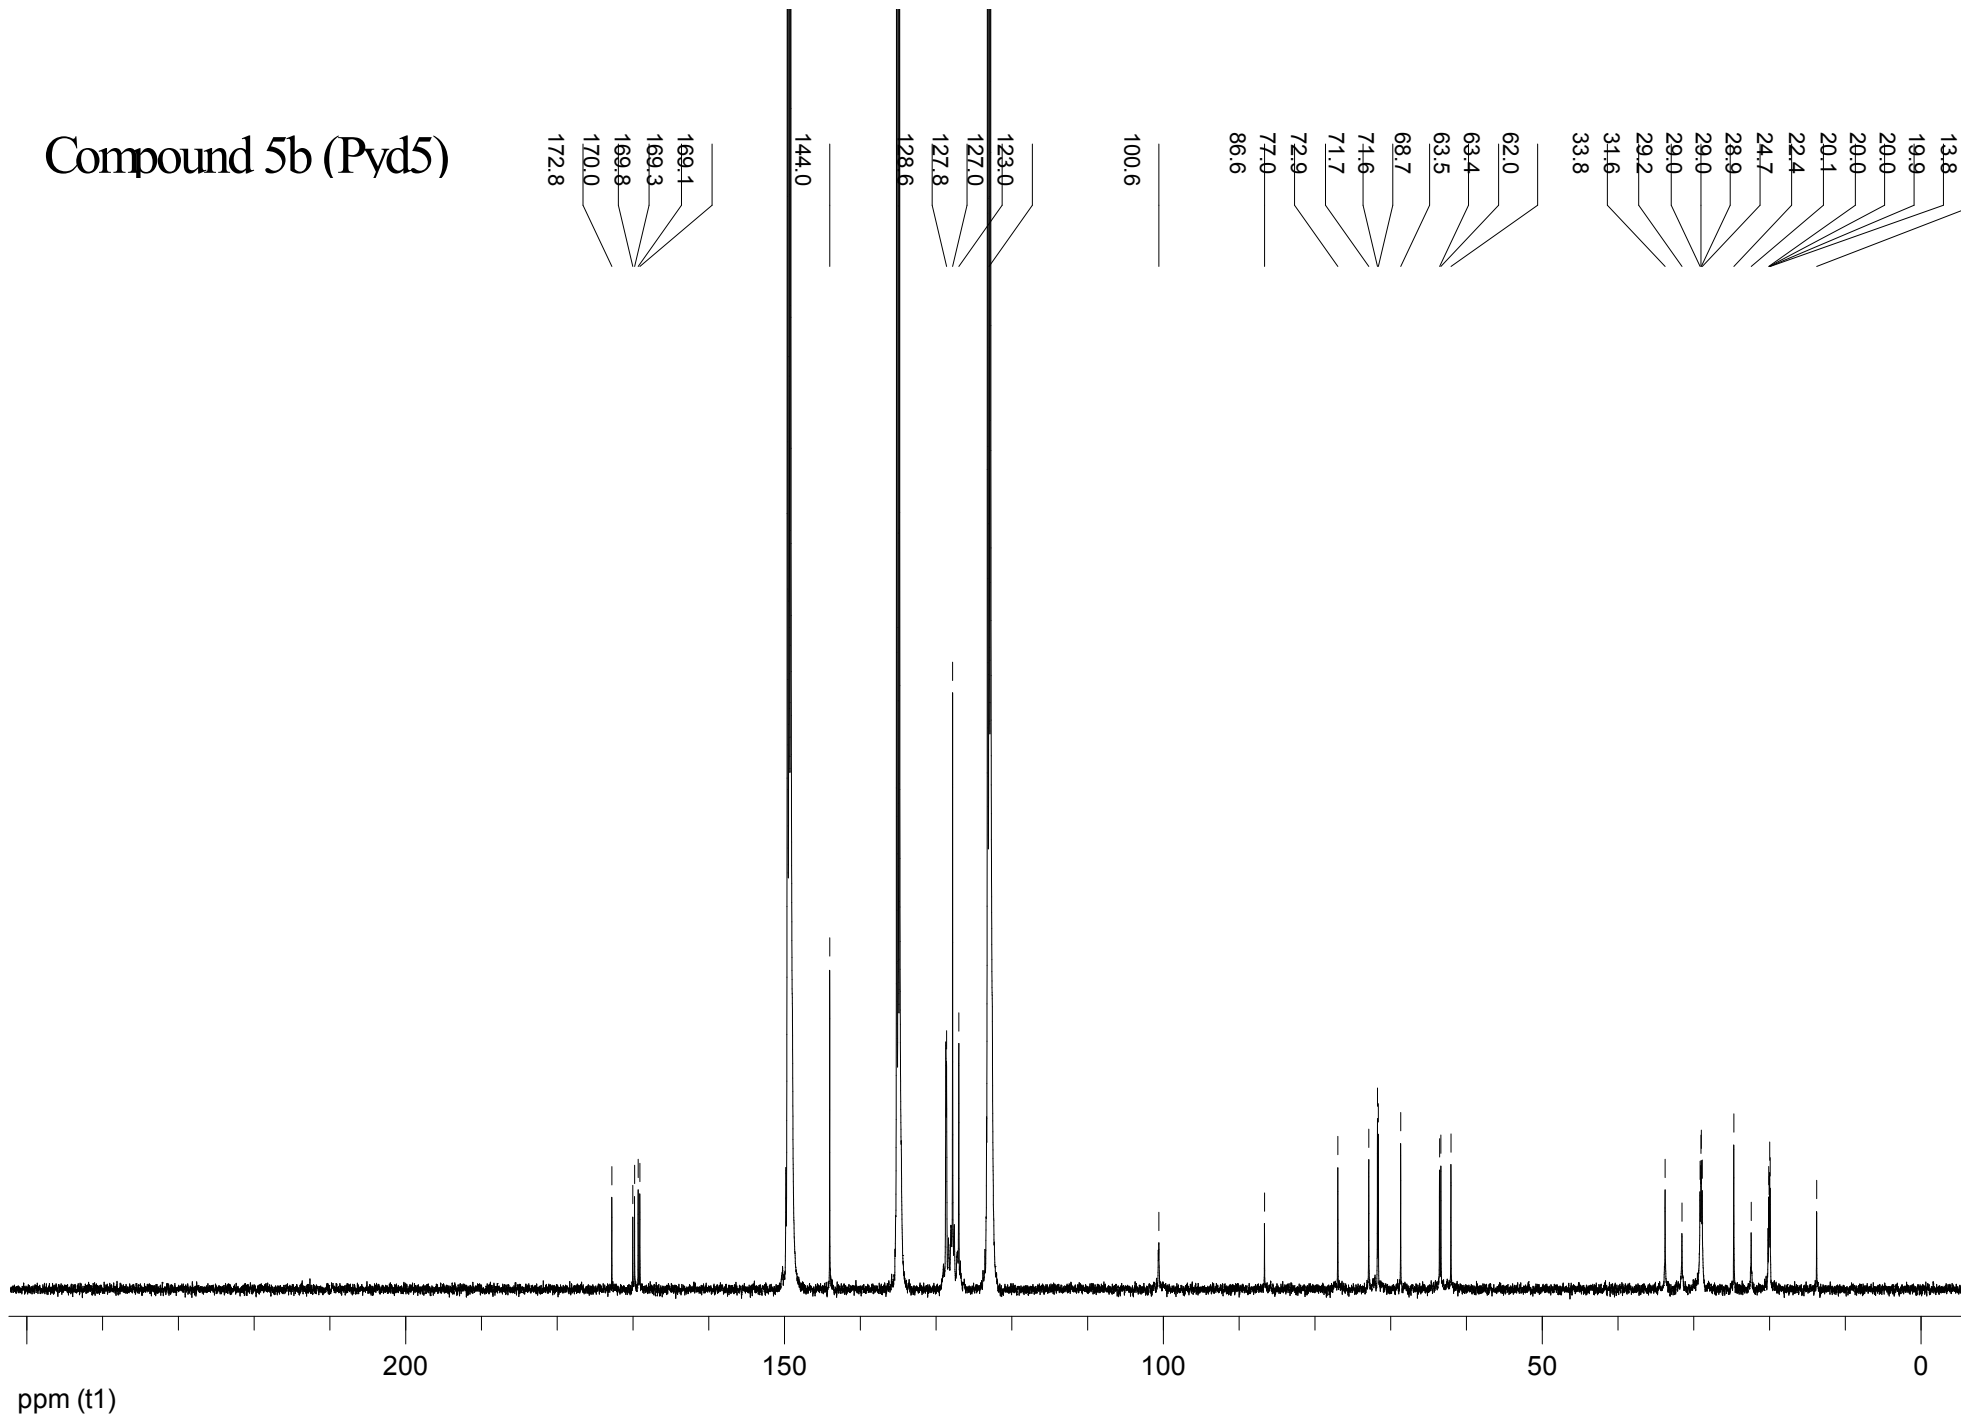

# Compound 6a (Pvd5)

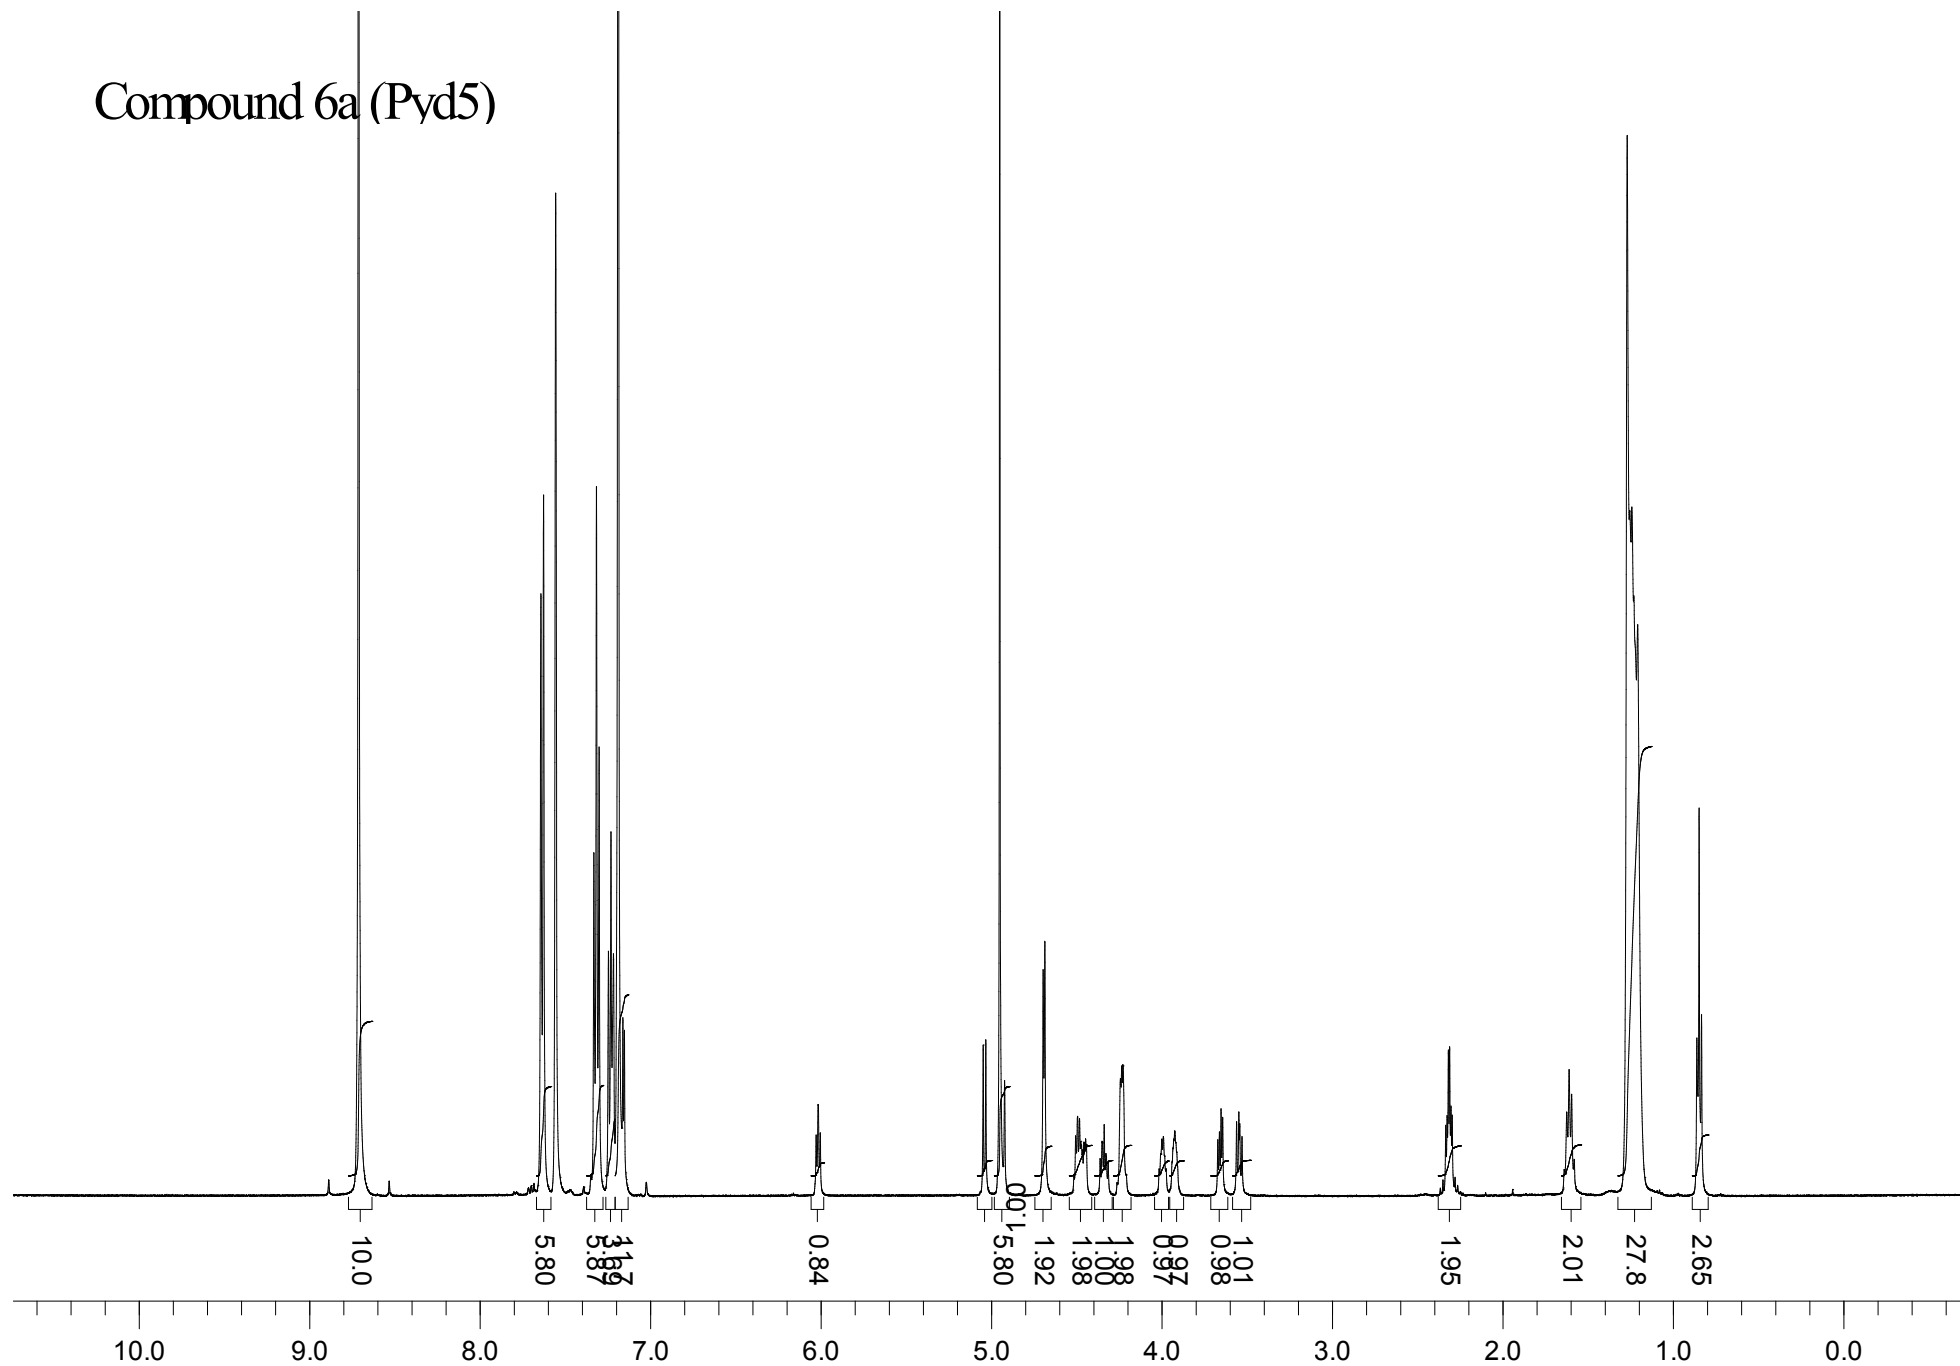

# Compound 6a (Pyd5)

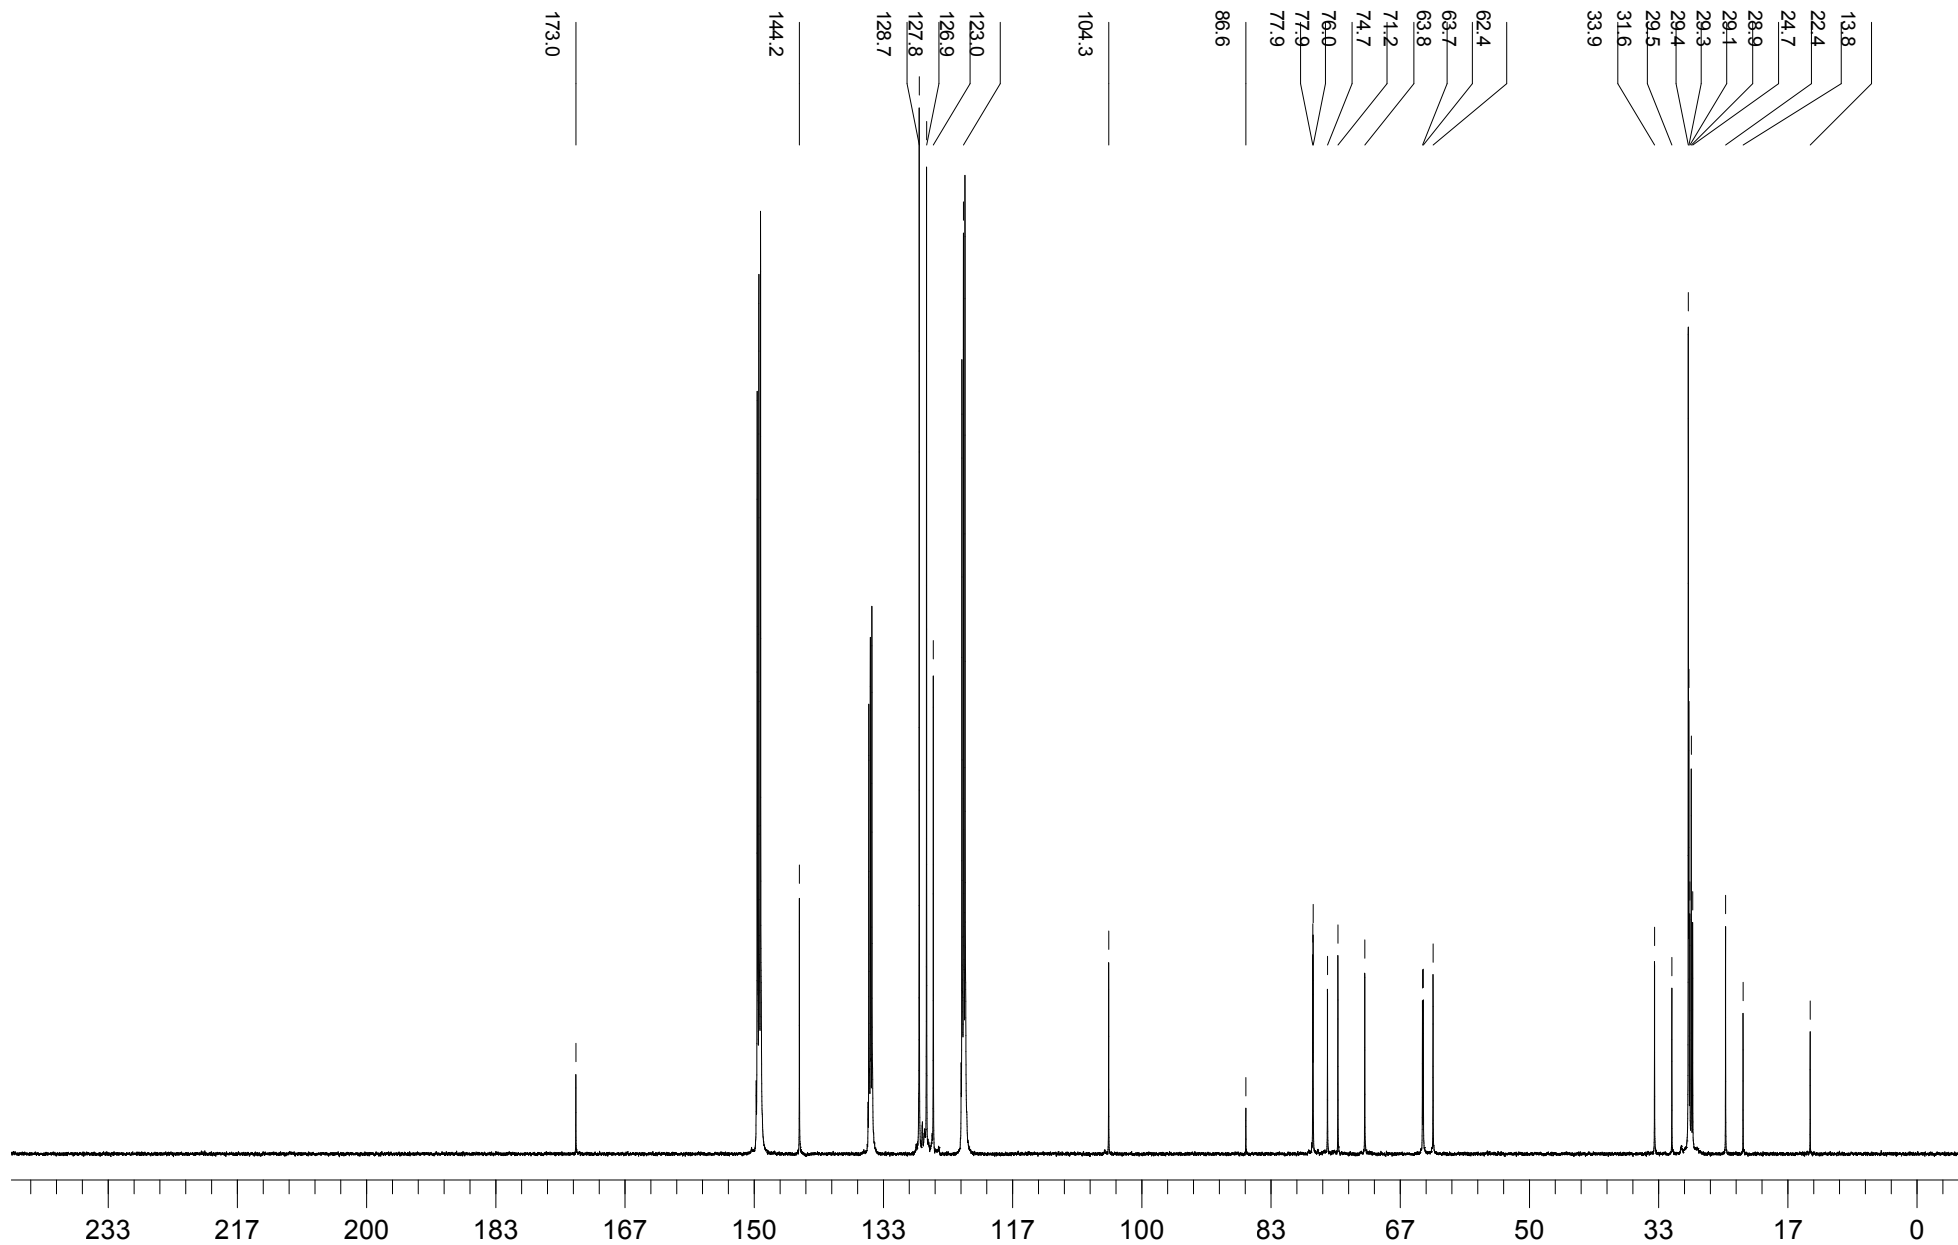

# Compound 6b (Pyd5)

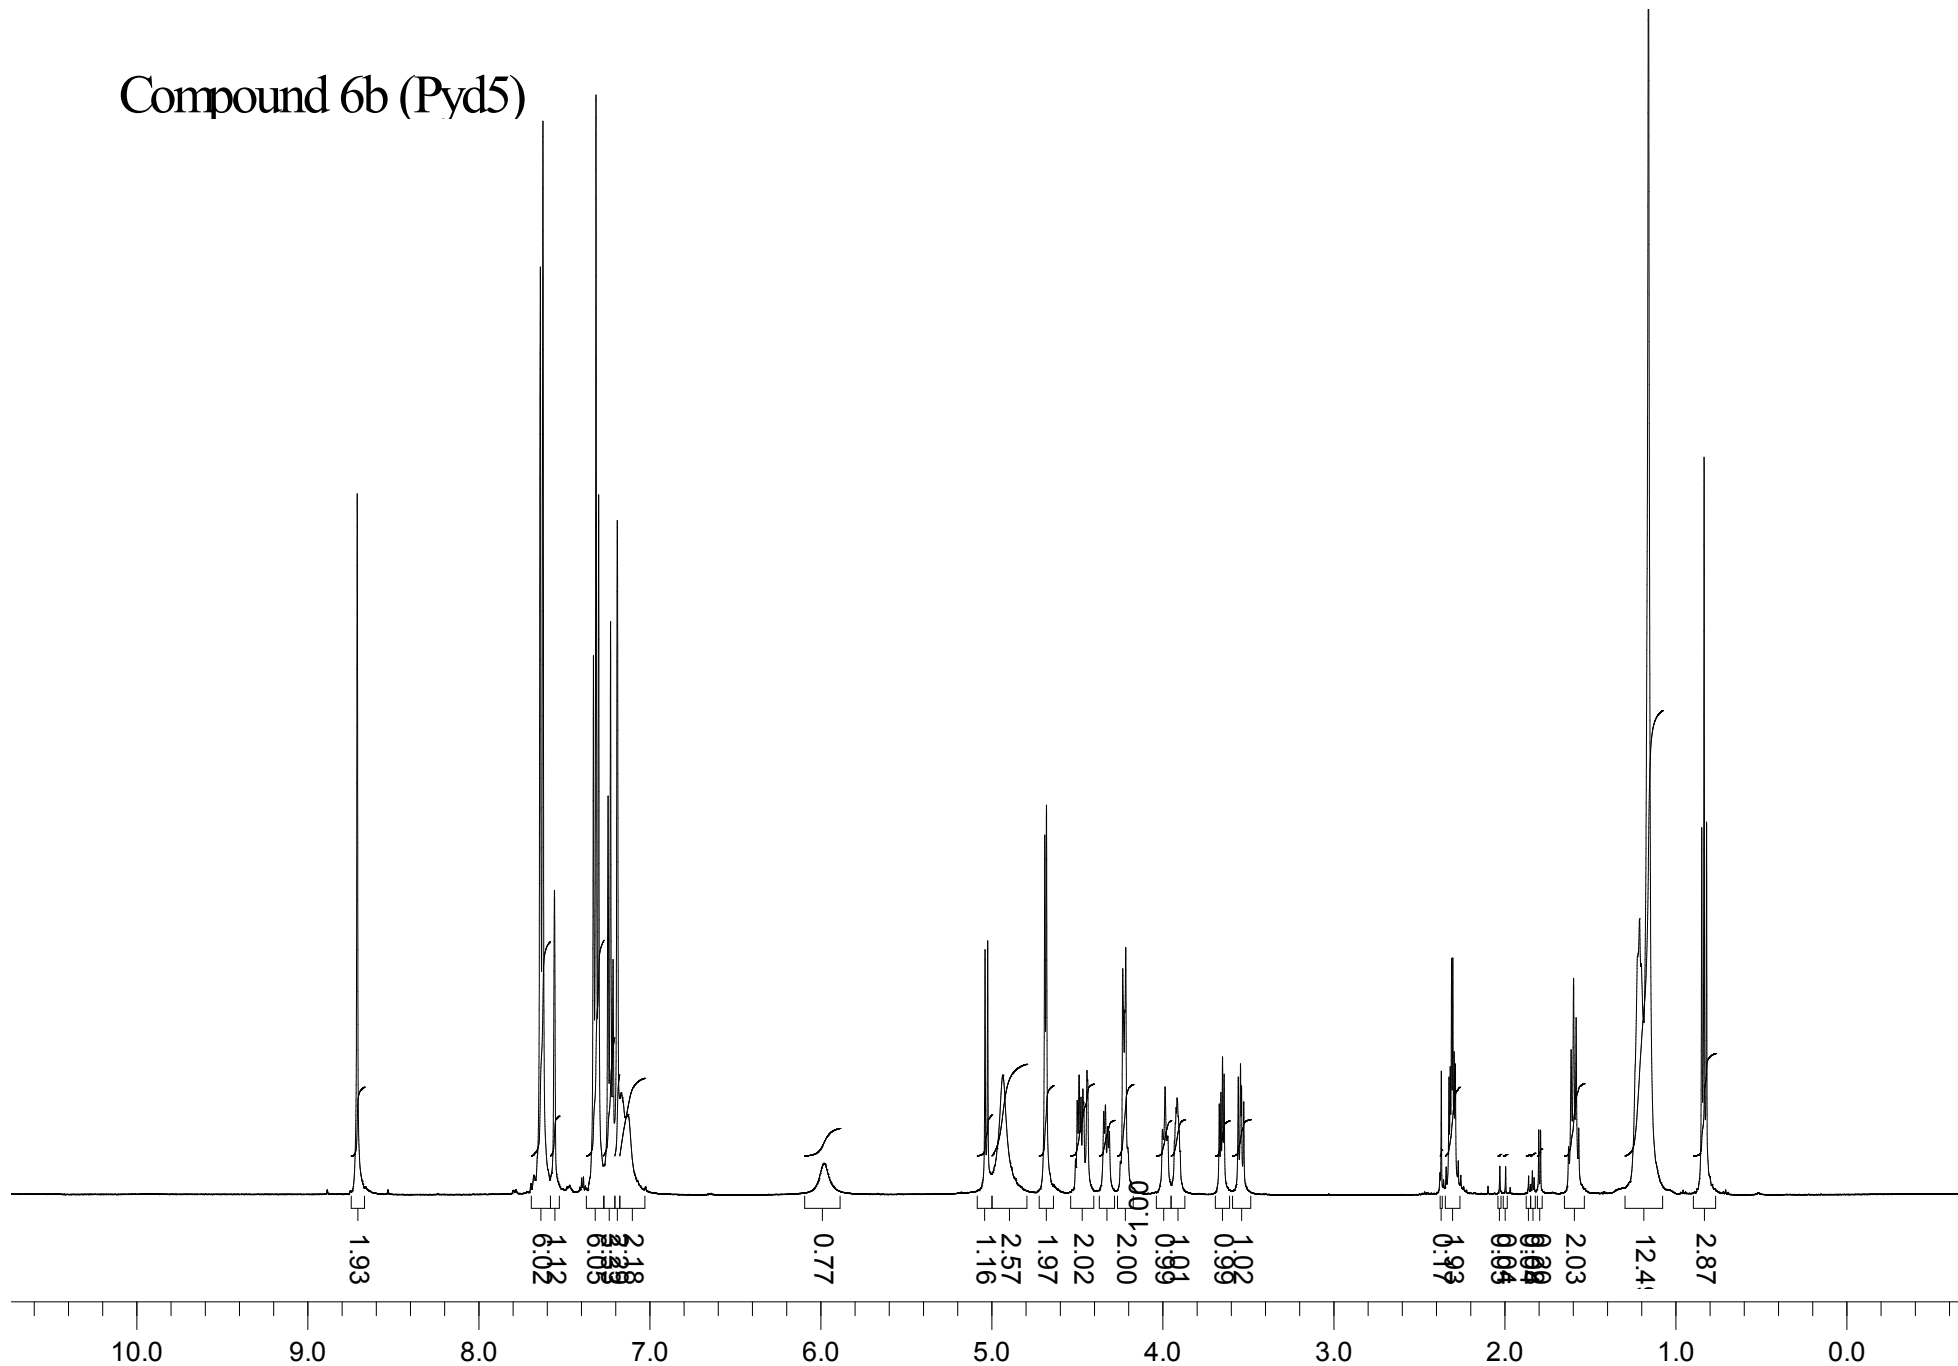



# Compound 6b (Pvd5)

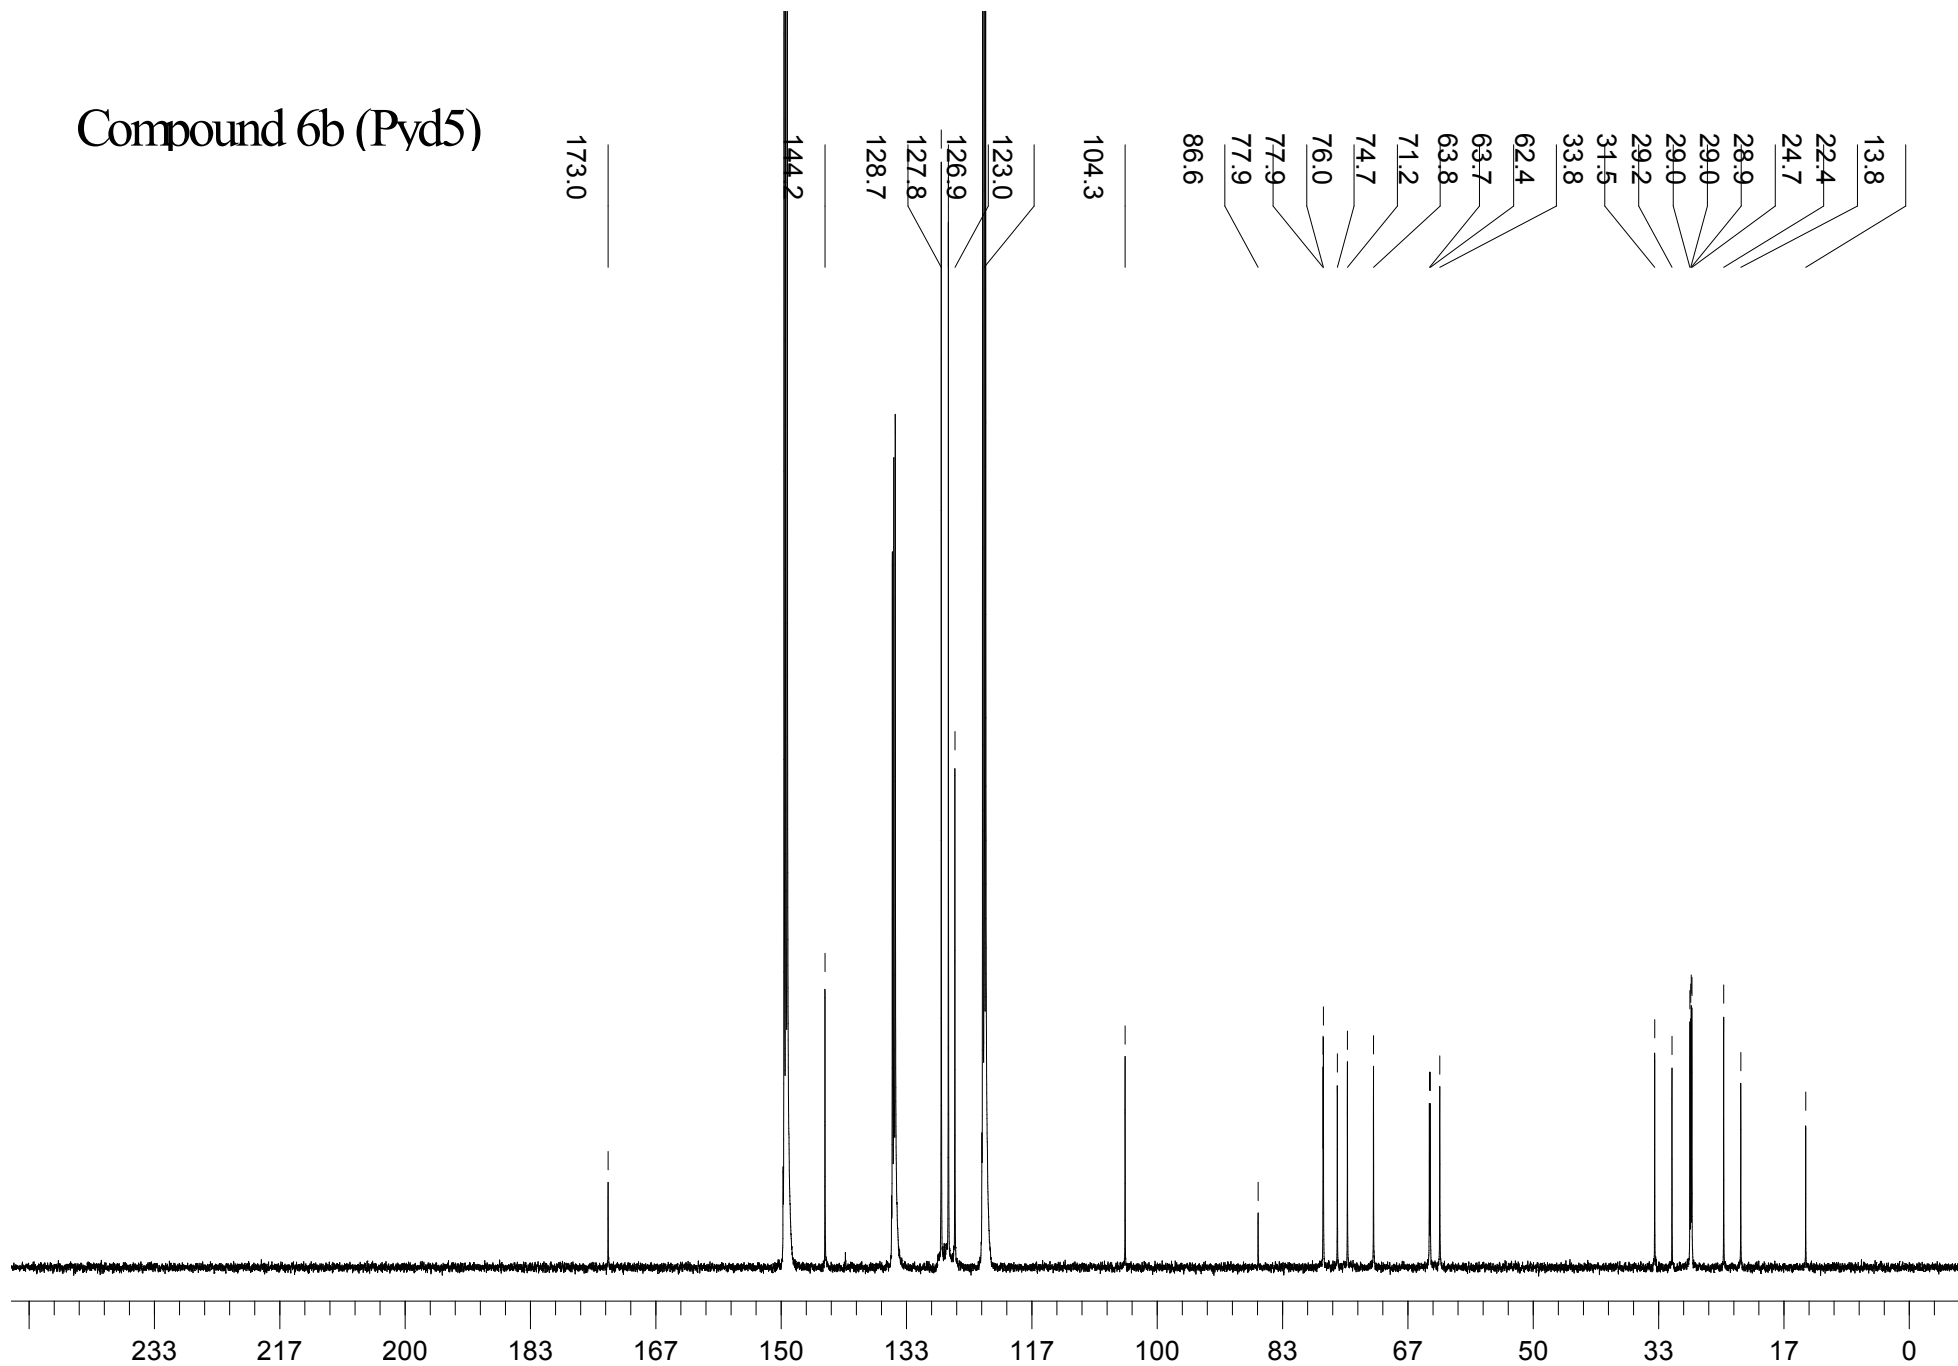

# Compound 7a (Pyd5)

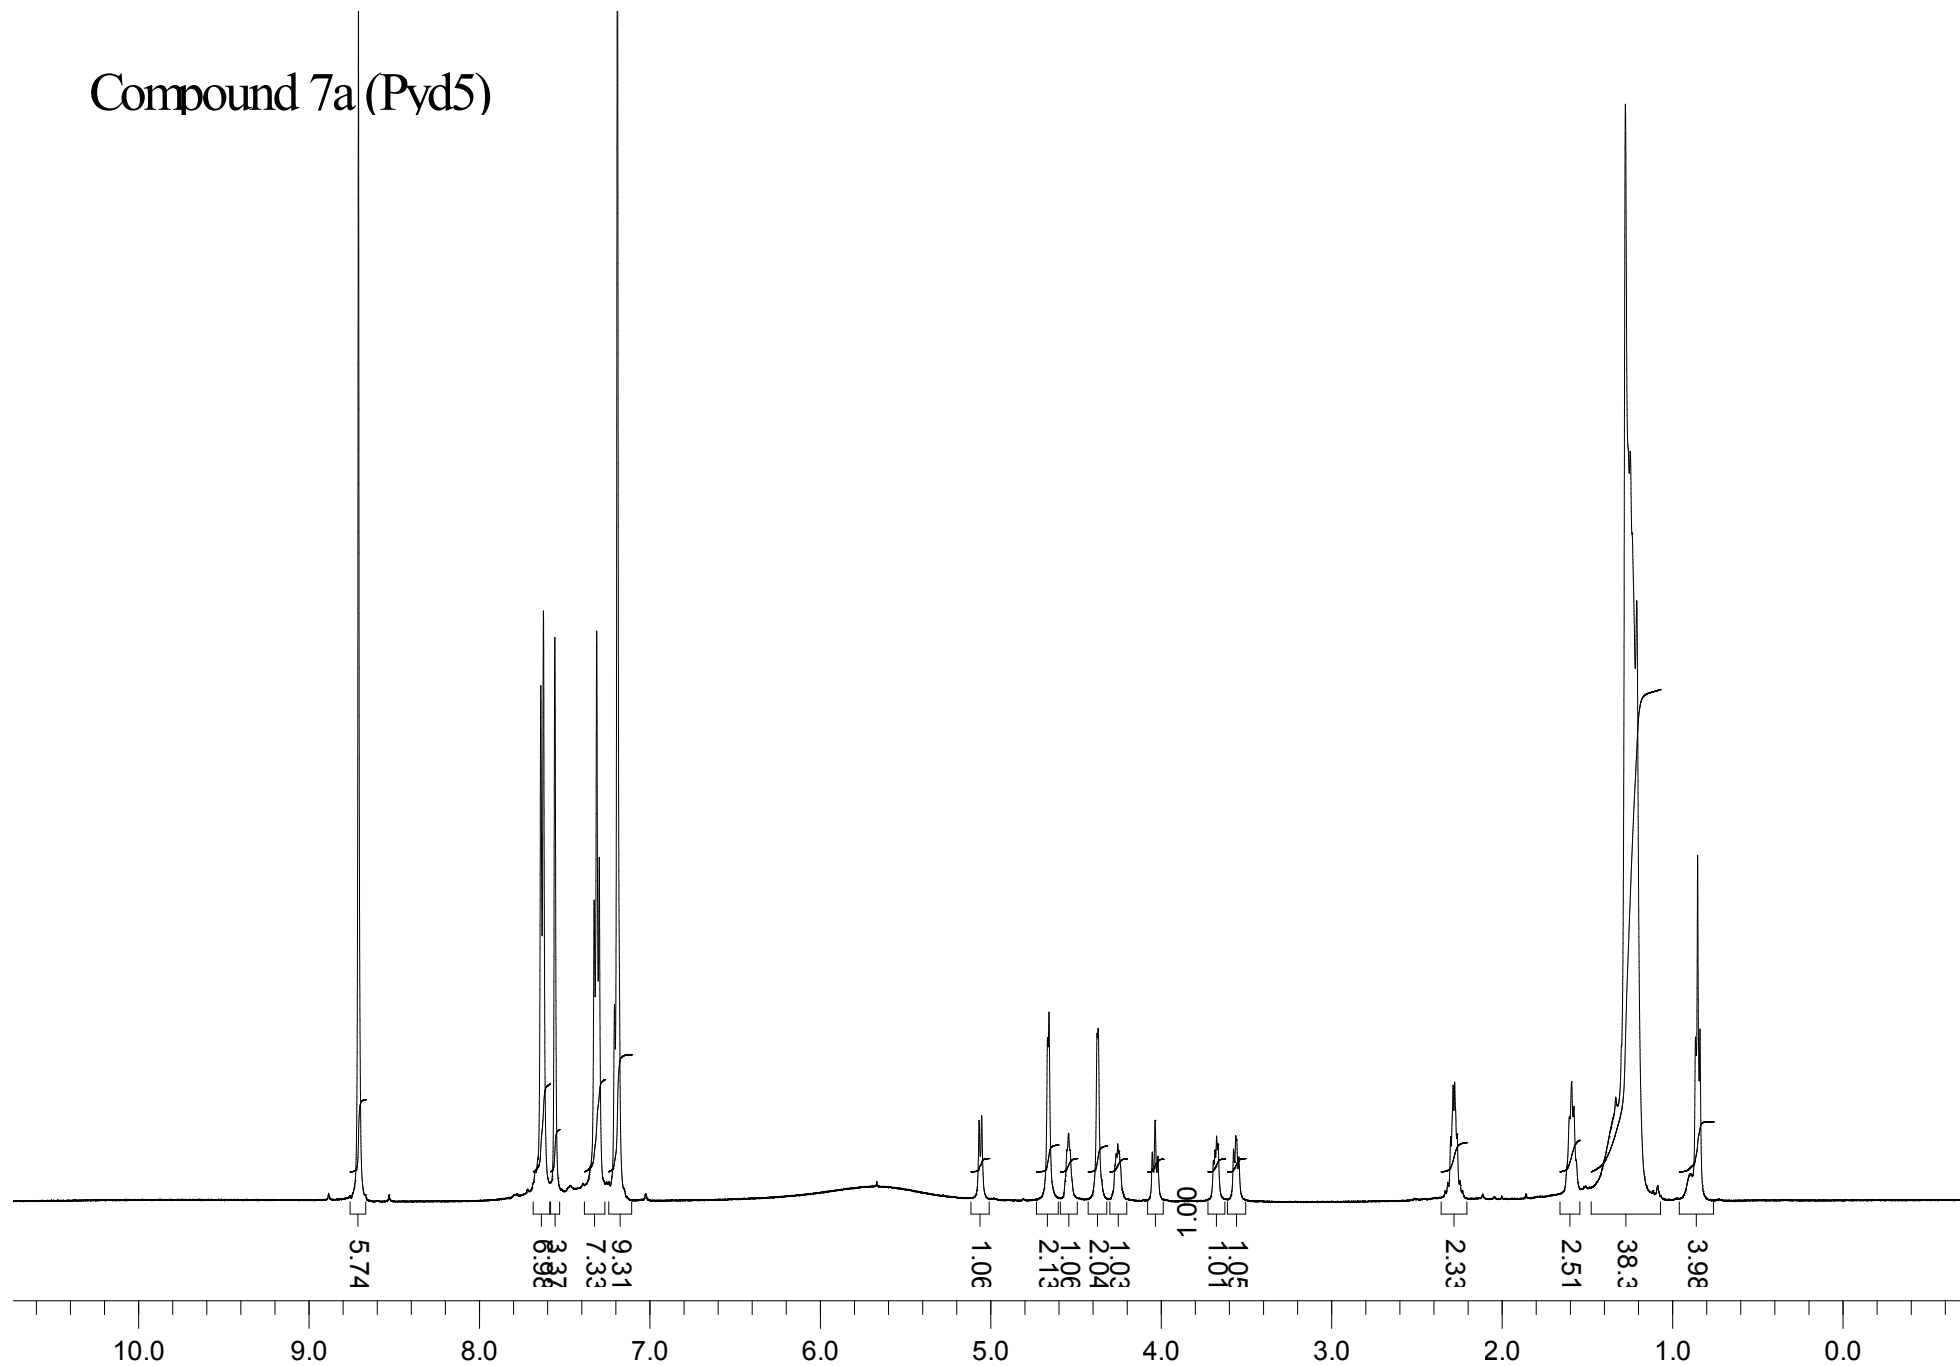

# Compound 7a (Pyd5)

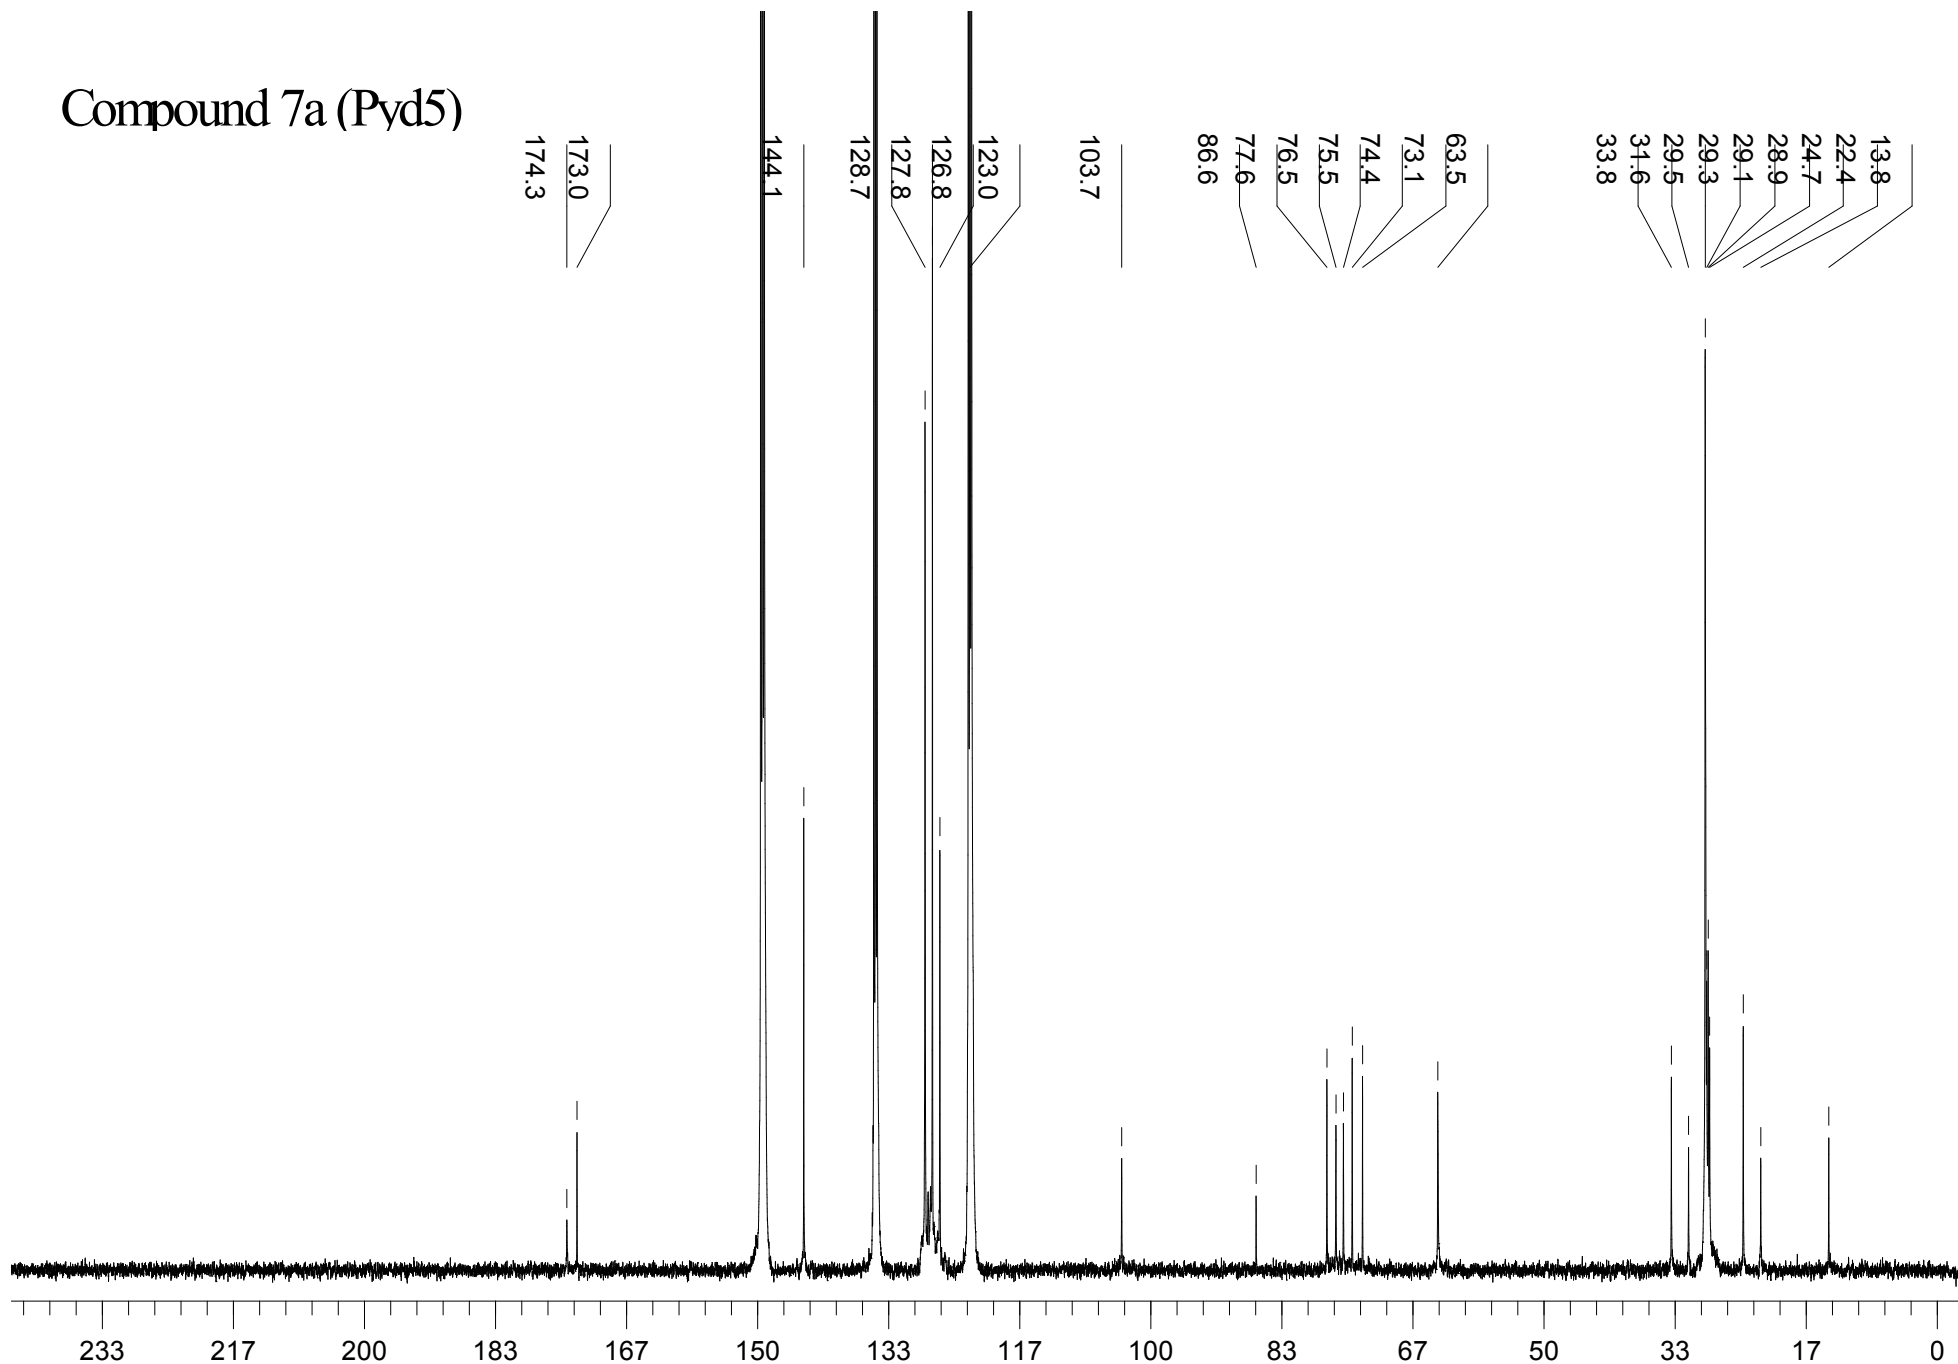

Compound 7b (Pvd5)

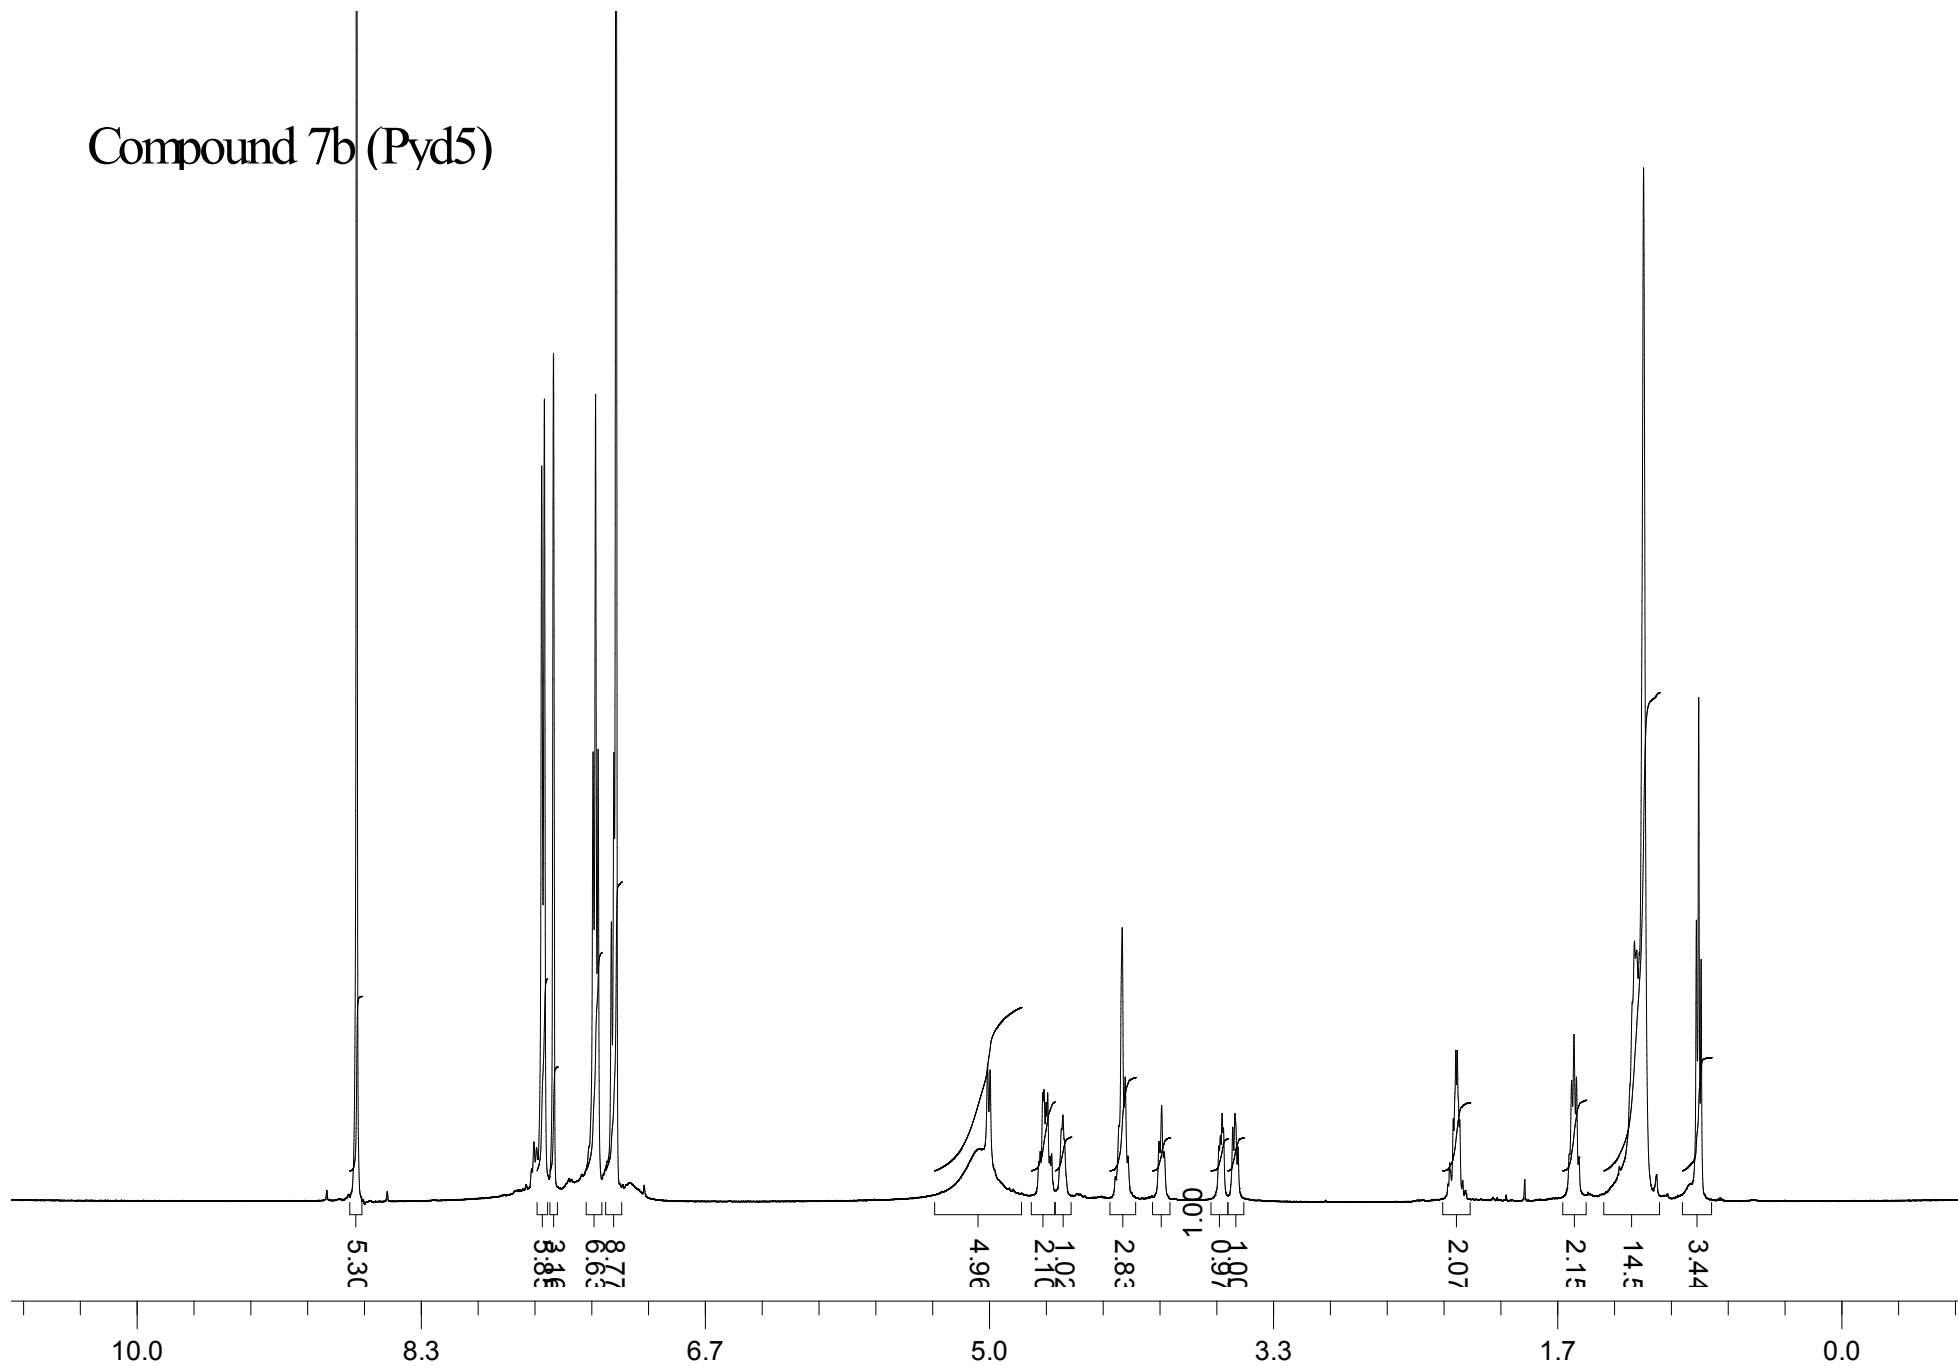

# Compound 7b (Pvd5)

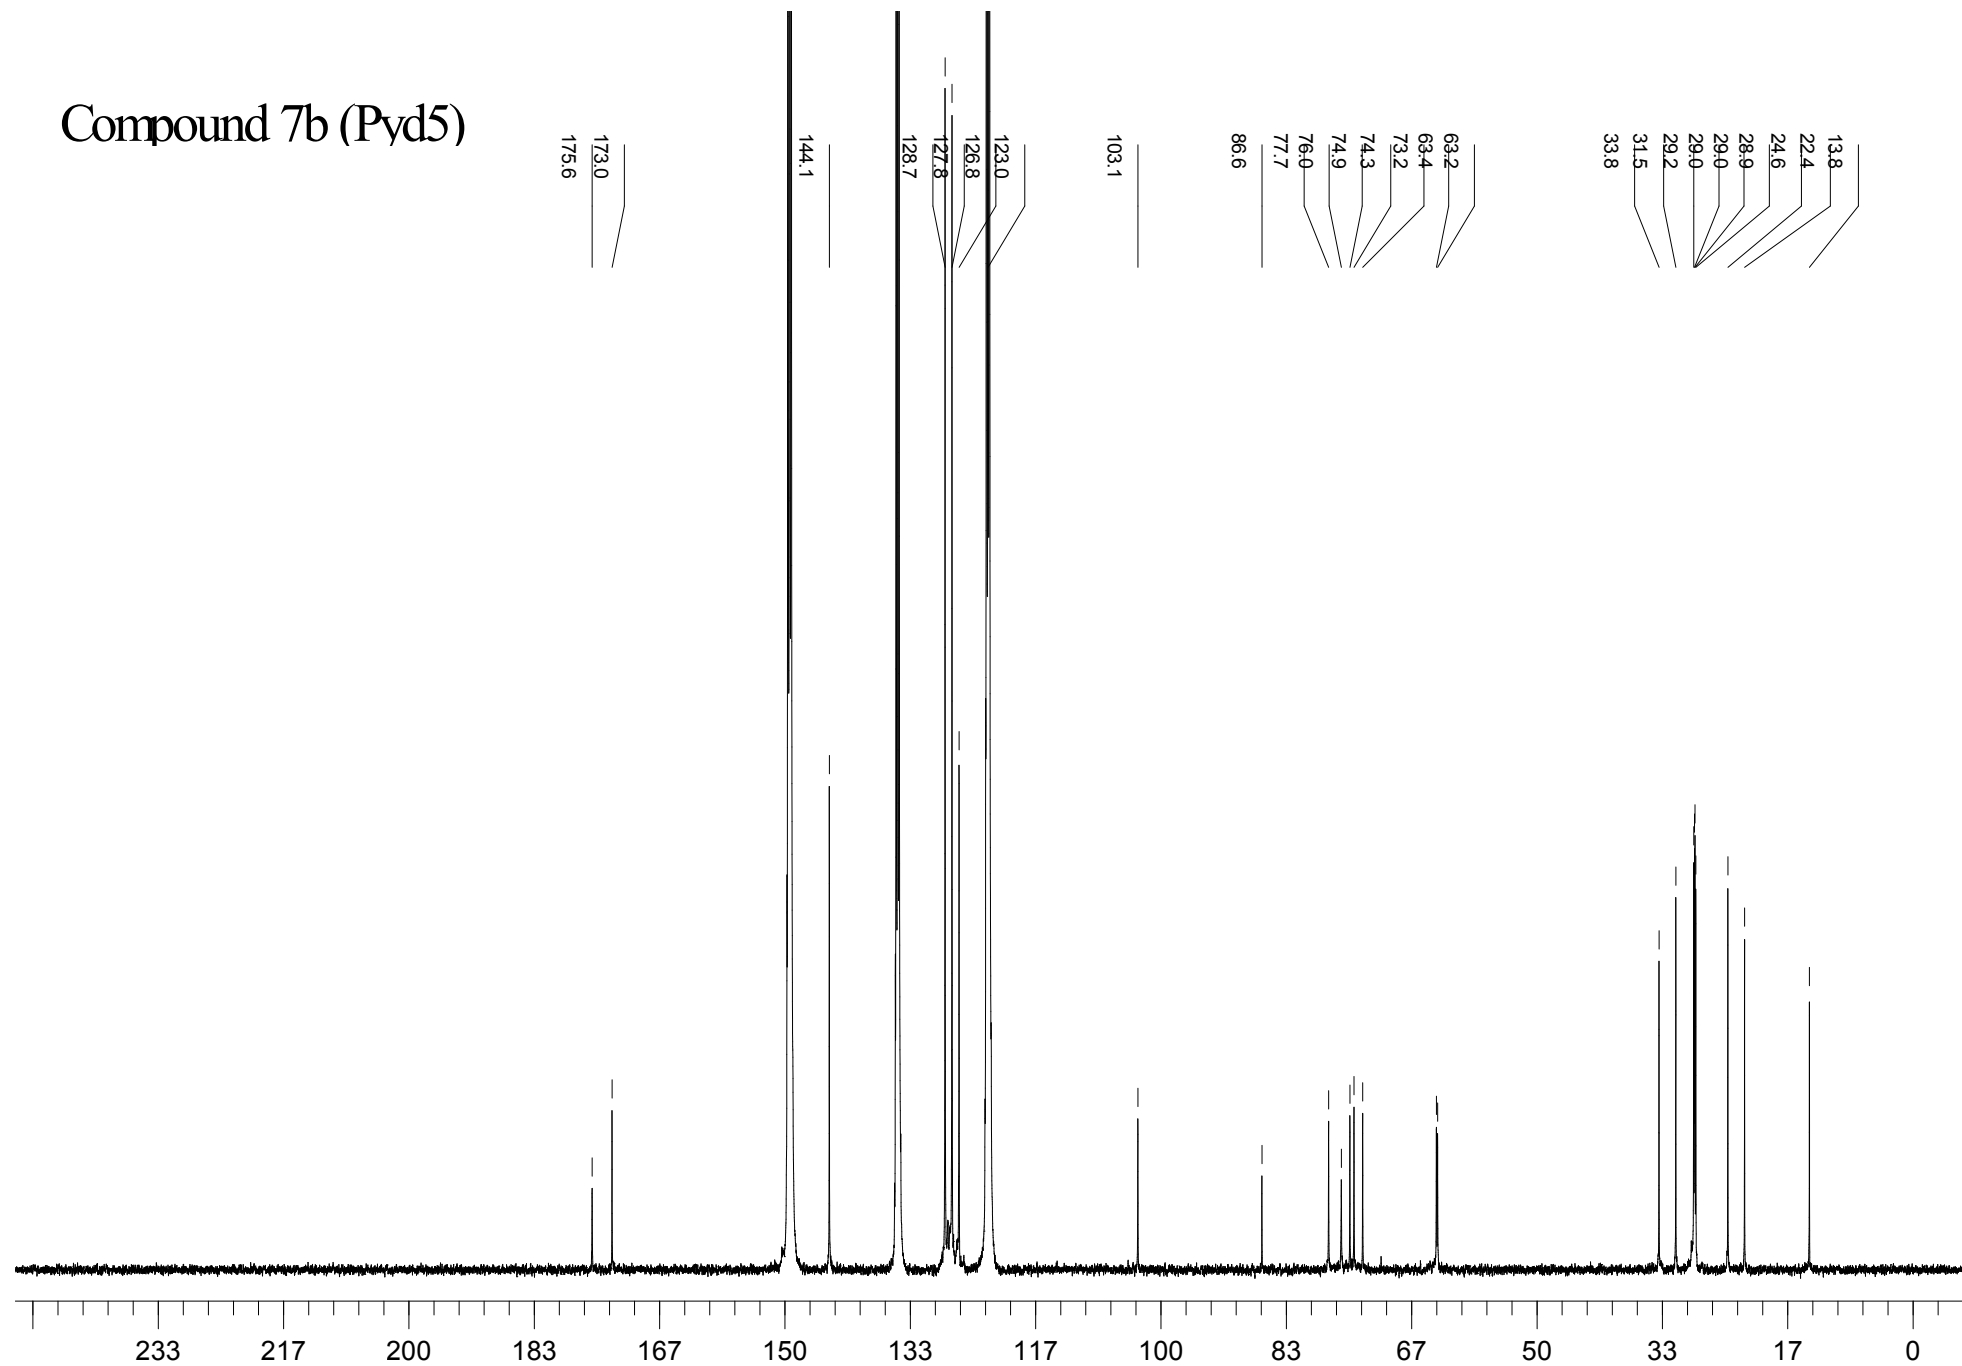

Compound 8b (CDCl<sub>3</sub>)

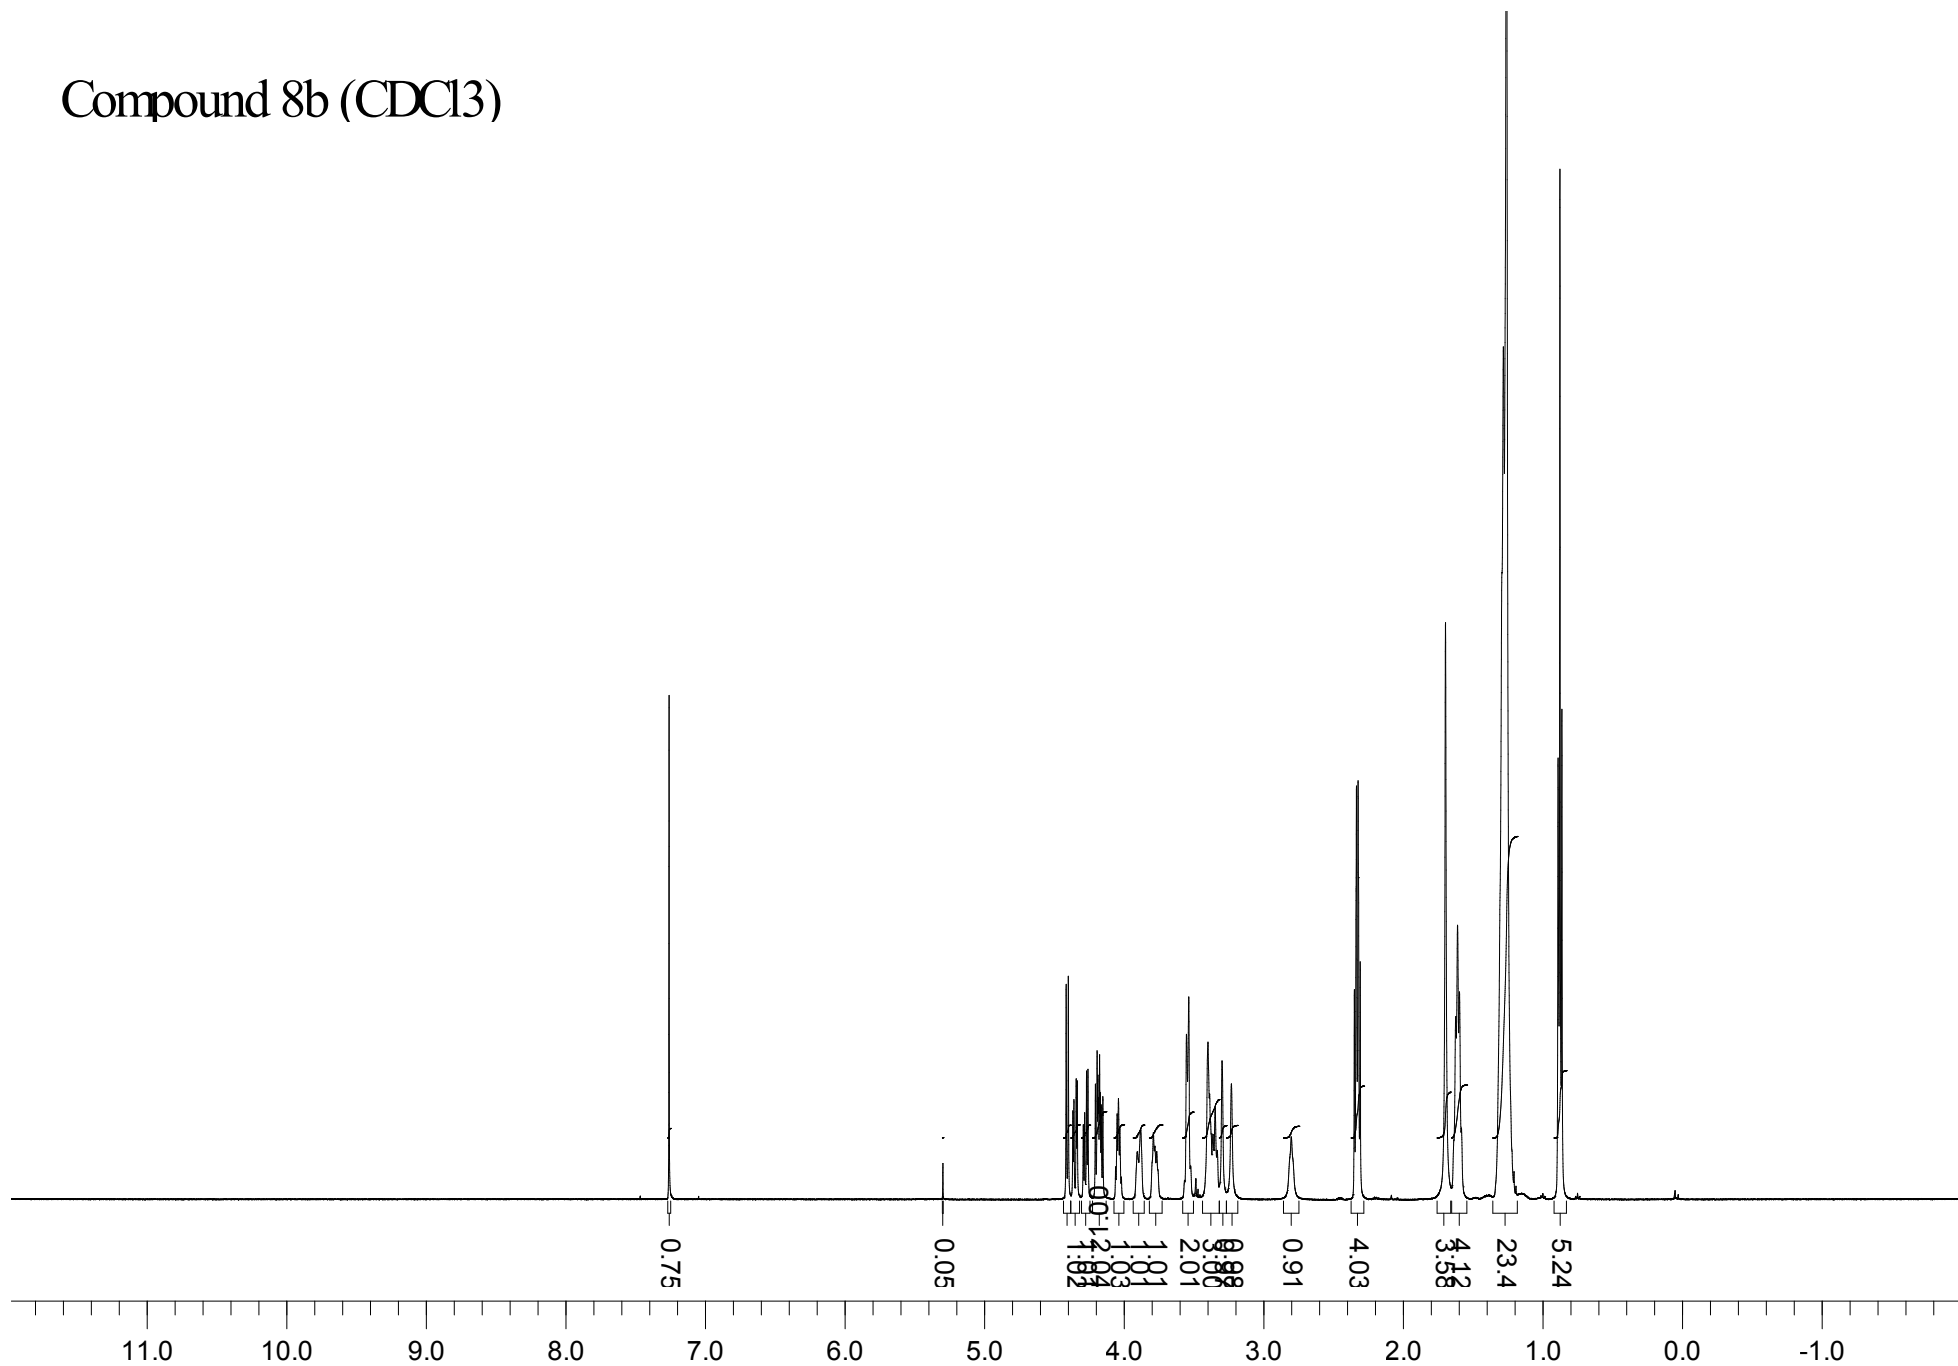

Compound 8b (CDCl<sub>3</sub>)

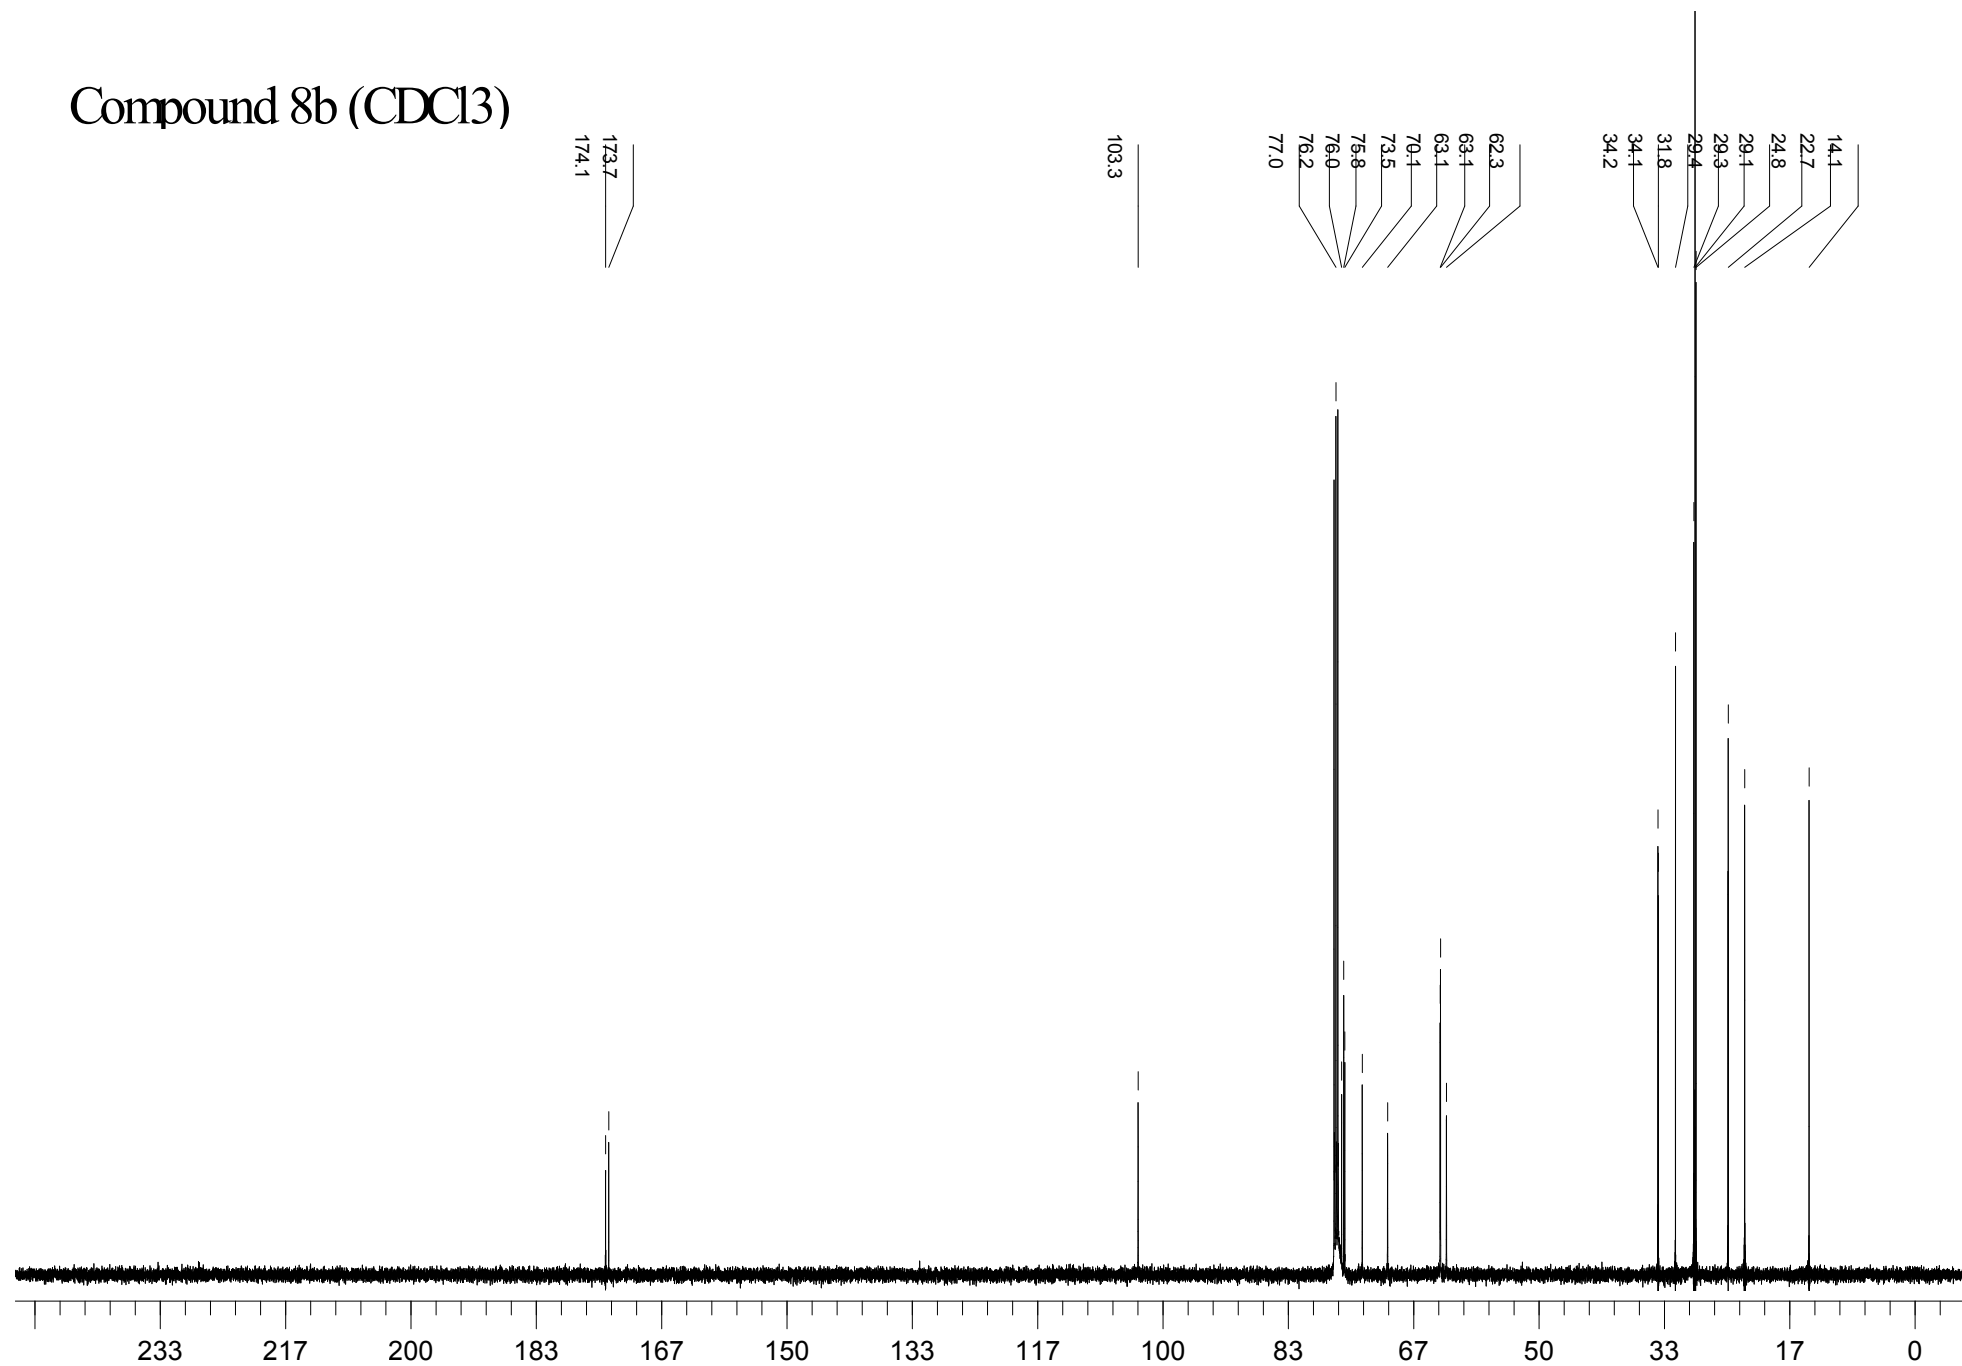

1,3-di-O-decanoyl-2-O-(2',3',4',6'-tetra-O-chloroacetyl- $\beta$ -D-glucopyranosyl)-sn-glycerol (CDCl<sub>3</sub>)

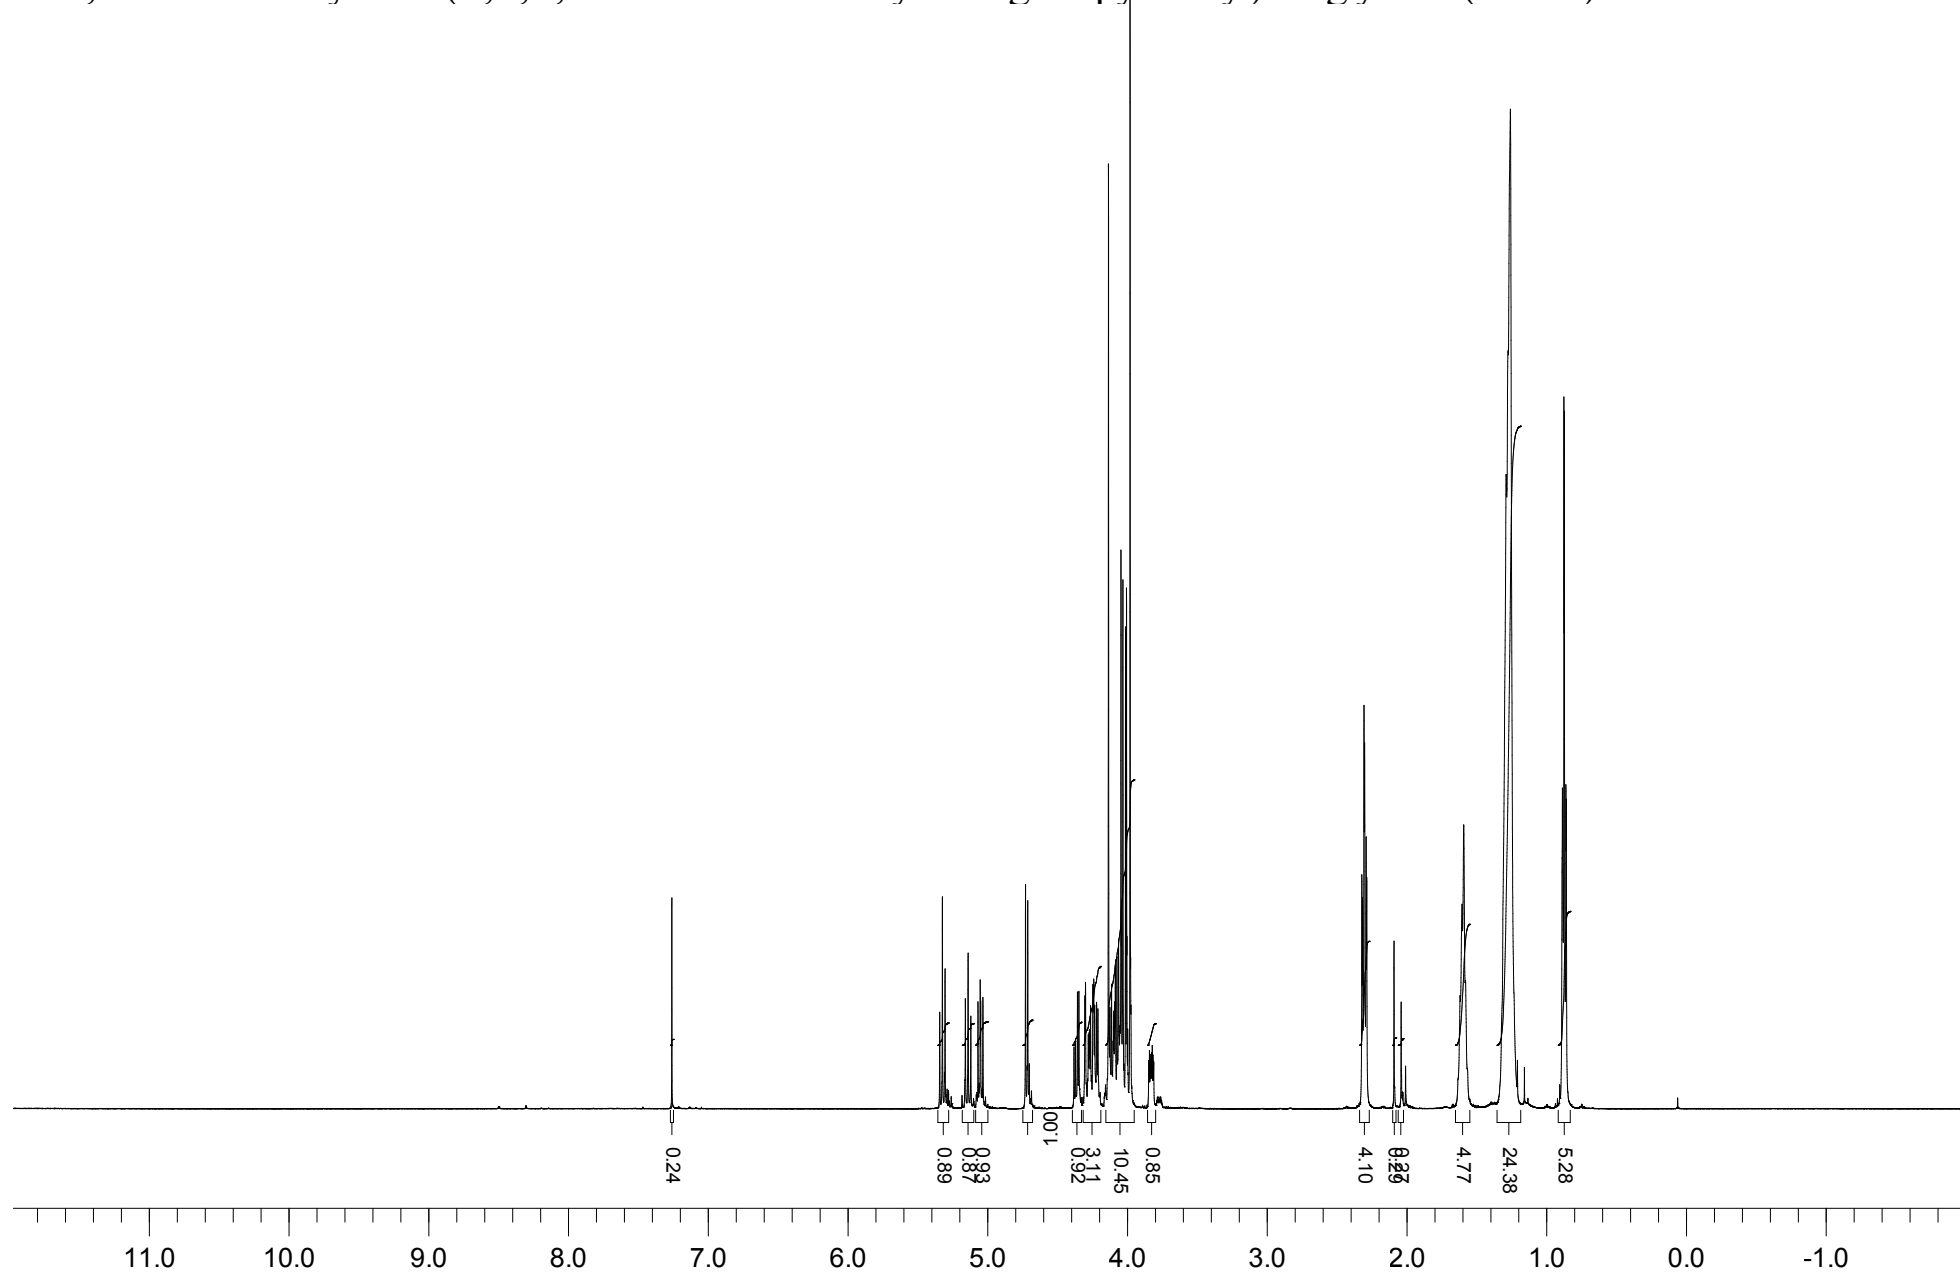



1,3-di-O-decanoyl-2-O-(2',3',4',6'-tetra-O-chloroacetyl-b-D-glucopyranosyl)-sn-glycerol (CDCl<sub>3</sub>)

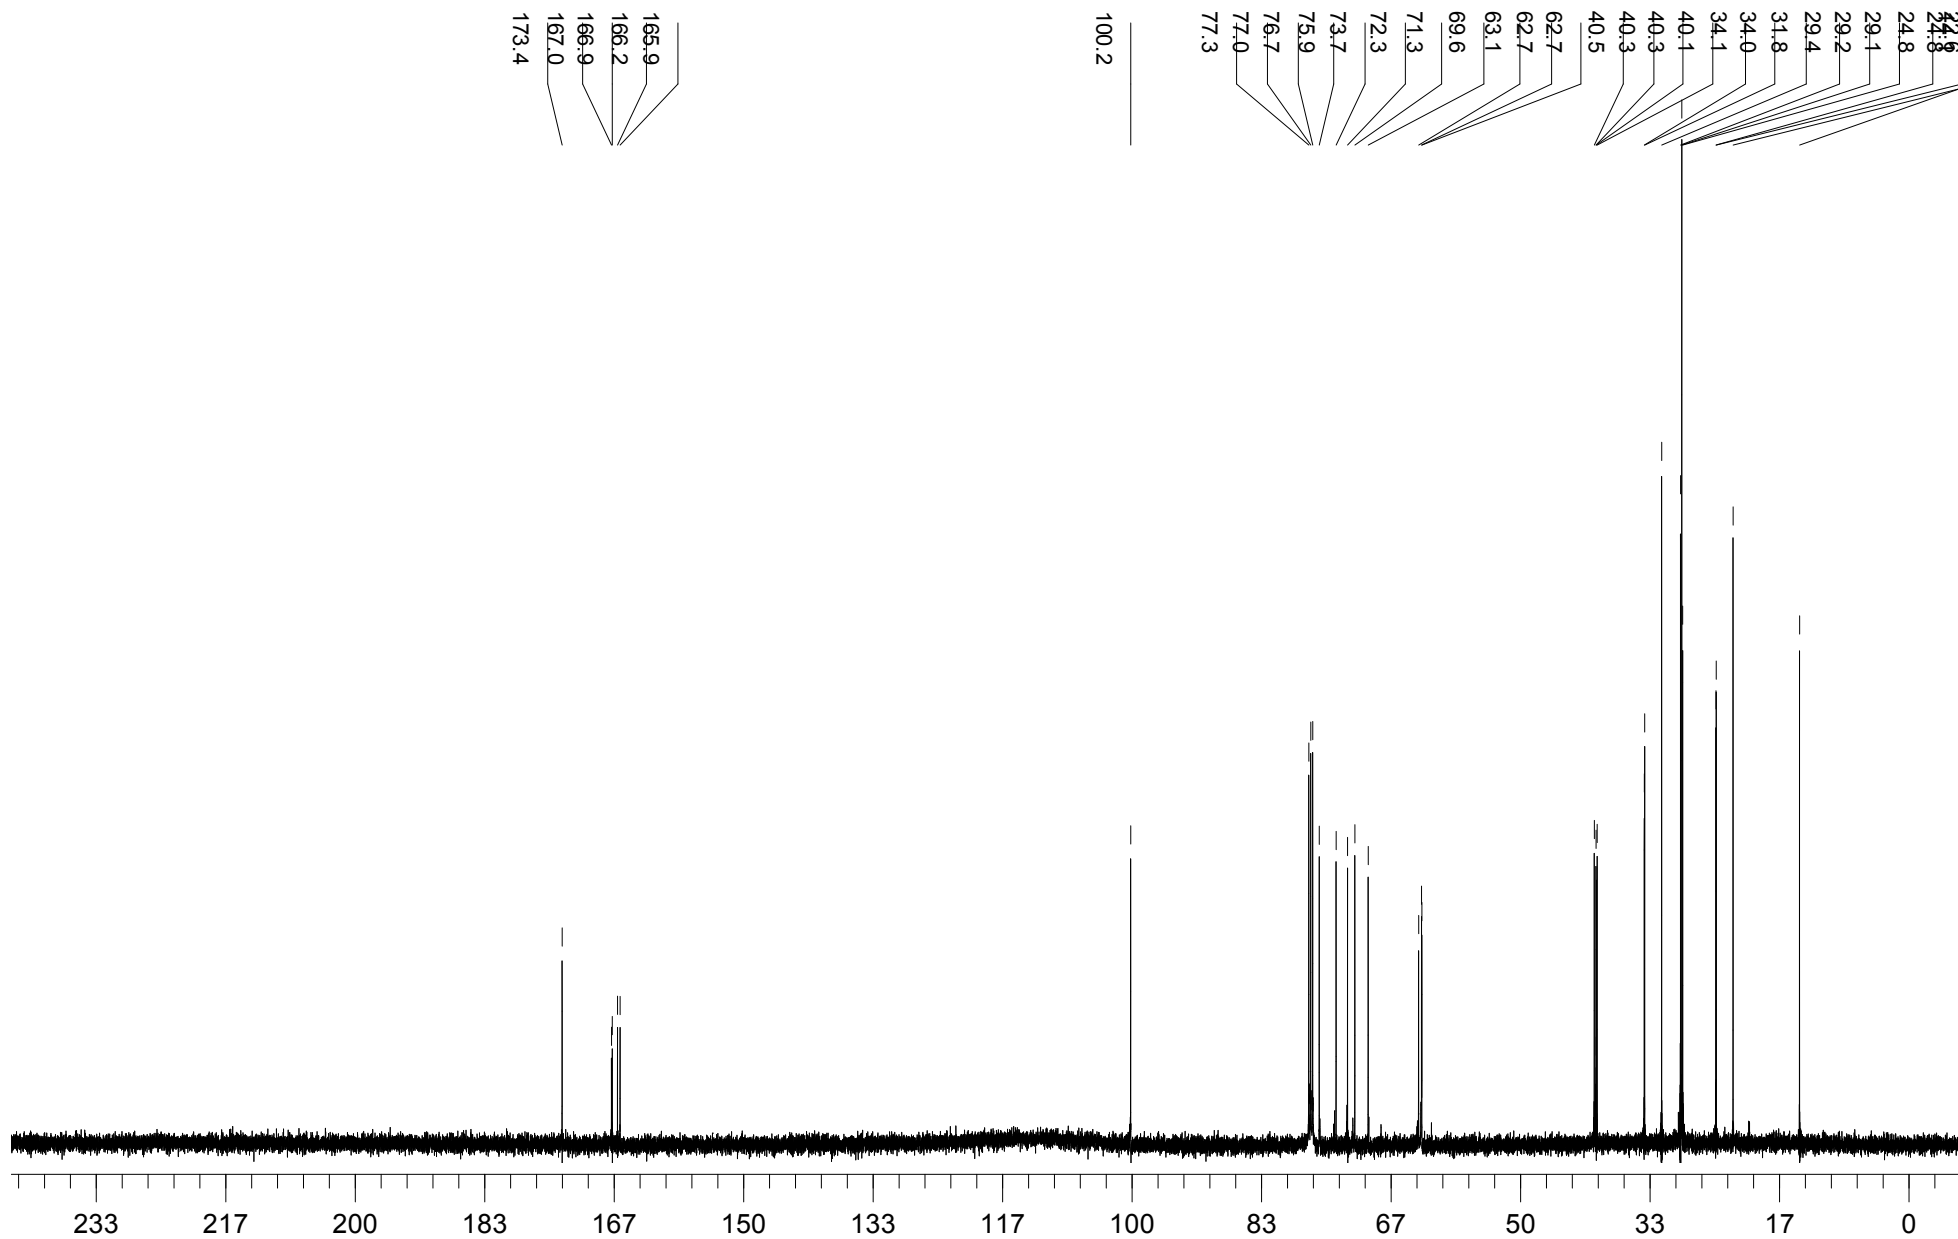

1-O-octadecanoyl-3-O-acetyl-2-O-(2',3',4',6'-tetra-O-acetyl- $\beta$ -D-glucopyranosyl)-sn-glycerol

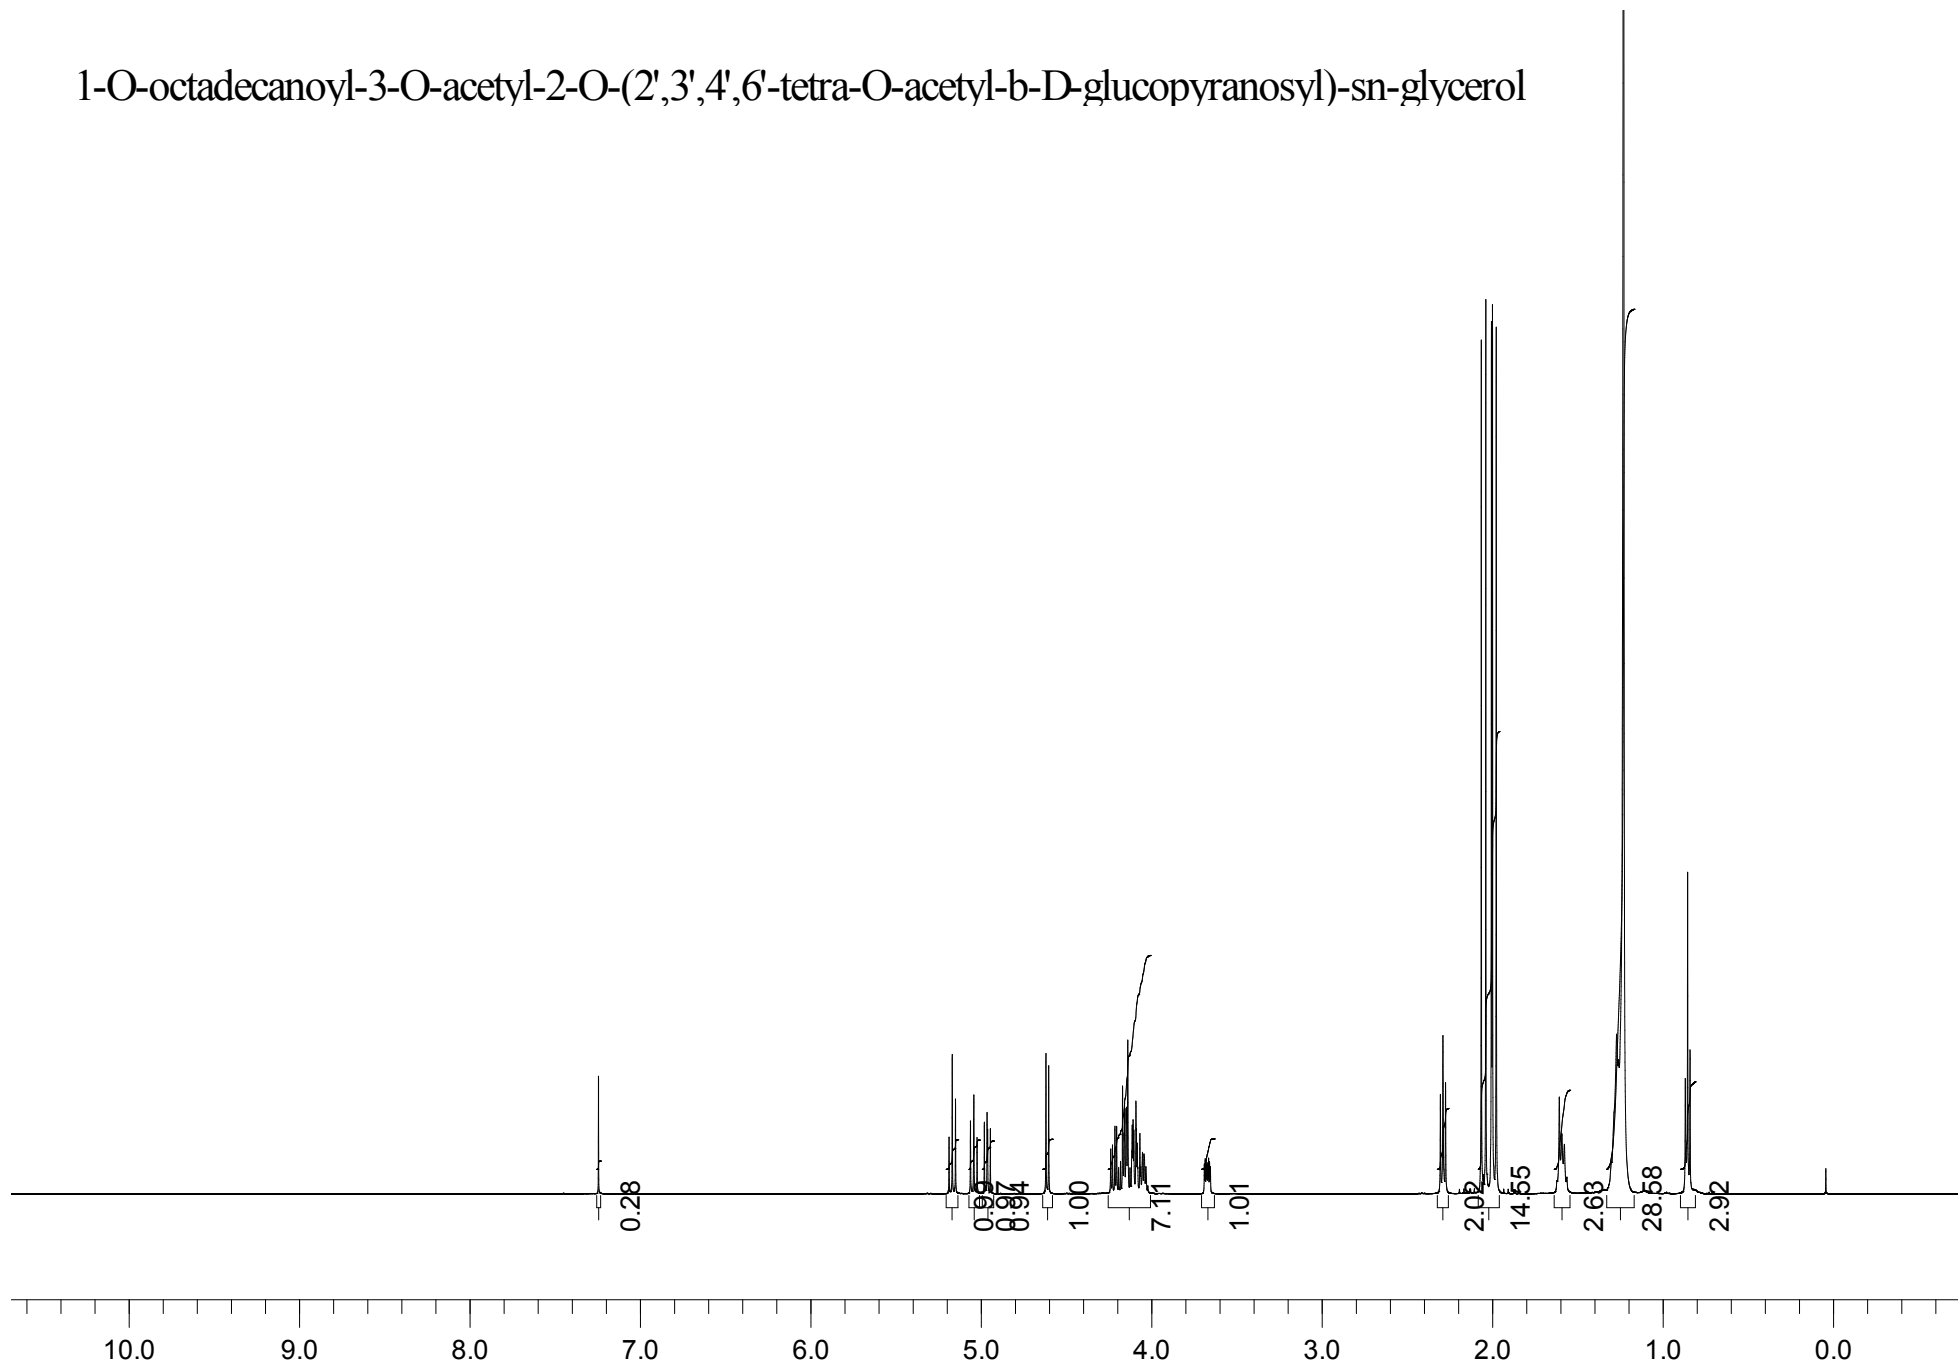

1-O-octadecanoyl-3-O-acetyl-2-O-(2',3',4',6'-tetra-O-acetyl- $\beta$ -D-glucopyranosyl)-sn-glycerol

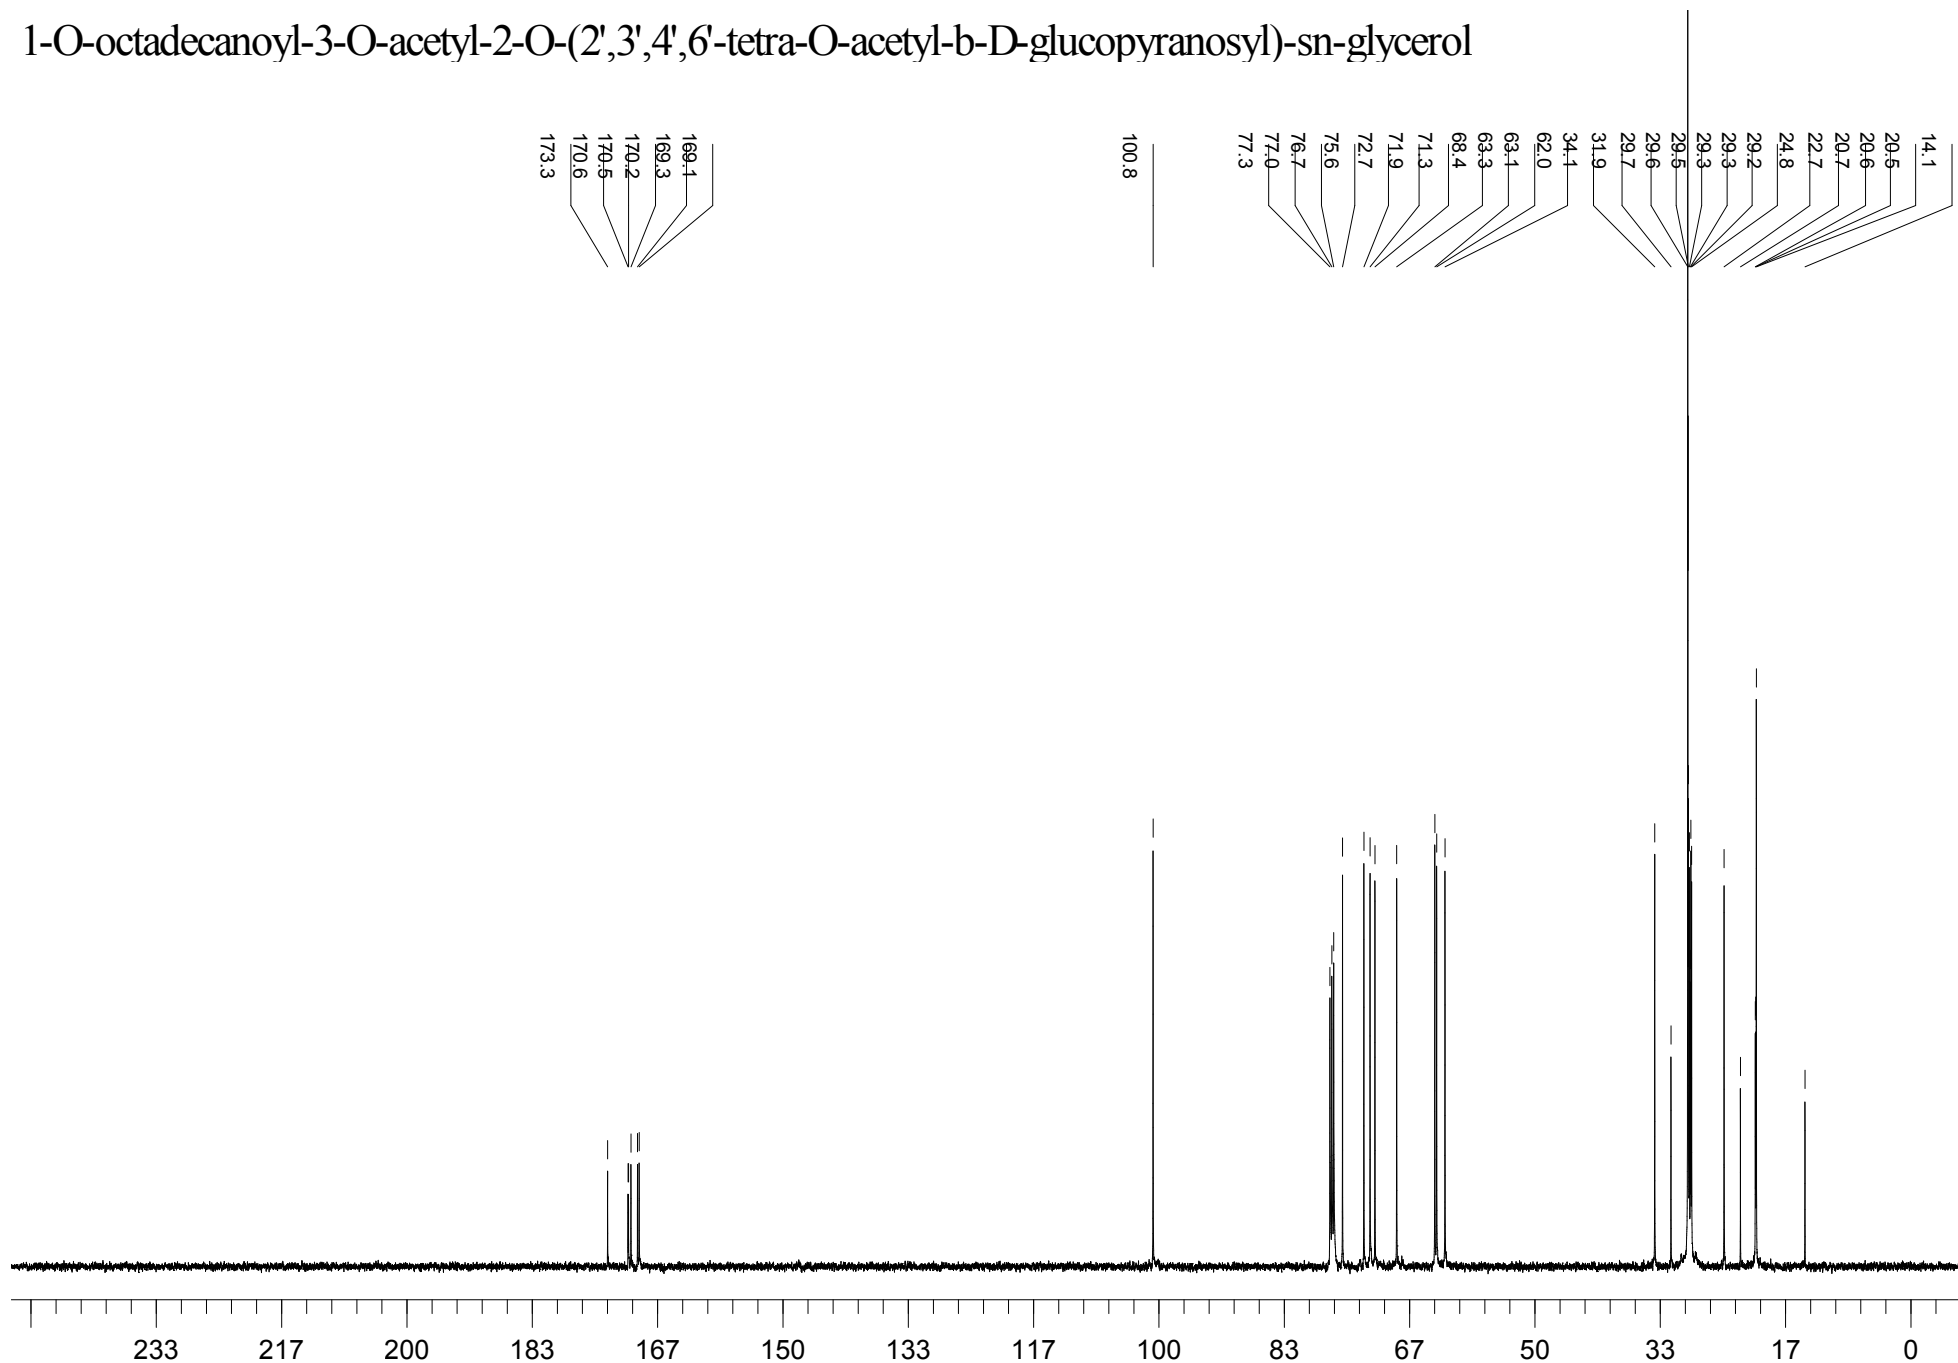

Supplement: c4ob01602e1.pdf [file c4ob01602e1.pdf]
